# Supplementary material
Source: PubMed Central journal article supplement (PMC6059610)
Supplement: NIHMS981934-supplement-Supp_Info.pdf [file NIHMS981934-supplement-Supp_Info.pdf]

## SUPPORTING INFORMATION

### Sodium Diisopropylamide in Tetrahydrofuran: Selectivities, Rates, and Mechanisms of Arene Metalations

Russell F. Algera, Yun Ma, and David B. Collum\*

Department of Chemistry and Chemical Biology  
Baker Laboratory, Cornell University  
Ithaca, New York 14853-1301  
E-mail: dbc6@cornell.edu

#### I. NMR spectroscopic studies

|                     |                                                                                                             |      |
|---------------------|-------------------------------------------------------------------------------------------------------------|------|
| <b>Figure S-1.</b>  | Plot of 1,3-dimethoxybenzene concentration versus time.                                                     | S-7  |
| <b>Figure S-2.</b>  | Plot of initial rate versus 1,3-dimethoxybenzene concentration.                                             | S-8  |
| <b>Figure S-3.</b>  | Plot of initial rate versus THF concentration for the metalation of 1,3-dimethoxybenzene.                   | S-9  |
| <b>Figure S-4.</b>  | Plot of initial rate versus NaDA concentration for the metalation of 1,3-dimethoxybenzene.                  | S-10 |
| <b>Figure S-5.</b>  | Plot of initial rate versus THF concentration for the metalation of 1,3-dimethoxybenzene in DMEA cosolvent. | S-11 |
| <b>Figure S-6.</b>  | Plot of 1,2,4-trimethoxybenzene concentration versus time.                                                  | S-12 |
| <b>Figure S-7.</b>  | Plot of initial rate versus 1,2,4-trimethoxybenzene concentration.                                          | S-13 |
| <b>Figure S-8.</b>  | Plot of initial rate versus THF concentration for the metalation of 1,2,4-trimethoxybenzene.                | S-14 |
| <b>Figure S-9.</b>  | Plot of initial rate versus NaDA concentration for the metalation of 1,2,4-trimethoxybenzene.               | S-15 |
| <b>Figure S-10.</b> | Plot of initial rate versus previous cumulative concentration of added 1,2,4-trimethoxybenzene.             | S-16 |
| <b>Figure S-11.</b> | Stacked $^2\text{H}$ NMR spectra for isotopic exchange of benzene with <i>i</i> -Pr <sub>2</sub> ND.        | S-17 |
| <b>Figure S-12.</b> | Plot of initial rate versus THF concentration for the isotopic exchange of benzene.                         | S-18 |
| <b>Figure S-13.</b> | Plot of initial rate versus NaDA concentration for the isotopic exchange of benzene.                        | S-19 |

|                     |                                                                                                                                                                 |      |
|---------------------|-----------------------------------------------------------------------------------------------------------------------------------------------------------------|------|
| <b>Figure S-14.</b> | Plot of benzene isotopologue concentration versus time for the isotopic exchange of benzene with NaDA and diisopropylamine.                                     | S-20 |
| <b>Figure S-15.</b> | Plot of initial rate versus THF concentration for the isotopic exchange of <i>N,N</i> -dimethylaniline.                                                         | S-21 |
| <b>Figure S-16.</b> | Plot of initial rate versus NaDA concentration for the isotopic exchange of <i>N,N</i> -dimethylaniline.                                                        | S-22 |
| <b>Figure S-17.</b> | Plot of initial rate versus THF concentration for the isotopic exchange of <i>N,N</i> -diethylaniline.                                                          | S-23 |
| <b>Figure S-18.</b> | Plot of initial rate versus THF concentration for the ortho selective isotopic exchange of anisole.                                                             | S-24 |
| <b>Figure S-19.</b> | Plot of initial rate versus NaDA concentration for the ortho selective isotopic exchange of anisole.                                                            | S-25 |
| <b>Figure S-20.</b> | Plot of initial rate versus THF concentration for the isotopic exchange of benzotrifluoride.                                                                    | S-27 |
| <b>Figure S-21.</b> | Plot of initial rate versus NaDA concentration for the isotopic exchange of benzotrifluoride.                                                                   | S-29 |
| <b>Figure S-22.</b> | Plot of initial rate versus THF concentration for the isotopic exchange of benzotrifluoride ( $-40\text{ }^{\circ}\text{C}$ ).                                  | S-30 |
| <b>Figure S-23.</b> | Plot of initial proportions of ortho and meta deuteration versus THF concentration for the isotopic exchange of benzotrifluoride.                               | S-31 |
| <b>Figure S-24.</b> | Plot of initial rate versus THF concentration for the ortho selective isotopic exchange of 4,4-dimethyl-2-phenyl-2-oxazoline.                                   | S-32 |
| <b>Figure S-25.</b> | Plot of initial rate versus NaDA concentration for the ortho selective isotopic exchange of 4,4-dimethyl-2-phenyl-2-oxazoline.                                  | S-33 |
| <b>Figure S-26.</b> | Plot of initial rate versus THF concentration for the ortho selective isotopic exchange of 4,4-dimethyl-2-phenyl-2-oxazoline ( $-40\text{ }^{\circ}\text{C}$ ). | S-34 |

---

## II. NMR Spectroscopy

|                     |                                                                                                             |      |
|---------------------|-------------------------------------------------------------------------------------------------------------|------|
| <b>Figure S-27.</b> | Isolated $^1\text{H}$ NMR spectrum for metalation of 1,2-dichlorobenzene with NaDA followed by MeOD quench. | S-35 |
| <b>Figure S-28.</b> | Isolated $^1\text{H}$ NMR spectrum for metalation of 1,3-dichlorobenzene with NaDA followed by MeOD quench. | S-36 |

|                     |                                                                                                                     |      |
|---------------------|---------------------------------------------------------------------------------------------------------------------|------|
| <b>Figure S-29.</b> | Isolated $^1\text{H}$ NMR spectrum for metalation of 1,3-difluorobenzene with NaDA followed by MeOD quench.         | S-37 |
| <b>Figure S-30.</b> | Isolated $^1\text{H}$ NMR spectrum for metalation of 1-chloro-3-fluorobenzene with NaDA followed by MeOD quench.    | S-38 |
| <b>Figure S-31.</b> | Isolated $^1\text{H}$ NMR spectrum for metalation of 1-bromo-2-fluorobenzene with NaDA followed by MeOD quench.     | S-39 |
| <b>Figure S-32.</b> | Isolated $^1\text{H}$ NMR spectrum for metalation of 1-fluoro-2-iodobenzene with NaDA followed by MeOD quench.      | S-40 |
| <b>Figure S-33.</b> | Isolated $^1\text{H}$ NMR spectrum for metalation of 2-fluorobenzotrifluoride with NaDA followed by MeOD quench.    | S-41 |
| <b>Figure S-34.</b> | Isolated $^1\text{H}$ NMR spectrum for metalation of 2-chlorobenzotrifluoride with NaDA followed by MeOD quench.    | S-42 |
| <b>Figure S-35.</b> | Isolated $^1\text{H}$ NMR spectrum for metalation of 2-bromobenzotrifluoride with NaDA followed by MeOD quench.     | S-43 |
| <b>Figure S-36.</b> | Isolated $^1\text{H}$ NMR spectrum for metalation of 3-fluorobenzotrifluoride with NaDA followed by MeOD quench.    | S-44 |
| <b>Figure S-37.</b> | Isolated $^1\text{H}$ NMR spectrum for metalation of 3-chlorobenzotrifluoride with NaDA followed by MeOD quench.    | S-45 |
| <b>Figure S-38.</b> | Absorbance trace for the metalation/isomerization of 3-chlorobenzotrifluoride at $-116\text{ }^\circ\text{C}$ .     | S-45 |
| <b>Figure S-39.</b> | Isolated $^1\text{H}$ NMR spectrum for metalation of 3-bromobenzotrifluoride with NaDA followed by MeOD quench.     | S-46 |
| <b>Figure S-40.</b> | Isolated $^1\text{H}$ NMR spectrum for metalation of 2-chloropyridine with NaDA followed by MeOD quench.            | S-47 |
| <b>Figure S-41.</b> | Isolated $^1\text{H}$ NMR spectrum for metalation of 2-bromopyridine with NaDA followed by MeOD quench.             | S-48 |
| <b>Figure S-42.</b> | Isolated $^1\text{H}$ NMR spectrum for metalation of 2-(trifluoromethyl)pyridine with NaDA followed by MeOD quench. | S-49 |
| <b>Figure S-43.</b> | Isolated $^1\text{H}$ NMR spectrum for metalation of 3-fluoropyridine with NaDA followed by MeOD quench.            | S-50 |
| <b>Figure S-44.</b> | Isolated $^1\text{H}$ NMR spectrum for metalation of 3-chloropyridine with NaDA followed by MeOD quench.            | S-51 |
| <b>Figure S-45.</b> | Isolated $^1\text{H}$ NMR spectrum for metalation of 3-bromopyridine with NaDA followed by MeOD quench.             | S-52 |

|                     |                                                                                                                                 |      |
|---------------------|---------------------------------------------------------------------------------------------------------------------------------|------|
| <b>Figure S-46.</b> | Isolated $^1\text{H}$ NMR spectrum for metalation of 2-fluoropyrazine with NaDA followed by MeOD quench.                        | S-53 |
| <b>Figure S-47.</b> | Isolated $^1\text{H}$ NMR spectrum for metalation of 5-chloro-2-fluoropyridine with NaDA followed by MeOD quench.               | S-54 |
| <b>Figure S-48.</b> | Isolated $^1\text{H}$ NMR spectrum for metalation of 2-phenyl-2-oxazoline with NaDA followed by MeOD quench.                    | S-55 |
| <b>Figure S-49.</b> | Isolated $^1\text{H}$ NMR spectrum for metalation (preparative scale) of 1,2-dichlorobenzene with NaDA followed by MeOD quench. | S-56 |
| <b>Figure S-50.</b> | Isolated $^1\text{H}$ NMR spectrum for metalation of furan with NaDA followed by MeOD quench.                                   | S-57 |

---

### III. Computations

|                    |                                                                                                                                                 |      |
|--------------------|-------------------------------------------------------------------------------------------------------------------------------------------------|------|
| <b>Table S-1.</b>  | Geometric coordinates and thermally corrected MP2 energies for benzene.                                                                         | S-58 |
| <b>Table S-2.</b>  | Geometric coordinates and thermally corrected MP2 energies for $[\text{A}(\text{THF})_2(\text{benzene})]^\ddagger$ .                            | S-59 |
| <b>Table S-3.</b>  | Geometric coordinates and thermally corrected MP2 energies for $[\text{A}(\text{THF})_3(\text{benzene})]^\ddagger$ .                            | S-61 |
| <b>Table S-4.</b>  | Geometric coordinates and thermally corrected MP2 energies for <i>N,N</i> -dimethylaniline.                                                     | S-63 |
| <b>Table S-5.</b>  | Geometric coordinates and thermally corrected MP2 energies for ortho $[\text{A}(\text{THF})_2(\textit{N,N}\text{-dimethylaniline})]^\ddagger$ . | S-64 |
| <b>Table S-6.</b>  | Geometric coordinates and thermally corrected MP2 energies for meta $[\text{A}(\text{THF})_2(\textit{N,N}\text{-dimethylaniline})]^\ddagger$ .  | S-66 |
| <b>Table S-7.</b>  | Geometric coordinates and thermally corrected MP2 energies for para $[\text{A}(\text{THF})_2(\textit{N,N}\text{-dimethylaniline})]^\ddagger$ .  | S-68 |
| <b>Table S-8.</b>  | Geometric coordinates and thermally corrected MP2 energies for ortho $[\text{A}(\text{THF})_3(\textit{N,N}\text{-dimethylaniline})]^\ddagger$ . | S-70 |
| <b>Table S-9.</b>  | Geometric coordinates and thermally corrected MP2 energies for meta $[\text{A}(\text{THF})_3(\textit{N,N}\text{-dimethylaniline})]^\ddagger$ .  | S-72 |
| <b>Table S-10.</b> | Geometric coordinates and thermally corrected MP2 energies for para $[\text{A}(\text{THF})_3(\textit{N,N}\text{-dimethylaniline})]^\ddagger$ .  | S-74 |



|                    |                                                                                                                                                     |       |
|--------------------|-----------------------------------------------------------------------------------------------------------------------------------------------------|-------|
| <b>Table S-11.</b> | Geometric coordinates and thermally corrected MP2 energies for anisole.                                                                             | S-76  |
| <b>Table S-12.</b> | Geometric coordinates and thermally corrected MP2 energies for [A(THF) <sub>2</sub> (anisole)] <sup>‡</sup> .                                       | S-77  |
| <b>Table S-13.</b> | Geometric coordinates and thermally corrected MP2 energies for [A(THF) <sub>3</sub> (anisole)] <sup>‡</sup> .                                       | S-79  |
| <b>Table S-14.</b> | Geometric coordinates and thermally corrected MP2 energies for benzotrifluoride.                                                                    | S-81  |
| <b>Table S-15.</b> | Geometric coordinates and thermally corrected MP2 energies for ortho [A(THF) <sub>2</sub> (benzotrifluoride)] <sup>‡</sup> .                        | S-82  |
| <b>Table S-16.</b> | Geometric coordinates and thermally corrected MP2 energies for meta [A(THF) <sub>2</sub> (benzotrifluoride)] <sup>‡</sup> .                         | S-84  |
| <b>Table S-17.</b> | Geometric coordinates and thermally corrected MP2 energies for para [A(THF) <sub>2</sub> (benzotrifluoride)] <sup>‡</sup> .                         | S-86  |
| <b>Table S-18.</b> | Geometric coordinates and thermally corrected MP2 energies for ortho [A(THF) <sub>3</sub> (benzotrifluoride)] <sup>‡</sup> .                        | S-88  |
| <b>Table S-19.</b> | Geometric coordinates and thermally corrected MP2 energies for meta [A(THF) <sub>3</sub> (benzotrifluoride)] <sup>‡</sup> .                         | S-90  |
| <b>Table S-20.</b> | Geometric coordinates and thermally corrected MP2 energies for para [A(THF) <sub>3</sub> (benzotrifluoride)] <sup>‡</sup> .                         | S-92  |
| <b>Table S-21.</b> | Geometric coordinates and thermally corrected MP2 energies for 4,4-dimethyl-2-phenyl-2-oxazoline.                                                   | S-94  |
| <b>Table S-22.</b> | Geometric coordinates and thermally corrected MP2 energies for N-bound [A(THF) <sub>2</sub> (4,4-dimethyl-2-phenyl-2-oxazoline)] <sup>‡</sup> .     | S-95  |
| <b>Table S-23.</b> | Geometric coordinates and thermally corrected MP2 energies for O-bound [A(THF) <sub>2</sub> (4,4-dimethyl-2-phenyl-2-oxazoline)] <sup>‡</sup> .     | S-97  |
| <b>Table S-24.</b> | Geometric coordinates and thermally corrected MP2 energies for uncomplexed [A(THF) <sub>3</sub> (4,4-dimethyl-2-phenyl-2-oxazoline)] <sup>‡</sup> . | S-99  |
| <b>Table S-25.</b> | Geometric coordinates and thermally corrected MP2 energies for 1,3-dimethoxybenzene.                                                                | S-101 |
| <b>Table S-26.</b> | Geometric coordinates and thermally corrected MP2 energies for [A(THF) <sub>2</sub> (1,3-dimethoxybenzene)] <sup>‡</sup> .                          | S-102 |
| <b>Table S-27.</b> | Geometric coordinates and thermally corrected MP2 energies for [A(THF) <sub>3</sub> (1,3-dimethoxybenzene)] <sup>‡</sup> .                          | S-104 |

- Table S-28.** Geometric coordinates and thermally corrected MP2 energies for S-106  
1,2,4-trimethoxybenzene.
- Table S-29.** Geometric coordinates and thermally corrected MP2 energies for S-107  
[A(THF)<sub>2</sub>(1,2,4-trimethoxybenzene)]<sup>‡</sup>.
- Table S-30.** Geometric coordinates and thermally corrected MP2 energies for S-109  
[A(THF)<sub>2</sub>(1,2,4-trimethoxybenzene)]<sup>‡</sup> (methoxy away).

---

**IV. Full reference 38 (Gaussian)** S-111

---

## I. Rate Studies

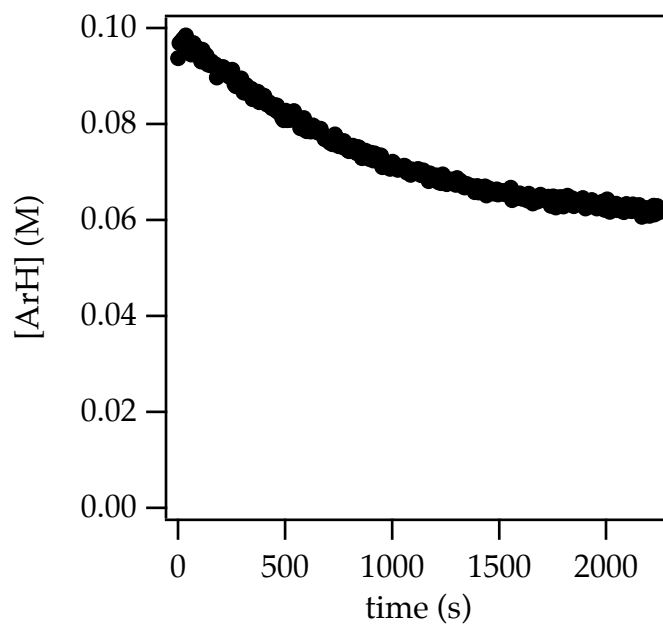

**Figure S-1.** Plot of 1,3-dimethoxybenzene (ArH) concentration versus time (ReactIR) for metalation with 0.10 M NaDA in 5.83 M THF/hexane at  $-78$  °C. Incomplete metalation reflects near thermoneutrality.

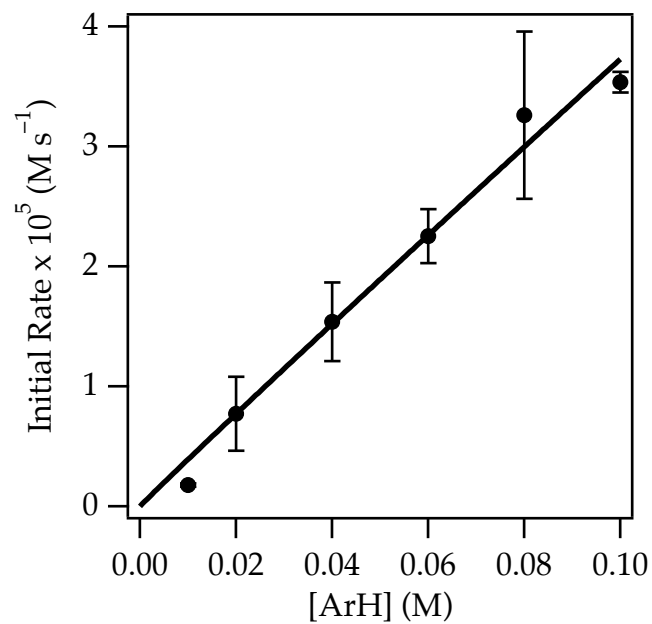

**Figure S-2.** Plot of initial rate versus 1,3-dimethoxybenzene concentration (ArH) for the metalation with 0.10 M NaDA in 6.02 M THF/hexane at  $-78\text{ }^{\circ}\text{C}$ . The curve depicts an unweighted least-squares fit to the function  $f(x) = ax$ :  $a = 37 \pm 1$ .

| [ArH] (M) | Initial Rate $\times 10^5$ ( $\text{M s}^{-1}$ ) | Standard deviation $\times 10^5$ ( $\text{M s}^{-1}$ ) |
|-----------|--------------------------------------------------|--------------------------------------------------------|
| 0.010     | 0.18                                             | 0.01                                                   |
| 0.020     | 0.8                                              | 0.3                                                    |
| 0.040     | 1.5                                              | 0.3                                                    |
| 0.060     | 2.3                                              | 0.2                                                    |
| 0.080     | 3.3                                              | 0.7                                                    |
| 0.100     | 3.54                                             | 0.08                                                   |

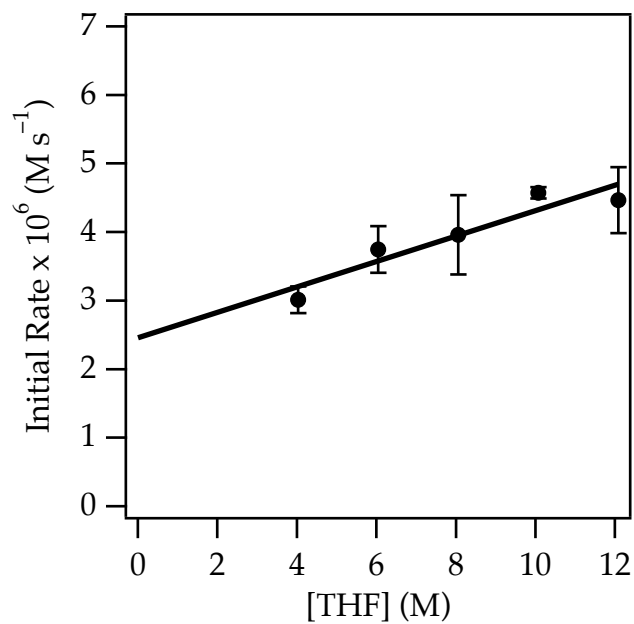

**Figure S-3.** Plot of initial rate versus THF concentration for the metalation of 0.010 M 1,3-dimethoxybenzene with 0.10 M NaDA in hexane cosolvent at  $-78$  °C. The curve depicts an unweighted least-squares fit to the function  $f(x) = ax + b$ :  $a = 0.19 \pm 0.04$ ;  $b = 2.5 \pm 0.3$ .

| [THF] (M) | Initial Rate $\times 10^6$ ( $M s^{-1}$ ) | Standard deviation $\times 10^6$ ( $M s^{-1}$ ) |
|-----------|-------------------------------------------|-------------------------------------------------|
| 4.03      | 3.0                                       | 0.2                                             |
| 6.04      | 3.7                                       | 0.3                                             |
| 8.05      | 4.0                                       | 0.6                                             |
| 10.1      | 4.58                                      | 0.08                                            |
| 12.1      | 4.5                                       | 0.5                                             |

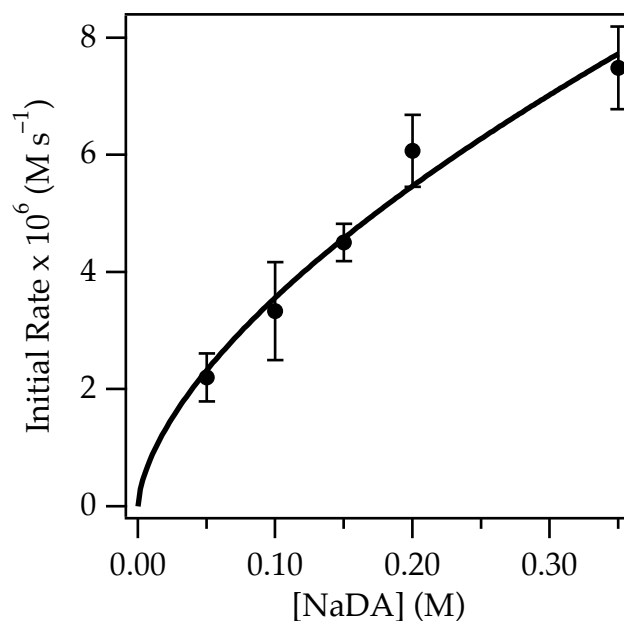

**Figure S-4.** Plot of initial rate versus NaDA concentration for the metalation of 0.010 M 1,3-dimethoxybenzene in 6.0 M THF/hexane at  $-78$  °C. The curve depicts an unweighted least-squares fit to the function  $f(x) = ax^b$ :  $a = 15 \pm 2$ ;  $b = 0.62 \pm 0.07$ .

| [NaDA] (M) | Initial Rate $\times 10^6$ ( $M s^{-1}$ ) | Standard deviation $\times 10^6$ ( $M s^{-1}$ ) |
|------------|-------------------------------------------|-------------------------------------------------|
| 0.050      | 2.2                                       | 0.4                                             |
| 0.10       | 3.3                                       | 0.8                                             |
| 0.15       | 4.5                                       | 0.3                                             |
| 0.20       | 6.1                                       | 0.6                                             |
| 0.35       | 7.5                                       | 0.7                                             |

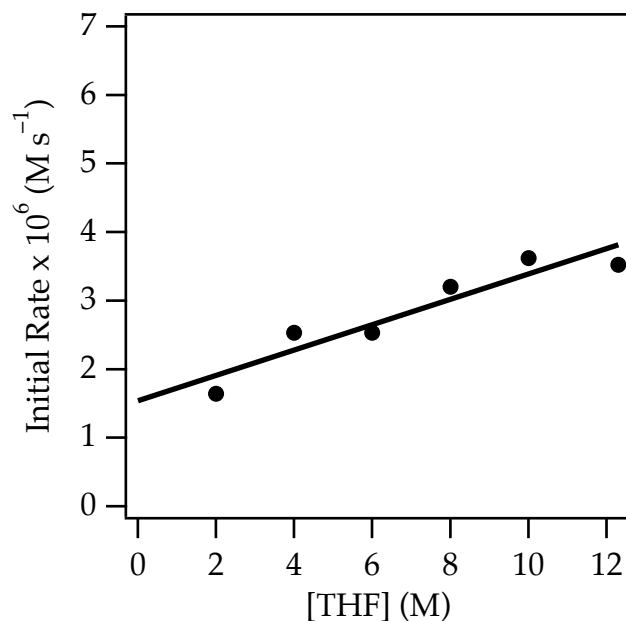

**Figure S-5.** Plot of initial rate versus THF concentration for the metalation of 0.010 M 1,3-dimethoxybenzene with 0.10 M NaDA in DMEA cosolvent at  $-78$  °C. The curve depicts an unweighted least-squares fit to the function  $f(x) = ax + b$ :  $a = 0.19 \pm 0.03$ ;  $b = 1.5 \pm 0.3$ . That the rates or behavior are not significantly different from those collected in hexane cosolvent suggests that cosolvent is inconsequential.

| [THF] (M) | Initial Rate $\times 10^6$ ( $M s^{-1}$ ) |
|-----------|-------------------------------------------|
| 2.00      | 1.65                                      |
| 4.00      | 2.54                                      |
| 6.00      | 2.53                                      |
| 8.00      | 3.21                                      |
| 10.0      | 3.62                                      |
| 12.3      | 3.53                                      |

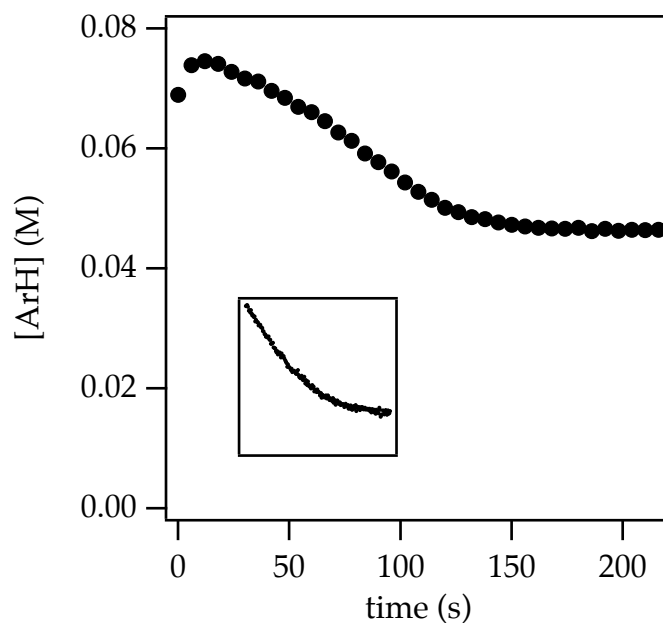

**Figure S-6.** Plot of 1,2,4-trimethoxybenzene (ArH) concentration versus time (ReactIR) for metalation of 0.080 M ArH with 0.10 M NaDA in neat THF at  $-78\text{ }^{\circ}\text{C}$ . Inset: Plot of 1,2,4-trimethoxybenzene (ArH) concentration versus time (time to completion is  $\sim 1200$  seconds) for metalation of 0.010 M ArH with 0.10 M NaDA in neat THF at  $-78\text{ }^{\circ}\text{C}$ . The sigmoidal behavior at high concentration is indicative of autocatalysis.



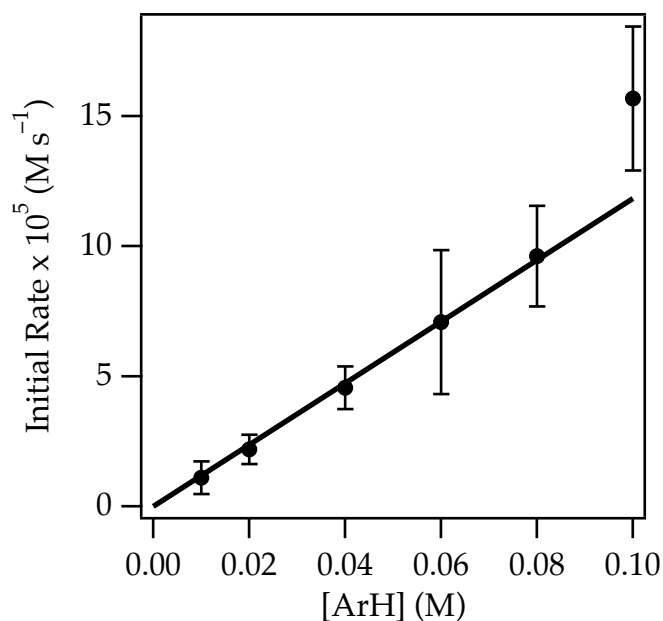

**Figure S-7.** Plot of initial rate versus 1,2,4-trimethoxybenzene concentration (ArH) for the metalation with 0.10 M NaDA in neat THF at  $-78\text{ }^{\circ}\text{C}$ . The curve depicts an unweighted least-squares fit to the function  $f(x) = ax$ :  $a = 118 \pm 1$ . The point corresponding to  $[\text{ArH}] = 0.10\text{ M}$  is omitted from the fit because of the early onset of autocatalytic acceleration.

| [ArH] (M) | Initial Rate $\times 10^5$ ( $\text{M s}^{-1}$ ) | Standard deviation $\times 10^5$ ( $\text{M s}^{-1}$ ) |
|-----------|--------------------------------------------------|--------------------------------------------------------|
| 0.010     | 1.1                                              | 0.6                                                    |
| 0.020     | 2.2                                              | 0.6                                                    |
| 0.040     | 4.6                                              | 0.8                                                    |
| 0.060     | 7                                                | 3                                                      |
| 0.080     | 10                                               | 2                                                      |
| 0.10      | 16                                               | 3                                                      |

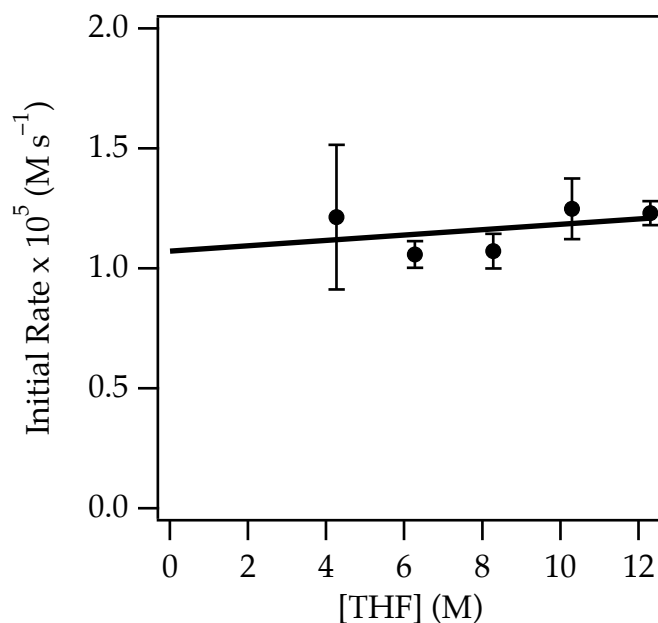

**Figure S-8.** Plot of initial rate versus THF concentration for the metalation of 0.010 M 1,2,4-trimethoxybenzene with 0.10 M NaDA in hexane cosolvent at  $-78\text{ }^{\circ}\text{C}$ . The curve depicts an unweighted least-squares fit to the function  $f(x) = ax + b$ :  $a = 0.01 \pm 0.02$ ;  $b = 1.1 \pm 0.1$ .

| [THF] (M) | Initial Rate $\times 10^5$ ( $\text{M s}^{-1}$ ) | Standard deviation $\times 10^5$ ( $\text{M s}^{-1}$ ) |
|-----------|--------------------------------------------------|--------------------------------------------------------|
| 4.26      | 1.2                                              | 0.3                                                    |
| 6.27      | 1.06                                             | 0.06                                                   |
| 8.28      | 1.07                                             | 0.07                                                   |
| 10.3      | 1.2                                              | 0.1                                                    |
| 12.3      | 1.23                                             | 0.05                                                   |

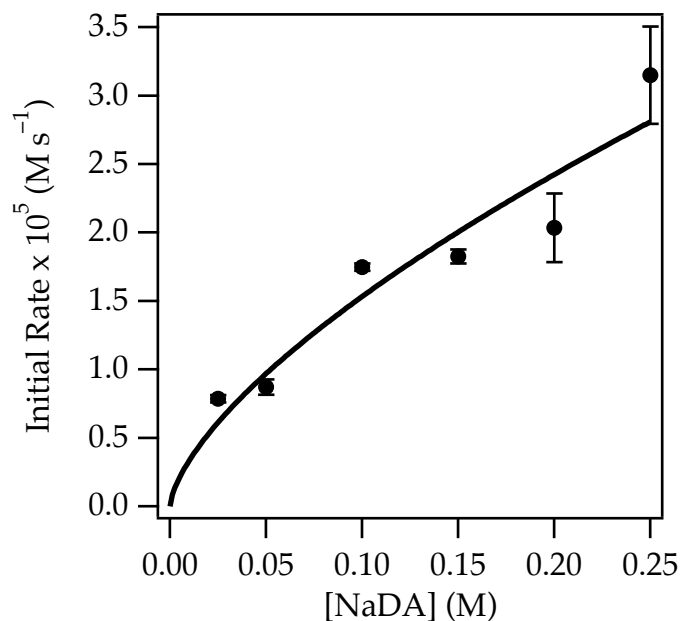

**Figure S-9.** Plot of initial rate versus NaDA concentration for the metalation of 0.010 M 1,3-dimethoxybenzene in 6.0 M THF/hexane at  $-78\text{ }^{\circ}\text{C}$ . The curve depicts an unweighted least-squares fit to the function  $f(x) = ax^b$ :  $a = 7 \pm 2$ ;  $b = 0.66 \pm 0.1$ .

| [NaDA] (M) | Initial Rate $\times 10^5$ ( $\text{M s}^{-1}$ ) | Standard deviation $\times 10^5$ ( $\text{M s}^{-1}$ ) |
|------------|--------------------------------------------------|--------------------------------------------------------|
| 0.025      | 0.79                                             | 0.03                                                   |
| 0.050      | 0.87                                             | 0.06                                                   |
| 0.10       | 1.75                                             | 0.03                                                   |
| 0.15       | 1.83                                             | 0.05                                                   |
| 0.20       | 2.0                                              | 0.3                                                    |
| 0.25       | 3.2                                              | 0.4                                                    |

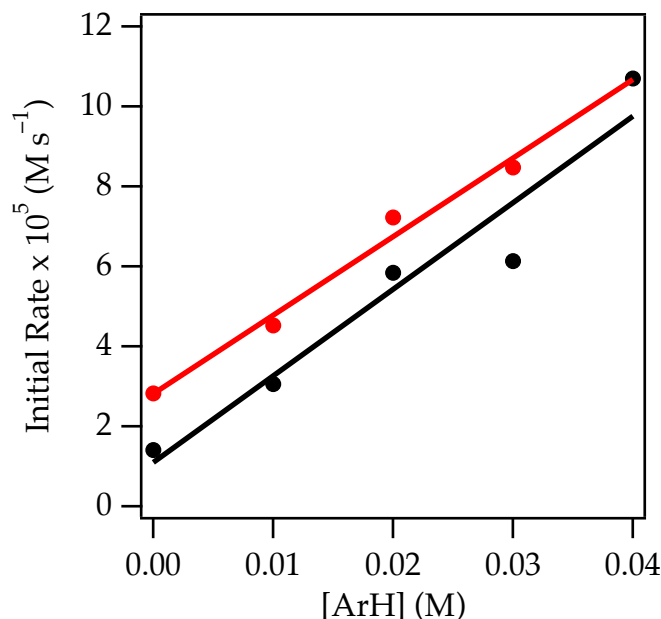

**Figure S-10.** Plot of initial rate versus previous cumulative concentration of added 1,2,4-trimethoxybenzene (ArH) for metalation in neat THF at  $-78\text{ }^{\circ}\text{C}$ . The curves depict unweighted least-squares fits to the function  $f(x) = ax + b$ : (Black trace:  $[\text{NaDA}] = 0.10\text{ M}$ ;  $a = 220 \pm 30$ ;  $b = 1.1 \pm 0.8$ ); (Red trace:  $[\text{NaDA}] = 0.25\text{ M}$ ;  $a = 200 \pm 20$ ;  $b = 2.8 \pm 0.4$ ). In the event, a background spectrum was collected followed by addition of  $0.010\text{ M}$  ArH. Upon completion, the collection was aborted and the process of serial injection was repeated. In the absence of autocatalysis, the initial rate should decrease reflecting the loss of NaDA titer. This experiment shows compensation for NaDA titer loss with autocatalysis, the expected positive NaDA dependence of initial rate in the absence of preformed arylsodium, and a surprising insensitivity of slope to initial NaDA titer.

| [ArH] (M)<br>(0.10 M NaDA) | Initial Rate $\times 10^5$ ( $M s^{-1}$ ) | [ArH] (M)<br>(0.25 M NaDA) | Initial Rate $\times 10^5$ ( $M s^{-1}$ ) |
|----------------------------|-------------------------------------------|----------------------------|-------------------------------------------|
| 0.000                      | 1.41                                      | 0.000                      | 2.83                                      |
| 0.010                      | 3.06                                      | 0.010                      | 4.52                                      |
| 0.020                      | 5.84                                      | 0.020                      | 7.22                                      |
| 0.030                      | 6.13                                      | 0.030                      | 8.48                                      |
| 0.040                      | 10.7                                      |                            |                                           |

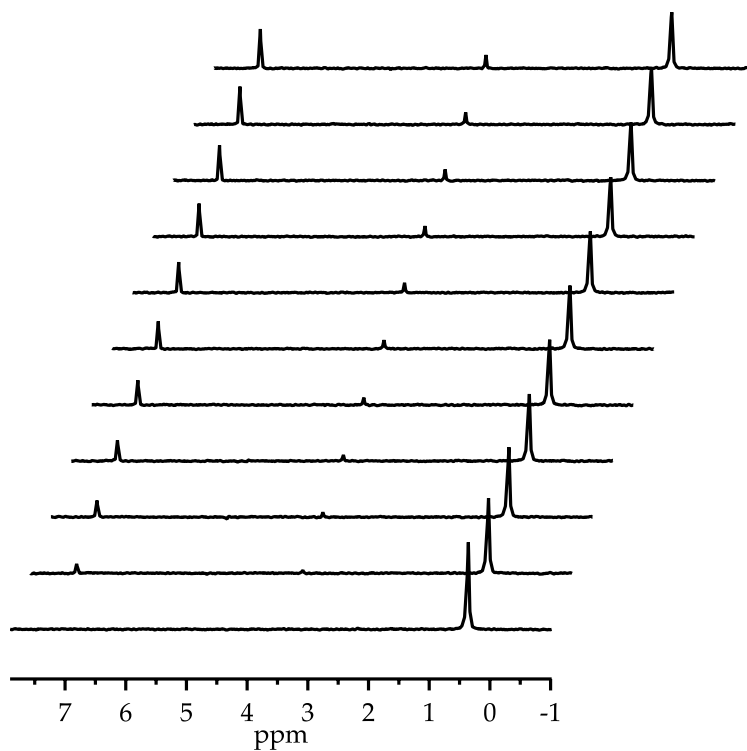

**Figure S-11.** Stacked  $^2\text{H}$  NMR spectra for isotopic exchange of 0.23 M benzene ( $\delta$  7.15) with 0.10 M NaDA and 1.04 M *i*-Pr $_2$ ND ( $\delta$  0.37) in 10.1 M THF ( $\delta$  3.42) at  $-78$   $^\circ\text{C}$ . The concomitant emergence of benzene and THF resonances is consistent with competitive rates of exchange.

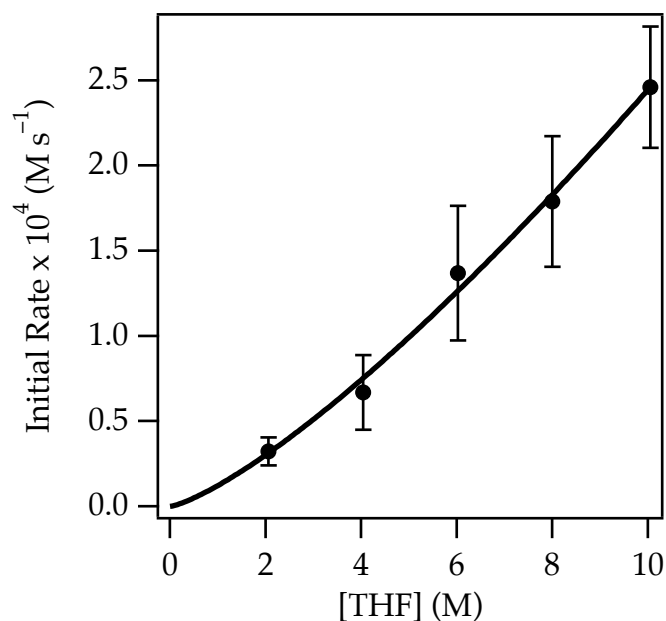

**Figure S-12.** Plot of initial rate versus THF concentration for the isotopic exchange of 0.23 M benzene with 0.10 M NaDA and 1.04 M *i*-Pr<sub>2</sub>ND in hexane cosolvent at 25 °C. The curve depicts an unweighted least-squares fit to the function  $f(x) = ax^b$ :  $a = 0.12 \pm 0.02$ ;  $b = 1.30 \pm 0.09$ .

| [THF] (M) | Initial Rate $\times 10^4$ (M s <sup>-1</sup> ) | Standard deviation $\times 10^4$ (M s <sup>-1</sup> ) |
|-----------|-------------------------------------------------|-------------------------------------------------------|
| 2.06      | 0.32                                            | 0.08                                                  |
| 4.04      | 0.7                                             | 0.2                                                   |
| 6.02      | 1.4                                             | 0.4                                                   |
| 8.00      | 1.8                                             | 0.4                                                   |
| 10.1      | 2.5                                             | 0.4                                                   |

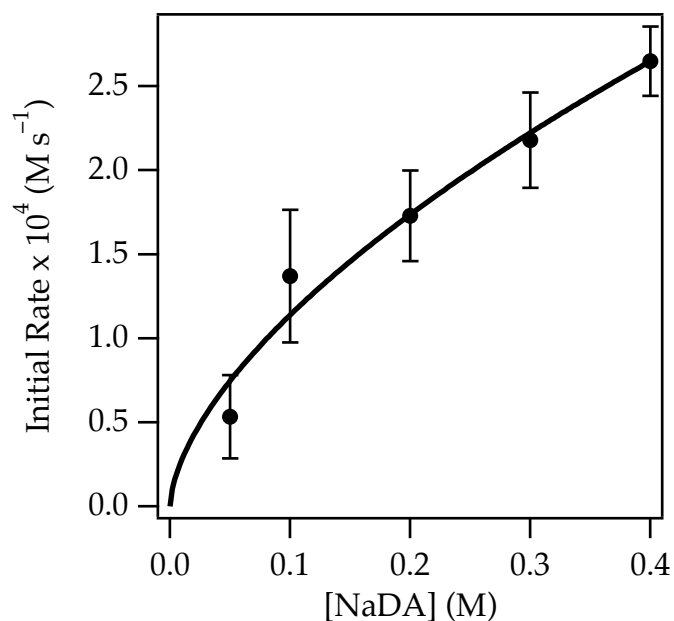

**Figure S-13.** Plot of initial rate versus NaDA concentration for the isotopic exchange of 0.23 M benzene and 1.04 M *i*-Pr<sub>2</sub>ND in 6.02 M THF/hexane at 25 °C. The curve depicts an unweighted least-squares fit to the function  $f(x) = ax^b$ :  $a = 4.6 \pm 0.6$ ;  $b = 0.61 \pm 0.09$ .

| [NaDA] (M) | Initial Rate $\times 10^4$ (M s <sup>-1</sup> ) | Standard deviation $\times 10^4$ (M s <sup>-1</sup> ) |
|------------|-------------------------------------------------|-------------------------------------------------------|
| 0.050      | 0.5                                             | 0.2                                                   |
| 0.10       | 1.4                                             | 0.4                                                   |
| 0.20       | 1.7                                             | 0.3                                                   |
| 0.30       | 2.2                                             | 0.3                                                   |
| 0.40       | 2.7                                             | 0.2                                                   |

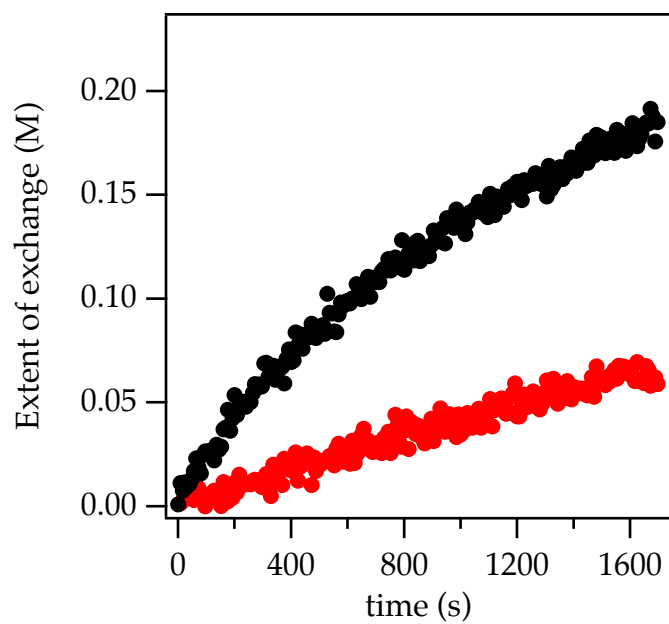

**Figure S-14.** Plot of benzene isotopologue concentration (black trace: benzene- $h_6$  and  $i$ -Pr<sub>2</sub>ND; red trace: benzene- $d_6$  and  $i$ -Pr<sub>2</sub>NH) versus time for the isotopic exchange of 0.23 M benzene with 0.10 M NaDA and 1.04 M diisopropylamine in 10.1 M THF at 25 °C. These plots collectively attest to an isotope effect of  $k_H/k_D = 6.3$ .



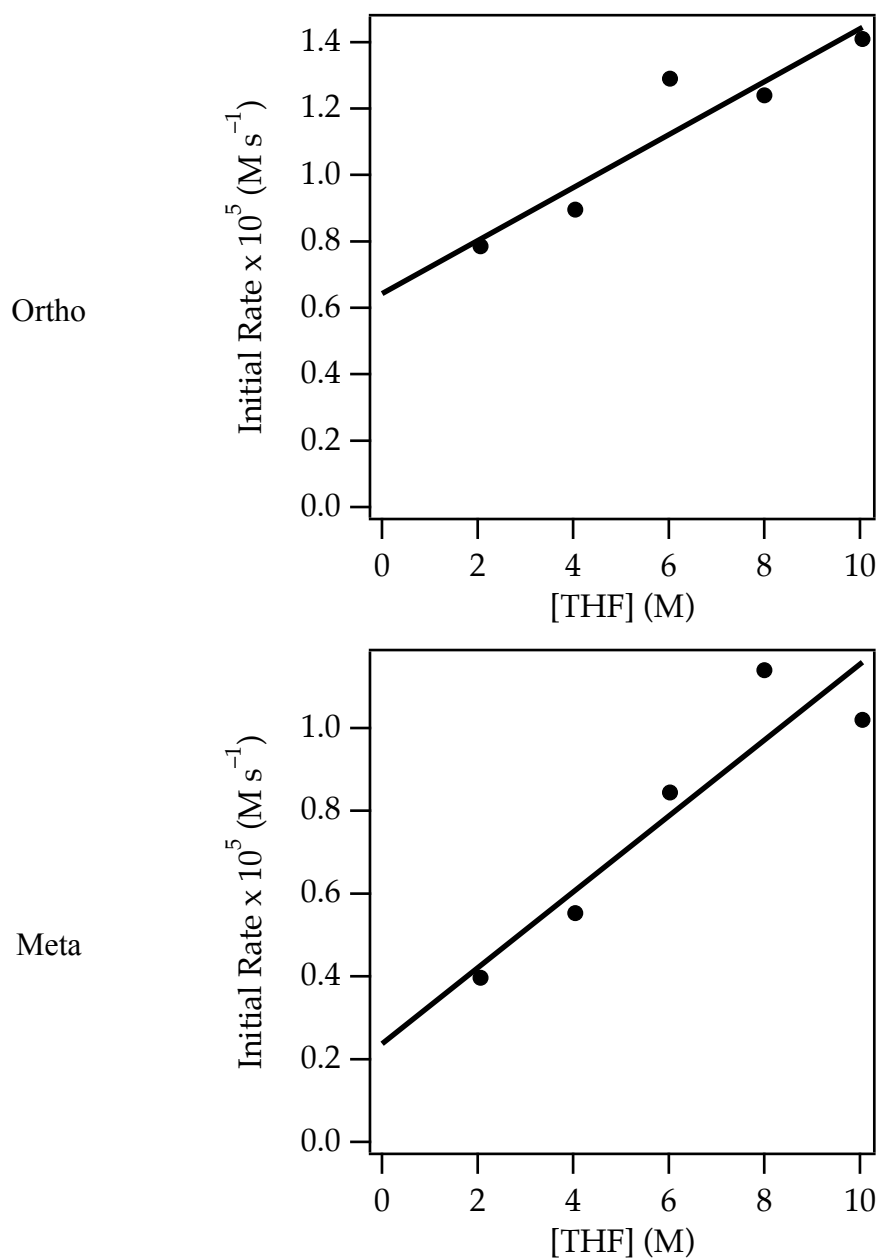

**Figure S-15.** Plot of initial rate versus THF concentration for the isotopic exchange of 0.44 M *N,N*-dimethylaniline with 0.10 M NaDA and 0.79 M *i*-Pr<sub>2</sub>ND in hexane cosolvent at 25 °C. The curves depict unweighted least-squares fits to the function  $f(x) = ax + b$ : Ortho: ( $a = 0.08 \pm 0.02$ ;  $b = 0.6 \pm 0.1$ ); Meta: ( $a = 0.09 \pm 0.02$ ;  $b = 0.2 \pm 0.1$ ).

| [THF] (M) | Ortho Initial Rate $\times 10^5$ ( $M s^{-1}$ ) | Meta Initial Rate $\times 10^5$ ( $M s^{-1}$ ) |
|-----------|-------------------------------------------------|------------------------------------------------|
| 2.06      | 0.786                                           | 0.397                                          |
| 4.04      | 0.896                                           | 0.553                                          |
| 6.02      | 1.29                                            | 0.844                                          |
| 8.00      | 1.24                                            | 1.14                                           |
| 10.1      | 1.41                                            | 1.02                                           |

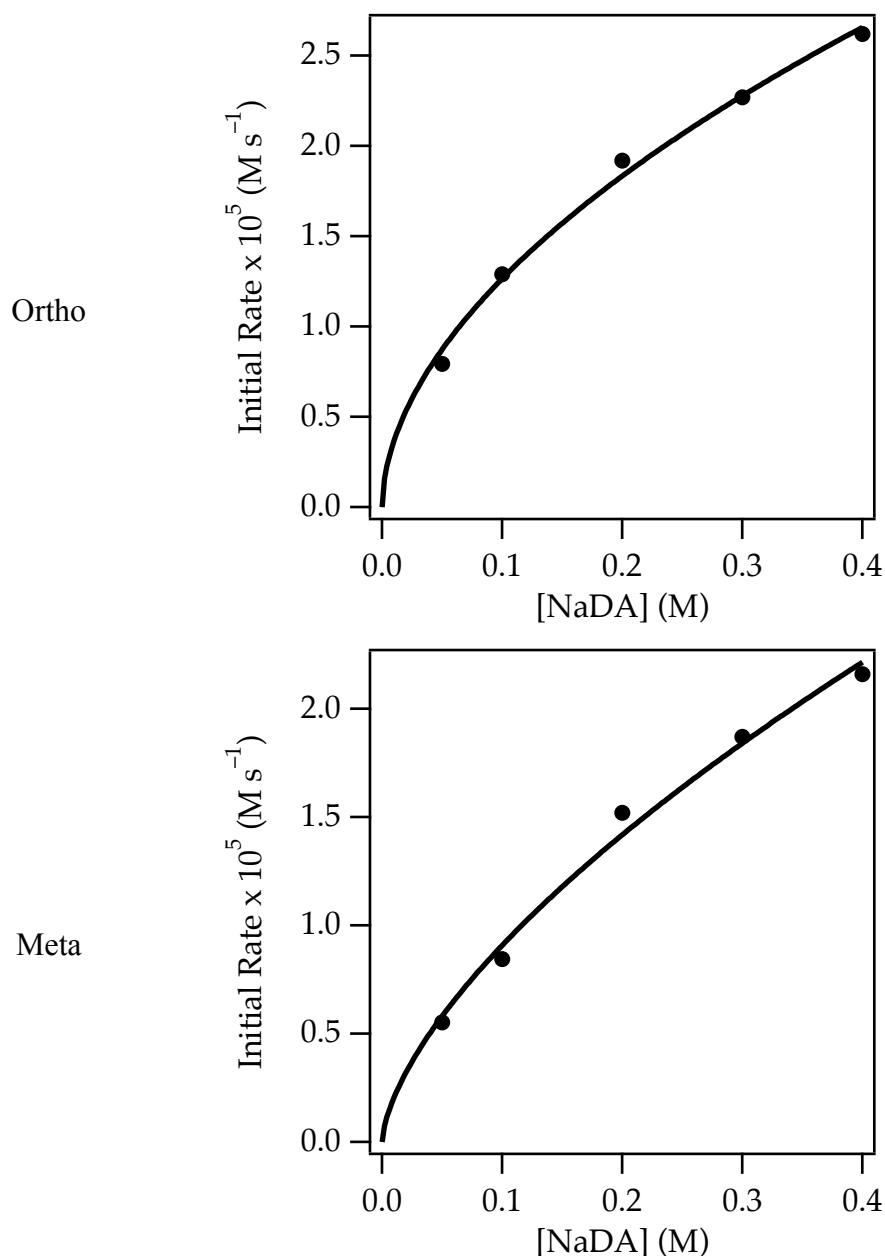

**Figure S-16.** Plot of initial rate versus NaDA concentration for the isotopic exchange of 0.44 M *N,N*-dimethylaniline with 0.79 M *i*-Pr<sub>2</sub>ND in 6.02 M THF/hexane at 25 °C. The curves depict unweighted least-squares fits to the function  $f(x) = ax^b$ : Ortho: ( $a = 4.3 \pm 0.2$ ;  $b = 0.53 \pm 0.03$ ); Meta: ( $a = 4.0 \pm 0.3$ ;  $b = 0.65 \pm 0.05$ ).

| [NaDA] (M) | Ortho Initial Rate $\times 10^5$ ( $\text{M s}^{-1}$ ) | Meta Initial Rate $\times 10^5$ ( $\text{M s}^{-1}$ ) |
|------------|--------------------------------------------------------|-------------------------------------------------------|
| 0.050      | 0.793                                                  | 0.553                                                 |
| 0.10       | 1.29                                                   | 0.844                                                 |
| 0.20       | 1.92                                                   | 1.52                                                  |
| 0.30       | 2.27                                                   | 1.87                                                  |
| 0.40       | 2.62                                                   | 2.16                                                  |

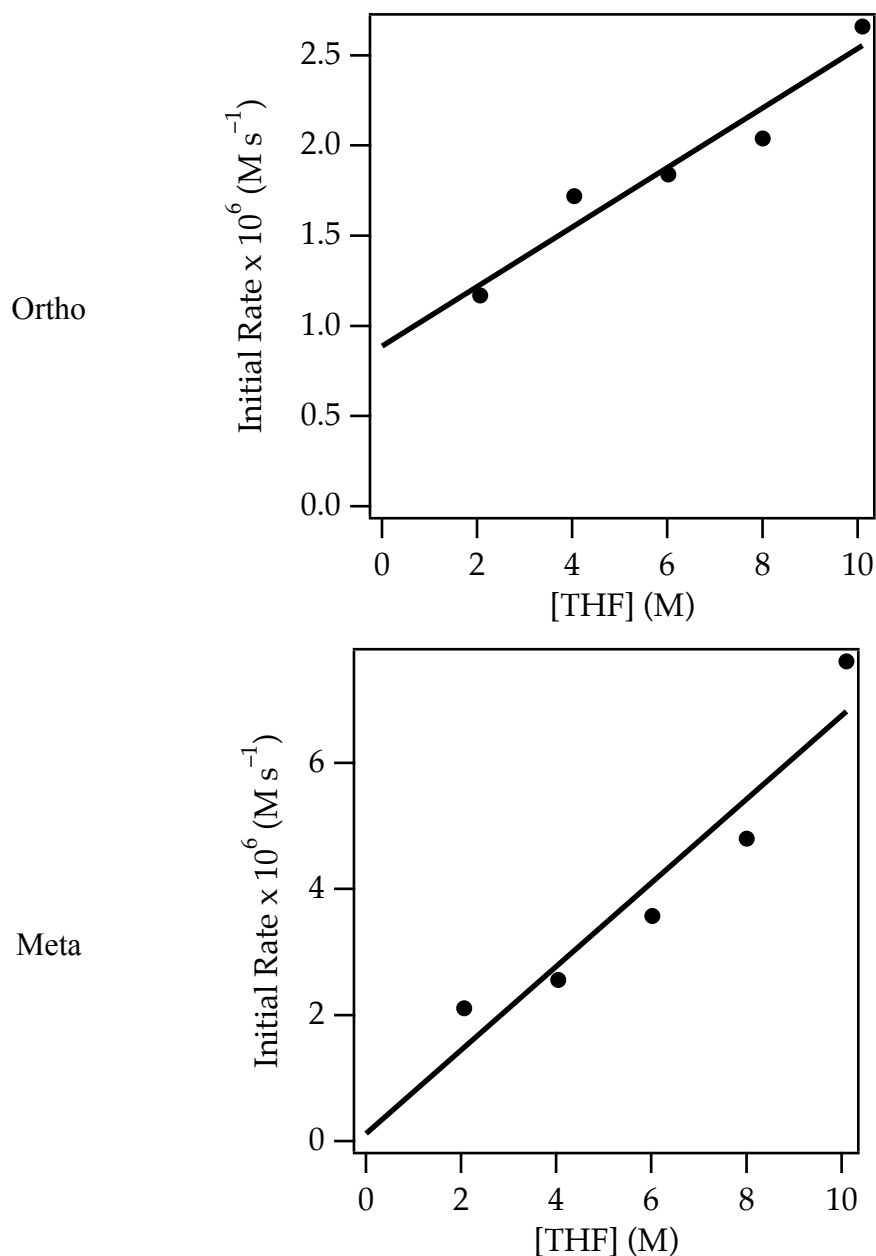

**Figure S-17.** Plot of initial rate versus THF concentration for the isotopic exchange of 0.35 M *N,N*-diethylaniline with 0.10 M NaDA and 0.79 M *i*-Pr<sub>2</sub>ND in hexane cosolvent at 25 °C. The curves depict unweighted least-squares fits to the function  $f(x) = ax + b$ : Ortho: ( $a = 0.16 \pm 0.02$ ;  $b = 0.9 \pm 0.2$ ); Meta: ( $a = 0.6 \pm 0.1$ ;  $b = 0.1 \pm 0.8$ ).

| [THF] (M) | Ortho Initial Rate $\times 10^6$ ( $\text{M s}^{-1}$ ) | Meta Initial Rate $\times 10^6$ ( $\text{M s}^{-1}$ ) |
|-----------|--------------------------------------------------------|-------------------------------------------------------|
| 2.06      | 1.17                                                   | 2.11                                                  |
| 4.04      | 1.72                                                   | 2.56                                                  |
| 6.02      | 1.84                                                   | 3.57                                                  |
| 8.00      | 2.04                                                   | 4.8                                                   |
| 10.1      | 2.66                                                   | 7.61                                                  |

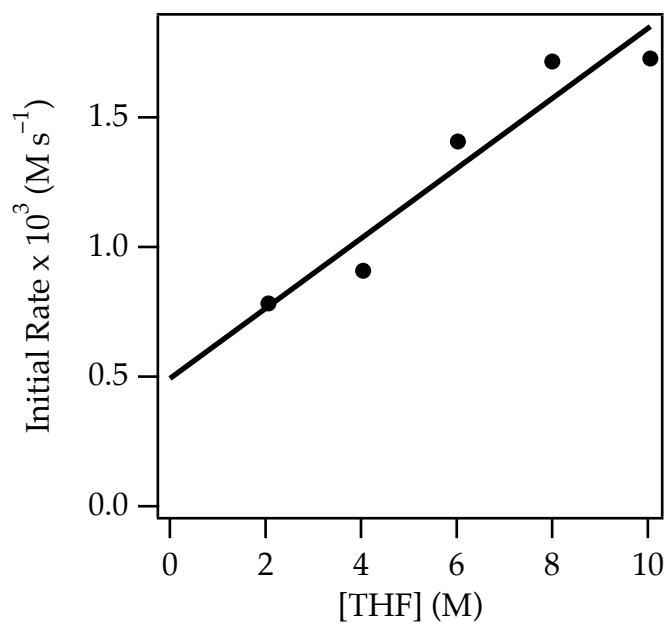

**Figure S-18.** Plot of initial rate versus THF concentration for the ortho selective isotopic exchange of 0.51 M anisole with 0.10 M NaDA and 0.79 M *i*-Pr<sub>2</sub>ND in hexane cosolvent at -20 °C. The curve depicts an unweighted least-squares fit to the function  $f(x) = ax + b$ :  $a = 0.12 \pm 0.02$ ;  $b = 0.5 \pm 0.2$ .

| [THF] (M) | Initial Rate $\times 10^3$ (M s <sup>-1</sup> ) |
|-----------|-------------------------------------------------|
| 2.06      | 0.782                                           |
| 4.04      | 0.908                                           |
| 6.02      | 1.41                                            |
| 8.00      | 1.72                                            |
| 10.1      | 1.73                                            |

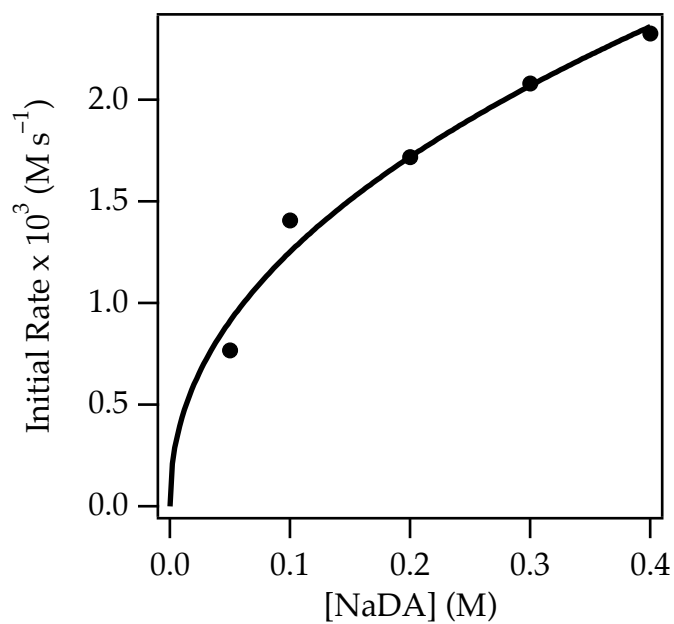

**Figure S-19.** Plot of initial rate versus NaDA concentration for the ortho selective isotopic exchange of 0.51 M anisole and 0.79 M *i*-Pr<sub>2</sub>ND in 6.02 M THF/hexane at -20 °C. The curve depicts an unweighted least-squares fit to the function  $f(x) = ax^b$ :  $a = 3.6 \pm 0.3$ ;  $b = 0.46 \pm 0.06$ .

| [NaDA] (M) | Initial Rate $\times 10^3$ (M s <sup>-1</sup> ) |
|------------|-------------------------------------------------|
| 0.050      | 0.768                                           |
| 0.10       | 1.41                                            |
| 0.20       | 1.72                                            |
| 0.30       | 2.08                                            |
| 0.40       | 2.33                                            |

Ortho

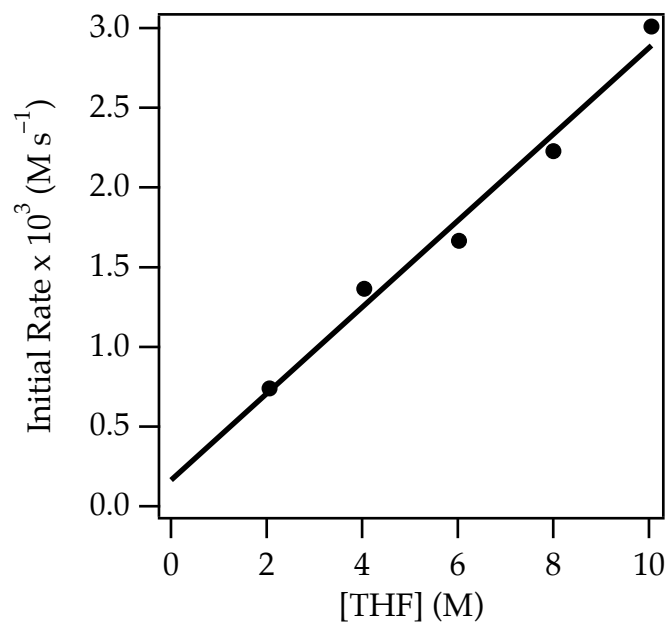

Meta

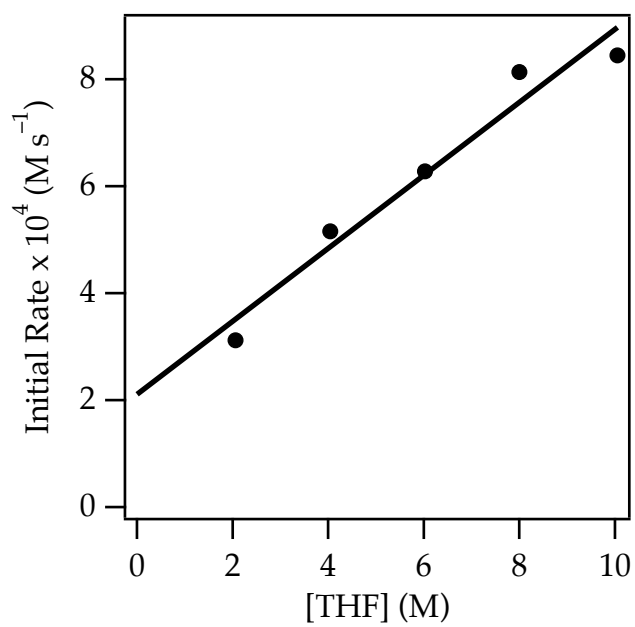

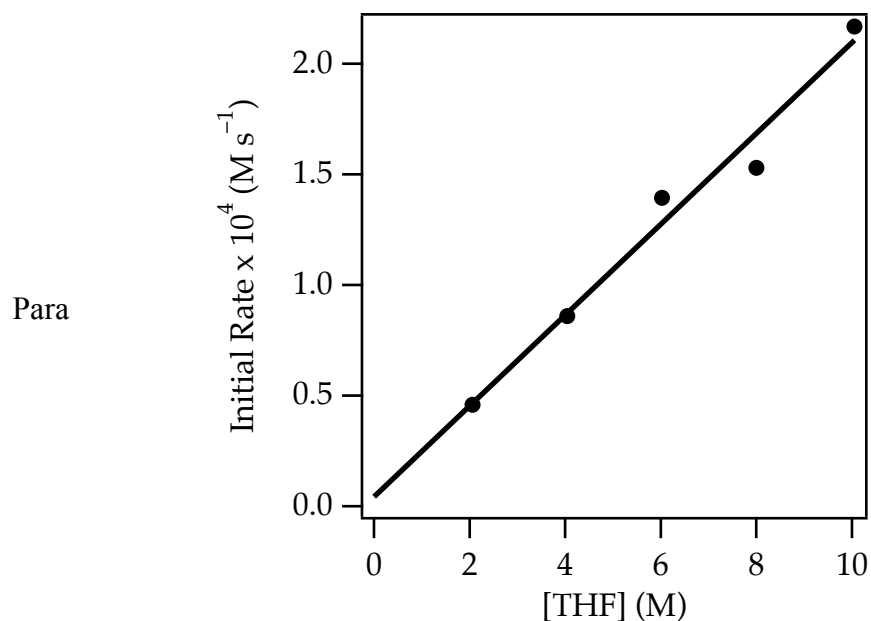

**Figure S-20.** Plot of initial rate versus THF concentration for the isotopic exchange of 0.45 M benzotrifluoride with 0.10 M NaDA and 0.79 M *i*-Pr<sub>2</sub>ND in hexane cosolvent at -20 °C. The curves depict unweighted least-squares fits to the function  $f(x) = ax + b$ : Ortho: ( $a = 0.27 \pm 0.02$ ;  $b = 0.2 \pm 0.1$ ); Meta: ( $a = 0.68 \pm 0.08$ ;  $b = 2.1 \pm 0.6$ ); Para: ( $a = 0.21 \pm 0.02$ ;  $b = 0.04 \pm 0.1$ ).

| [THF] (M) | Ortho $\times 10^3$ ( $M s^{-1}$ ) | Meta $\times 10^4$ ( $M s^{-1}$ ) | Para $\times 10^4$ ( $M s^{-1}$ ) |
|-----------|------------------------------------|-----------------------------------|-----------------------------------|
| 2.06      | 0.740                              | 3.12                              | 0.459                             |
| 4.04      | 1.37                               | 5.16                              | 0.859                             |
| 6.02      | 1.67                               | 6.28                              | 1.39                              |
| 8.00      | 2.23                               | 8.14                              | 1.53                              |
| 10.1      | 3.01                               | 8.45                              | 2.17                              |

Ortho

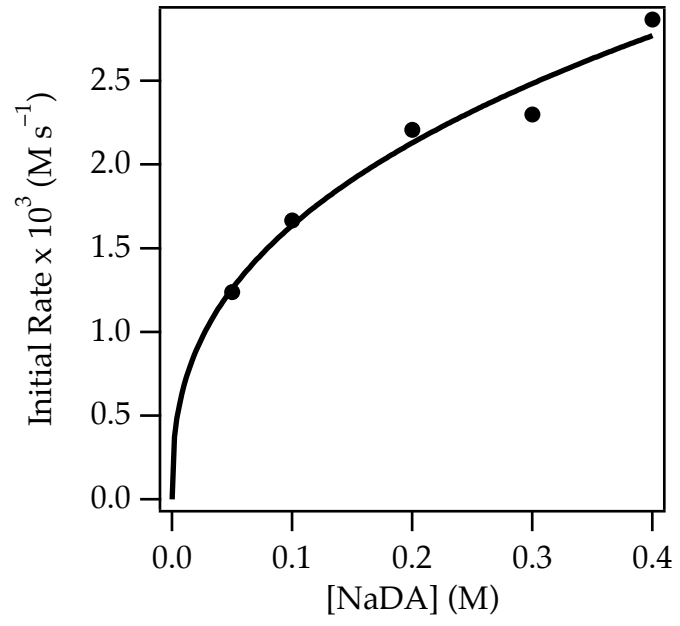

Meta

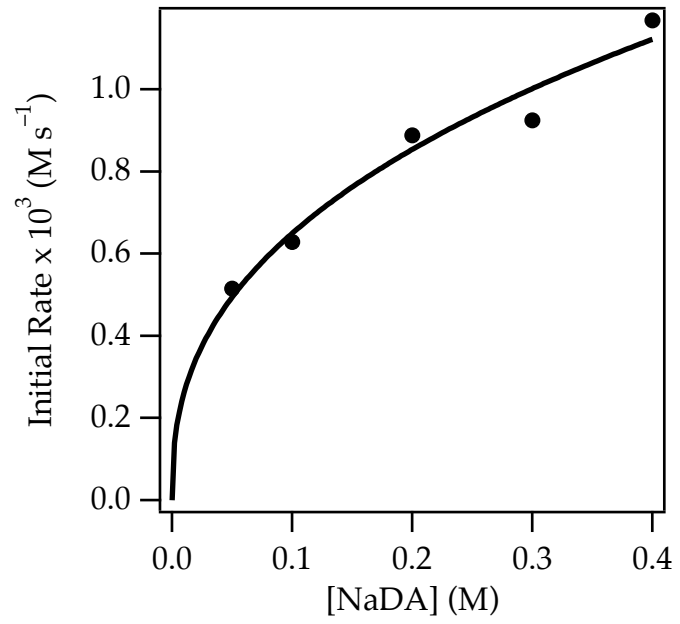



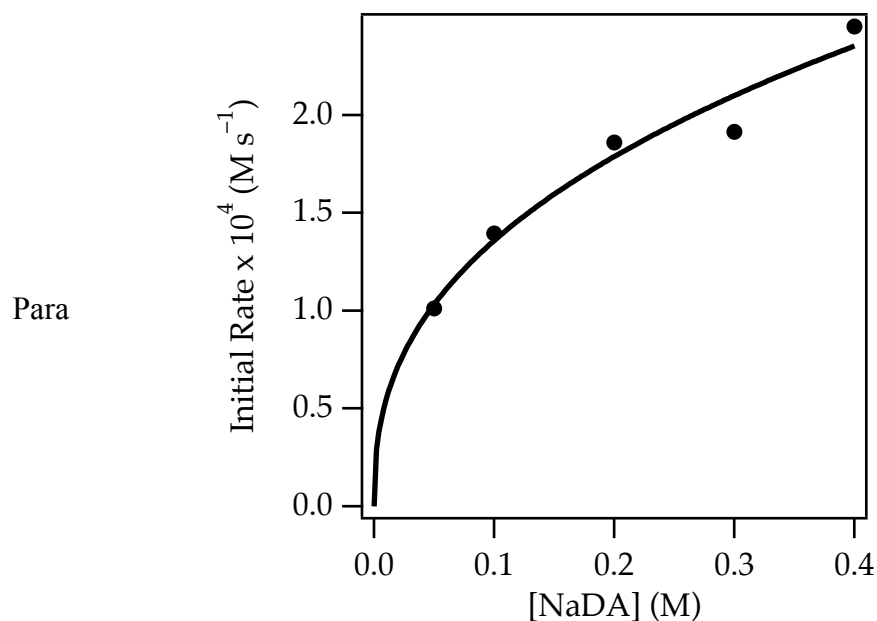

**Figure S-21.** Plot of initial rate versus NaDA concentration for the isotopic exchange of 0.45 M benzotrifluoride with 0.79 M *i*-Pr<sub>2</sub>ND in 6.02 M THF/hexane at  $-20$  °C. The curves depict unweighted least-squares fits to the function  $f(x) = ax^b$ : Ortho: ( $a = 3.9 \pm 0.3$ ;  $b = 0.38 \pm 0.04$ ); Meta: ( $a = 1.6 \pm 0.1$ ;  $b = 0.40 \pm 0.05$ ); Para: ( $a = 3.4 \pm 0.3$ ;  $b = 0.40 \pm 0.05$ ).

| [NaDA] (M) | Ortho $\times 10^3$ ( $M s^{-1}$ ) | Meta $\times 10^3$ ( $M s^{-1}$ ) | Para $\times 10^4$ ( $M s^{-1}$ ) |
|------------|------------------------------------|-----------------------------------|-----------------------------------|
| 0.050      | 1.24                               | 0.515                             | 1.01                              |
| 0.10       | 1.67                               | 0.628                             | 1.39                              |
| 0.20       | 2.21                               | 0.888                             | 1.86                              |
| 0.30       | 2.30                               | 0.925                             | 1.91                              |
| 0.40       | 2.87                               | 1.17                              | 2.45                              |

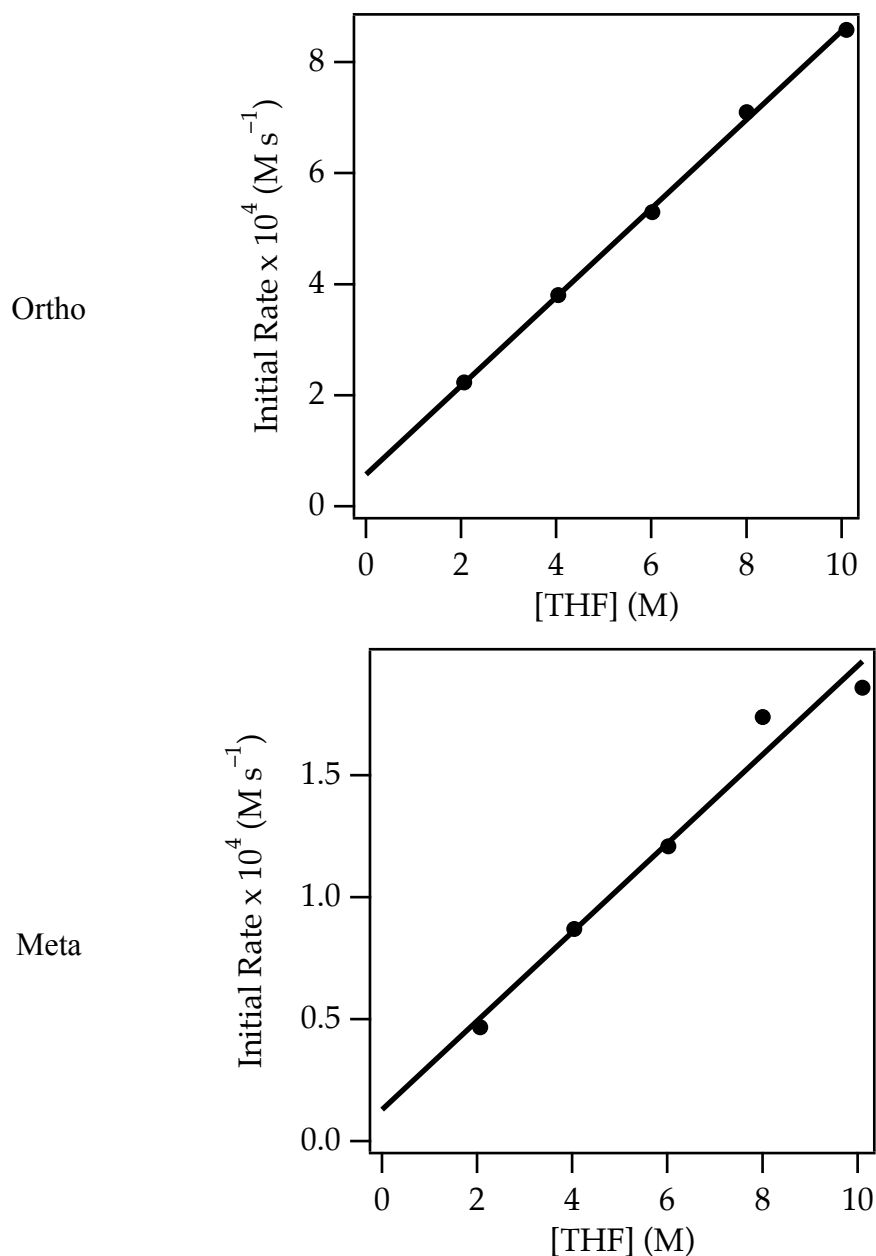

**Figure S-22.** Plot of initial rate versus THF concentration for the isotopic exchange of 0.45 M benzotrifluoride with 0.10 M NaDA and 0.79 M *i*-Pr<sub>2</sub>ND in hexane cosolvent at -40 °C. The curves depict unweighted least-squares fits to the function  $f(x) = ax + b$ : Ortho: ( $a = 0.80 \pm 0.02$ ;  $b = 0.6 \pm 0.1$ ); Meta: ( $a = 0.18 \pm 0.02$ ;  $b = 0.1 \pm 0.1$ ).

| [THF] (M) | Ortho × 10 <sup>4</sup> (M s <sup>-1</sup> ) | Meta × 10 <sup>4</sup> (M s <sup>-1</sup> ) |
|-----------|----------------------------------------------|---------------------------------------------|
| 2.06      | 2.23                                         | 0.468                                       |
| 4.04      | 3.81                                         | 0.870                                       |
| 6.02      | 5.30                                         | 1.21                                        |
| 8.00      | 7.10                                         | 1.74                                        |
| 10.1      | 8.59                                         | 1.86                                        |

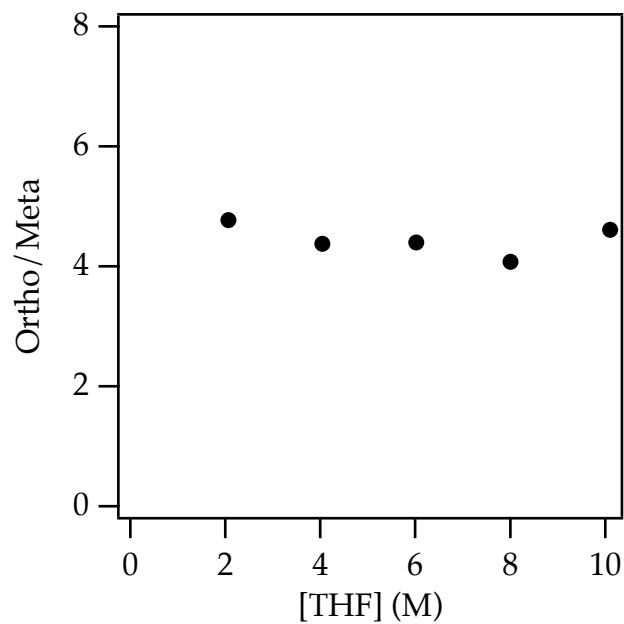

**Figure S-23.** Plot of initial proportions (ratio of initial rates) of ortho and meta deuteration versus THF concentration for the isotopic exchange of 0.45 M benzotrifluoride with 0.10 M NaDA and 0.79 M *i*-Pr<sub>2</sub>ND in hexane cosolvent at -40 °C. The invariance demonstrated argues for a common solvate eliciting the exchanges.

| [THF] (M) | Ortho:Meta |
|-----------|------------|
| 2.06      | 4.77       |
| 4.04      | 4.38       |
| 6.02      | 4.40       |
| 8.00      | 4.08       |
| 10.1      | 4.61       |

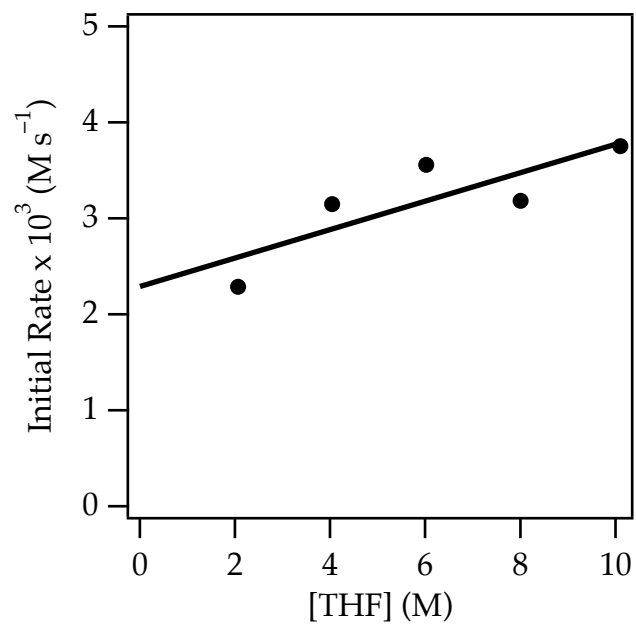

**Figure S-24.** Plot of initial rate versus THF concentration for the ortho selective isotopic exchange of 0.32 M 4,4-dimethyl-2-phenyl-2-oxazoline with 0.10 M NaDA and 0.79 M *i*-Pr<sub>2</sub>ND in hexane cosolvent at -20 °C. The curve depicts an unweighted least-squares fit to the function  $f(x) = ax + b$ :  $a = 0.15 \pm 0.06$ ;  $b = 2.3 \pm 0.4$ .

| [THF] (M) | Initial Rate $\times 10^3$ (M s <sup>-1</sup> ) |
|-----------|-------------------------------------------------|
| 2.06      | 2.29                                            |
| 4.04      | 3.15                                            |
| 6.02      | 3.56                                            |
| 8.00      | 3.18                                            |
| 10.1      | 3.75                                            |

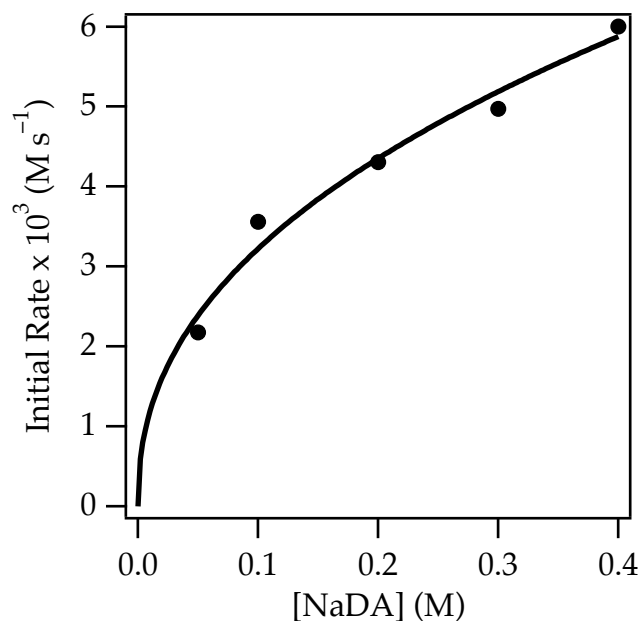

**Figure S-25.** Plot of initial rate versus NaDA concentration for the ortho selective isotopic exchange of 0.32 M 4,4-dimethyl-2-phenyl-2-oxazoline and 0.79 M *i*-Pr<sub>2</sub>ND in 6.02 M THF/hexane at -20 °C. The curve depicts an unweighted least-squares fit to the function  $f(x) = ax^b$ :  $a = 8.7 \pm 0.6$ ;  $b = 0.43 \pm 0.05$ .

| [NaDA] (M) | Initial Rate $\times 10^3$ (M s <sup>-1</sup> ) |
|------------|-------------------------------------------------|
| 0.050      | 2.18                                            |
| 0.10       | 3.56                                            |
| 0.20       | 4.31                                            |
| 0.30       | 4.97                                            |
| 0.40       | 6.00                                            |

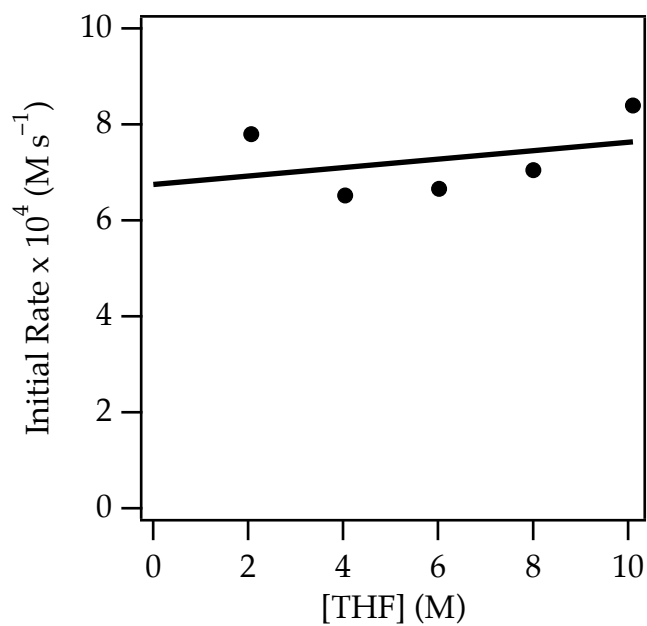

**Figure S-26.** Plot of initial rate versus THF concentration for the ortho selective isotopic exchange of 0.32 M 4,4-dimethyl-2-phenyl-2-oxazoline with 0.10 M NaDA and 0.79 M *i*-Pr<sub>2</sub>ND in hexane cosolvent at  $-40\text{ }^{\circ}\text{C}$ . The curve depicts an unweighted least-squares fit to the function  $f(x) = ax + b$ :  $a = 0.09 \pm 0.1$ ;  $b = 6.8 \pm 0.9$ .

| [THF] (M) | Initial Rate $\times 10^4$ ( $\text{M s}^{-1}$ ) |
|-----------|--------------------------------------------------|
| 2.06      | 7.80                                             |
| 4.04      | 6.52                                             |
| 6.02      | 6.66                                             |
| 8.00      | 7.05                                             |
| 10.1      | 8.39                                             |

### III. NMR Spectroscopy

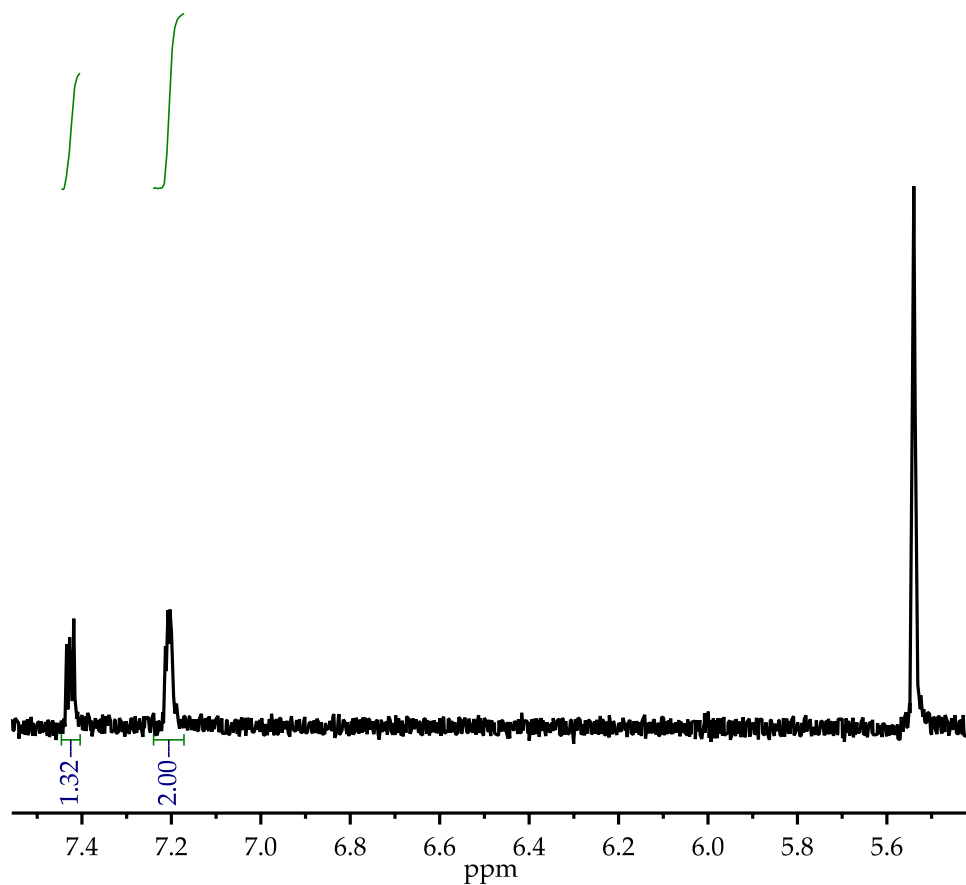

**Figure S-27.** Isolated <sup>1</sup>H NMR spectrum for metalation of 0.38 M 1,2-dichlorobenzene with 0.40 M NaDA in 1.00 mL THF at  $-78\text{ }^{\circ}\text{C}$  after quenching with 500  $\mu\text{L}$  MeOD (100  $\mu\text{L}$  cyclohexene internal standard added at  $\delta$  5.54 ppm). Loss of the resonance at  $\delta$  7.42 ppm indicates ortho selective metalation.

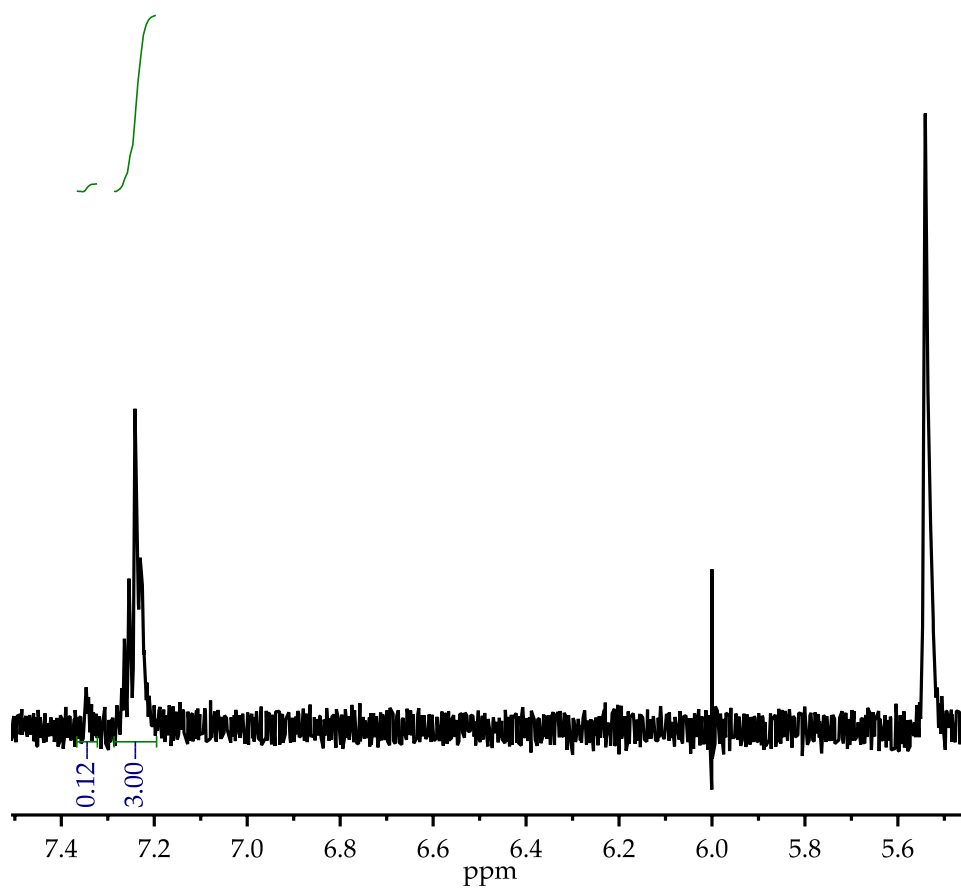

**Figure S-28.** Isolated <sup>1</sup>H NMR spectrum for metalation of 0.38 M 1,3-dichlorobenzene with 0.40 M NaDA in 1.00 mL THF at -78 °C after quenching with 500 μL MeOD (100 μL cyclohexene internal standard added at δ 5.54 ppm). Loss of the resonance at δ 7.35 ppm indicates doubly ortho selective metalation.



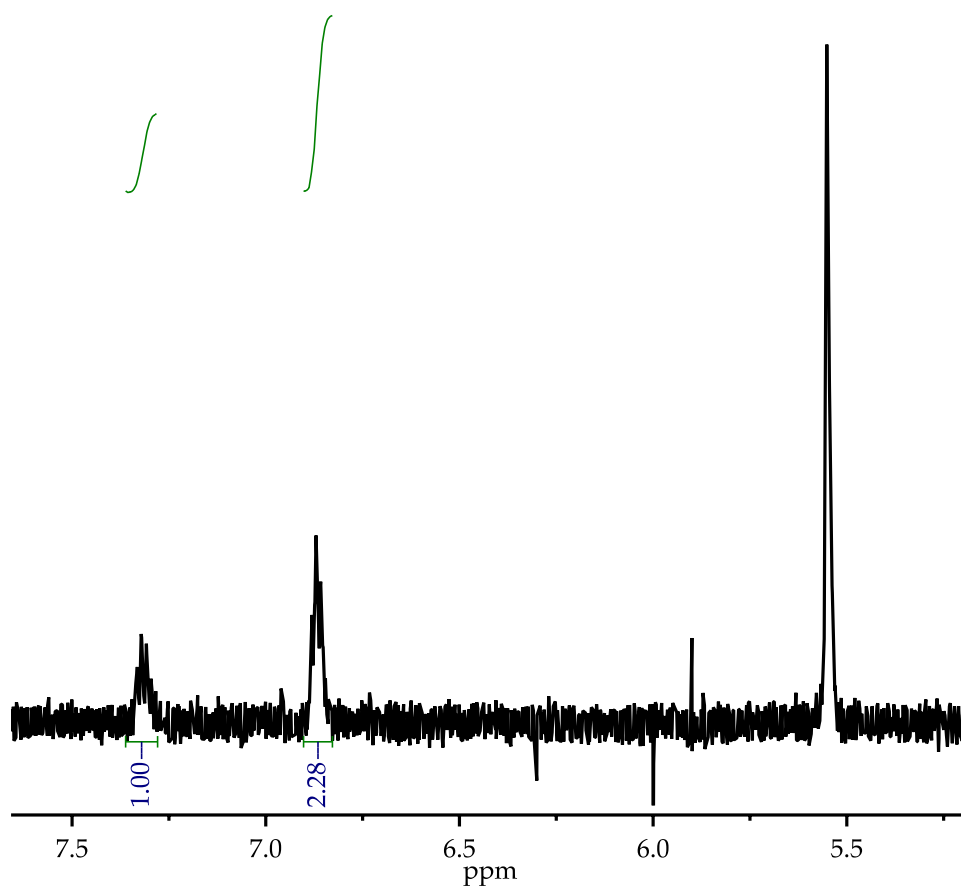

**Figure S-29.** Isolated <sup>1</sup>H NMR spectrum for metalation of 0.38 M 1,3-difluorobenzene with 0.40 M NaDA in 1.00 mL THF at -78 °C after quenching with 500 μL MeOD (100 μL cyclohexene internal standard added at δ 5.54 ppm). Loss of the resonance at δ 6.87 ppm is consistent with doubly ortho selective metalation.

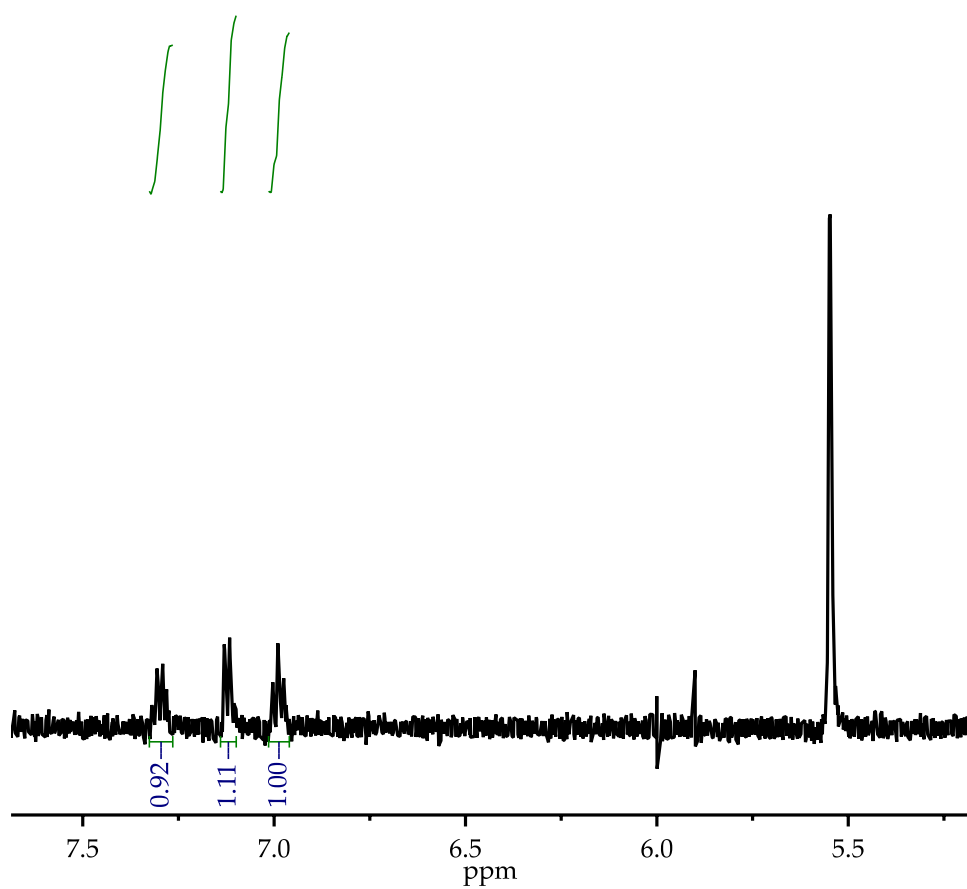

**Figure S-30.** Isolated <sup>1</sup>H NMR spectrum for metalation of 0.38 M 1-chloro-3-fluorobenzene with 0.40 M NaDA in 1.00 mL THF at -78 °C after quenching with 500 μL MeOD (100 μL cyclohexene internal standard added at δ 5.54 ppm). Loss of the resonance at δ 7.11 ppm is consistent with doubly ortho selective metalation.

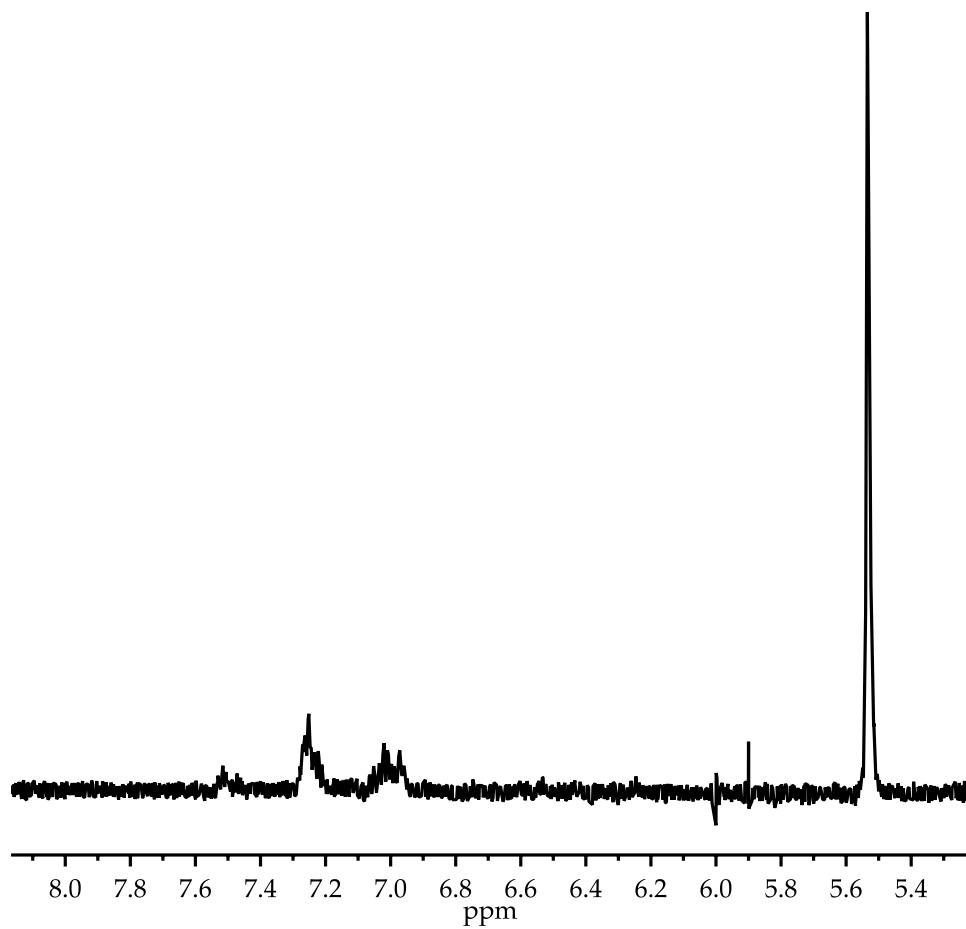

**Figure S-31.** Isolated <sup>1</sup>H NMR spectrum for metalation of 0.38 M 1-bromo-2-fluorobenzene with 0.40 M NaDA in 1.00 mL THF at -78 °C after quenching with 500 μL MeOD (100 μL cyclohexene internal standard added at δ 5.54 ppm). The appearance of extraneous resonances is consistent with decomposition.

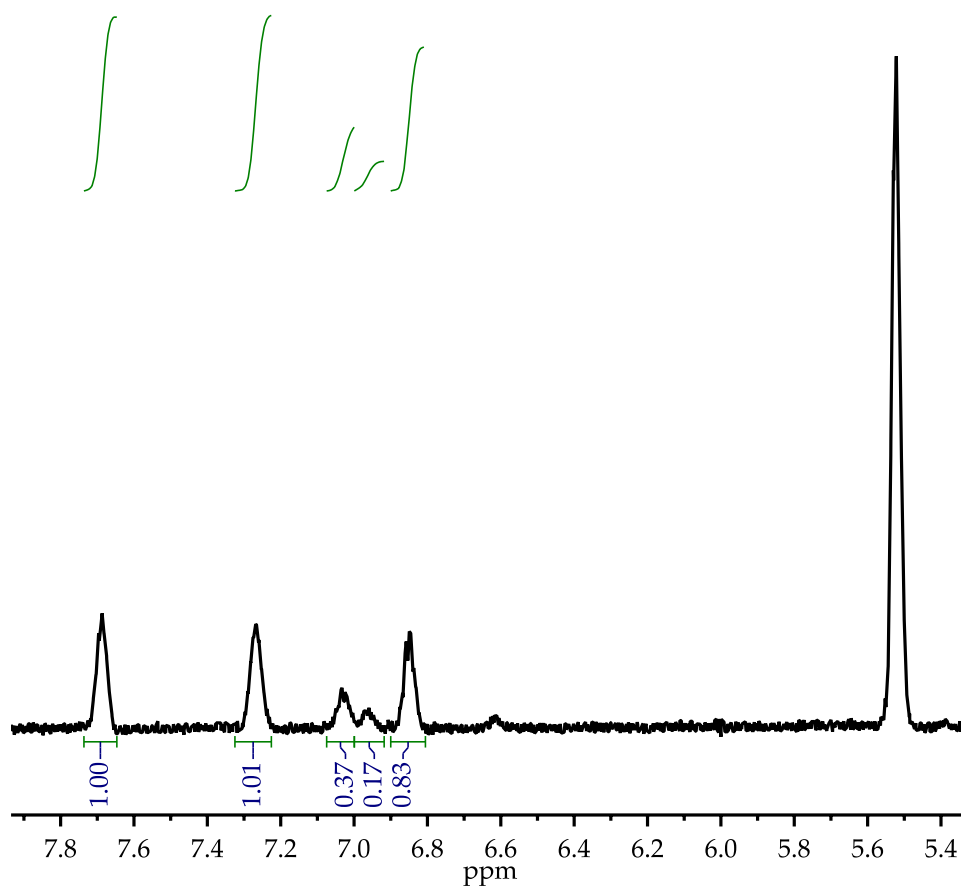

**Figure S-32.** Isolated <sup>1</sup>H NMR spectrum for metalation of 0.38 M 1-fluoro-2-iodobenzene with 0.40 M NaDA in 1.00 mL THF at -78 °C after quenching with 500 μL MeOD (100 μL cyclohexene internal standard added at δ 5.54 ppm).

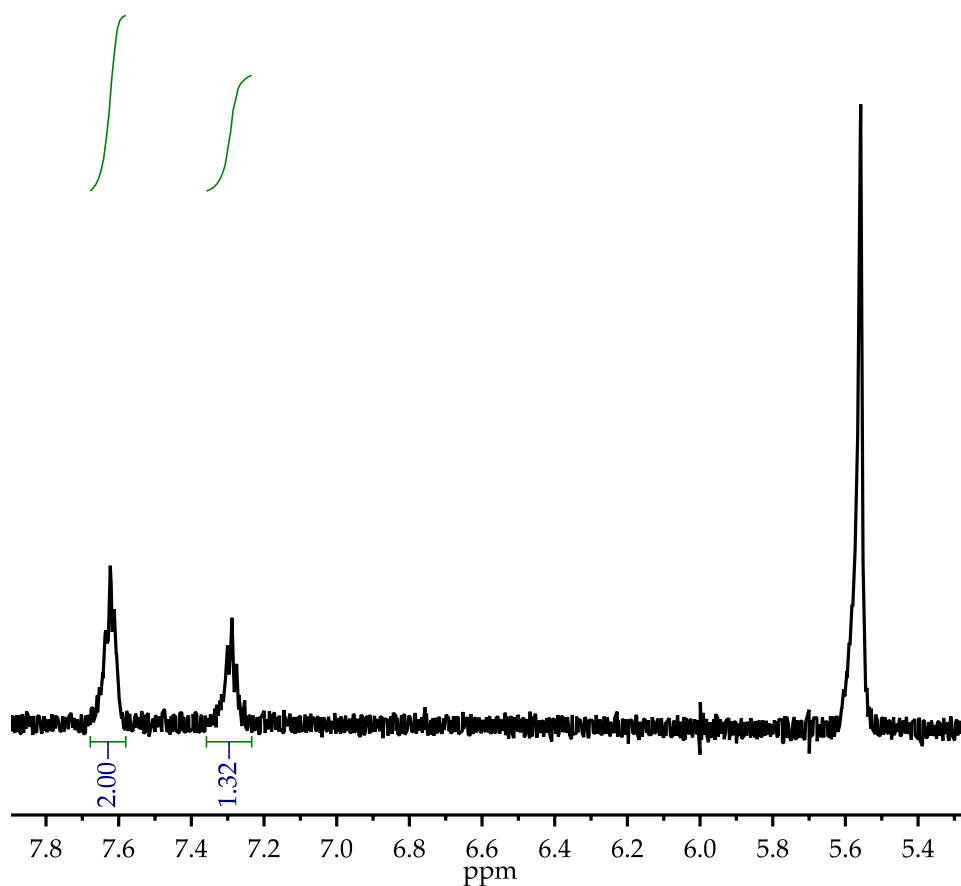

**Figure S-33.** Isolated <sup>1</sup>H NMR spectrum for metalation of 0.38 M 2-fluorobenzotrifluoride with 0.40 M NaDA in 1.00 mL THF at -78 °C after quenching with 500 μL MeOD (100 μL cyclohexene internal standard added at δ 5.54 ppm). Loss of the resonance at δ 7.28 ppm is consistent with selective metalation ortho to fluorine.

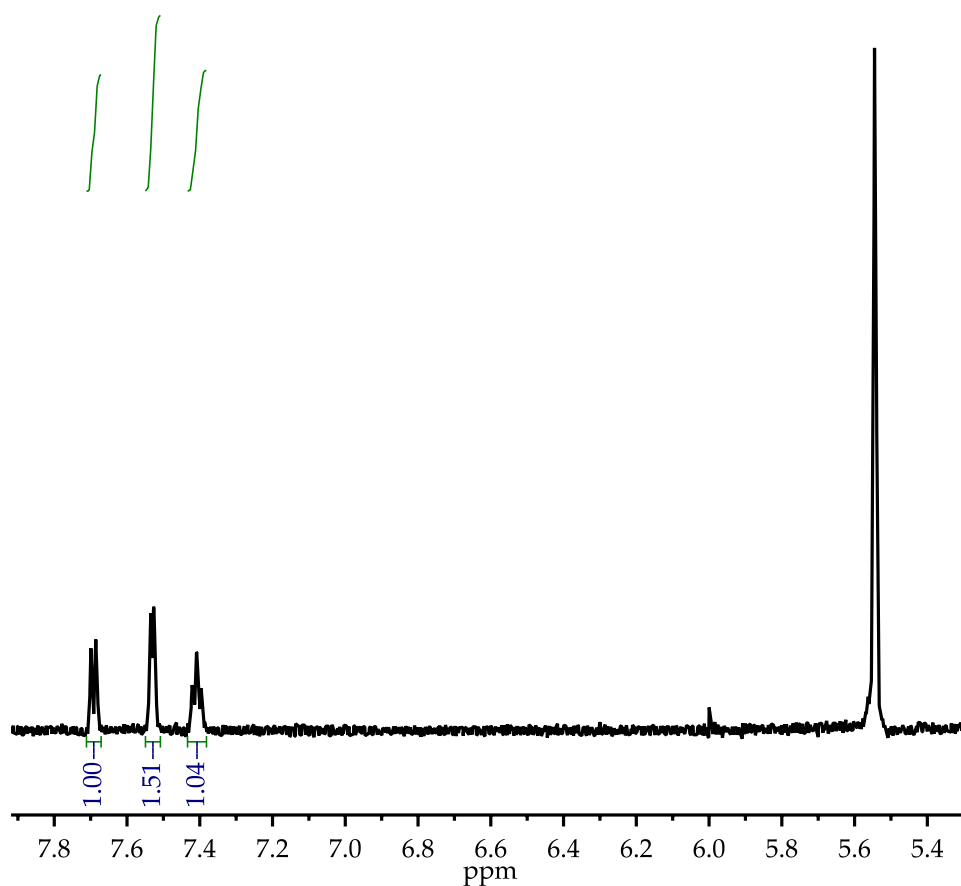

**Figure S-34.** Isolated <sup>1</sup>H NMR spectrum for metalation of 0.38 M 2-chlorobenzotrifluoride with 0.40 M NaDA in 1.00 mL THF at -78 °C after quenching with 500 μL MeOD (100 μL cyclohexene internal standard added at δ 5.54 ppm). Loss of the resonance at δ 7.53 ppm is consistent with selective metalation ortho to chlorine.

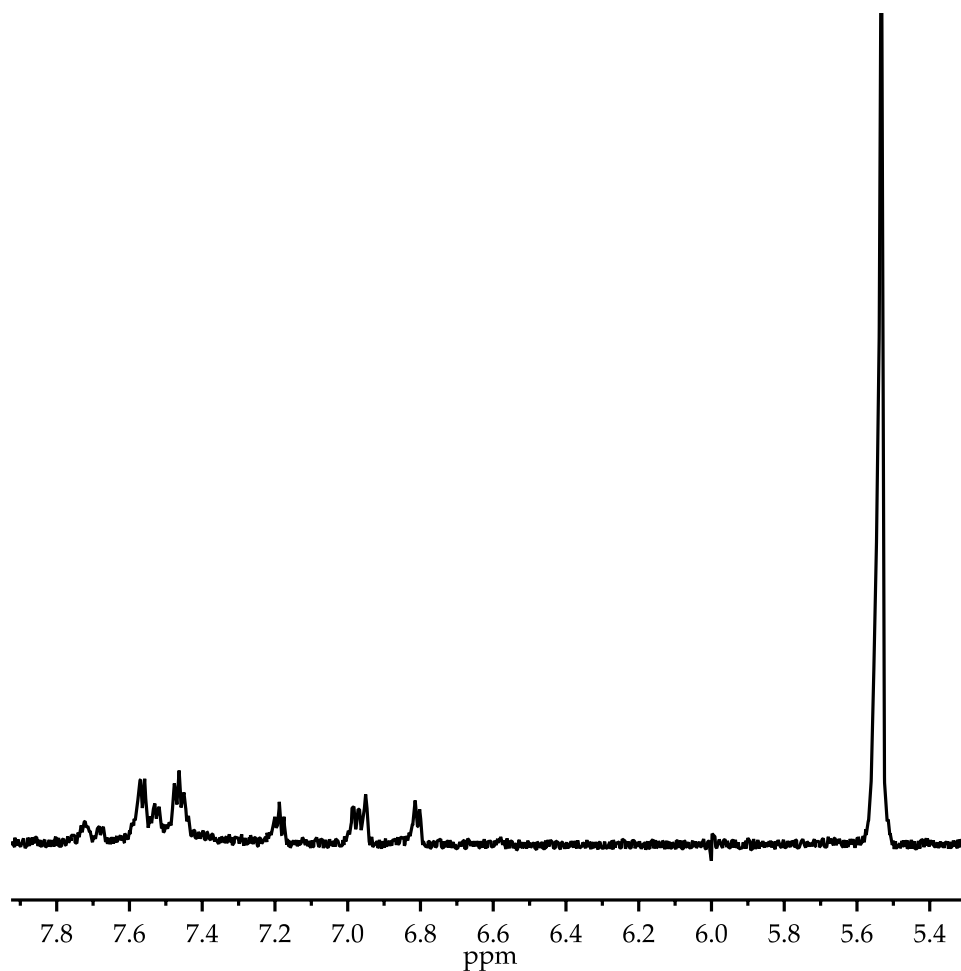

**Figure S-35.** Isolated <sup>1</sup>H NMR spectrum for metalation of 0.38 M 2-bromobenzotrifluoride with 0.40 M NaDA in 1.00 mL THF at -78 °C after quenching with 500 μL MeOD (100 μL cyclohexene internal standard added at δ 5.54 ppm). The appearance of extraneous resonances is consistent with decomposition.

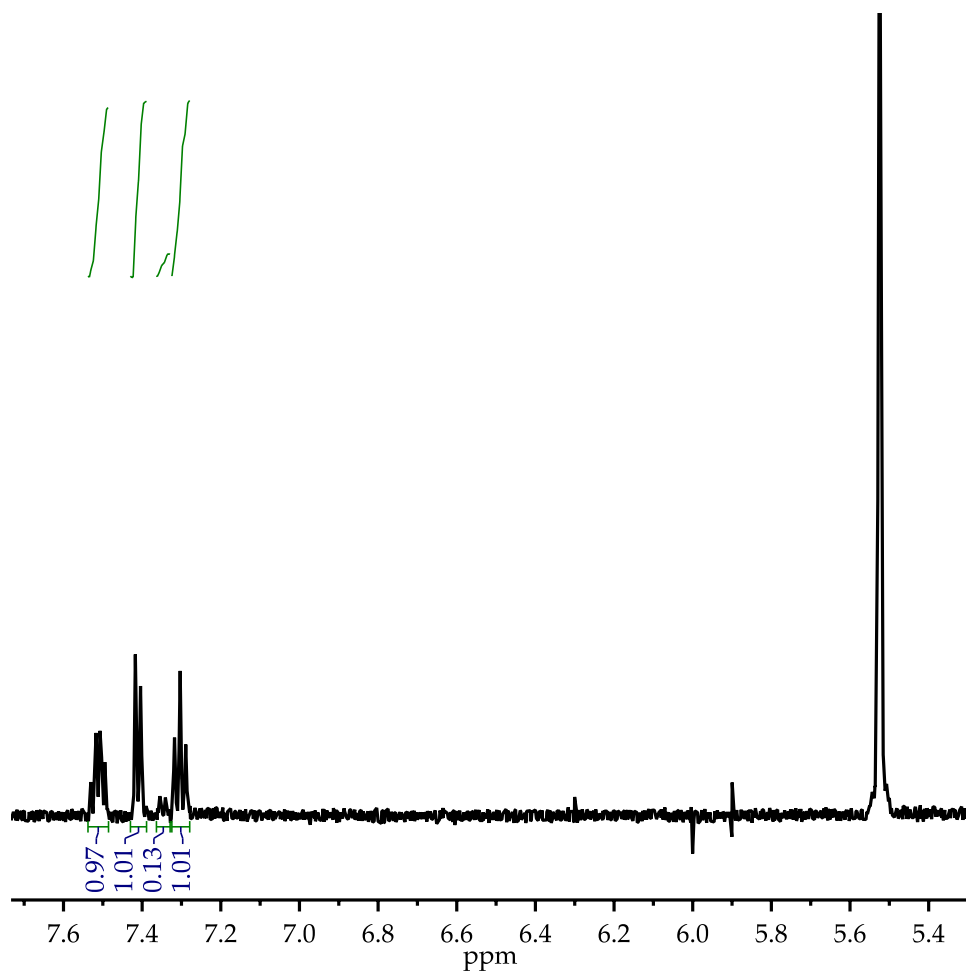

**Figure S-36.** Isolated <sup>1</sup>H NMR spectrum for metalation of 0.38 M 3-fluorobenzotrifluoride with 0.40 M NaDA in 1.00 mL THF at -78 °C after quenching with 500 μL MeOD (100 μL cyclohexene internal standard added at δ 5.54 ppm). Loss of the resonance at δ 7.34 ppm indicates doubly ortho metalation.



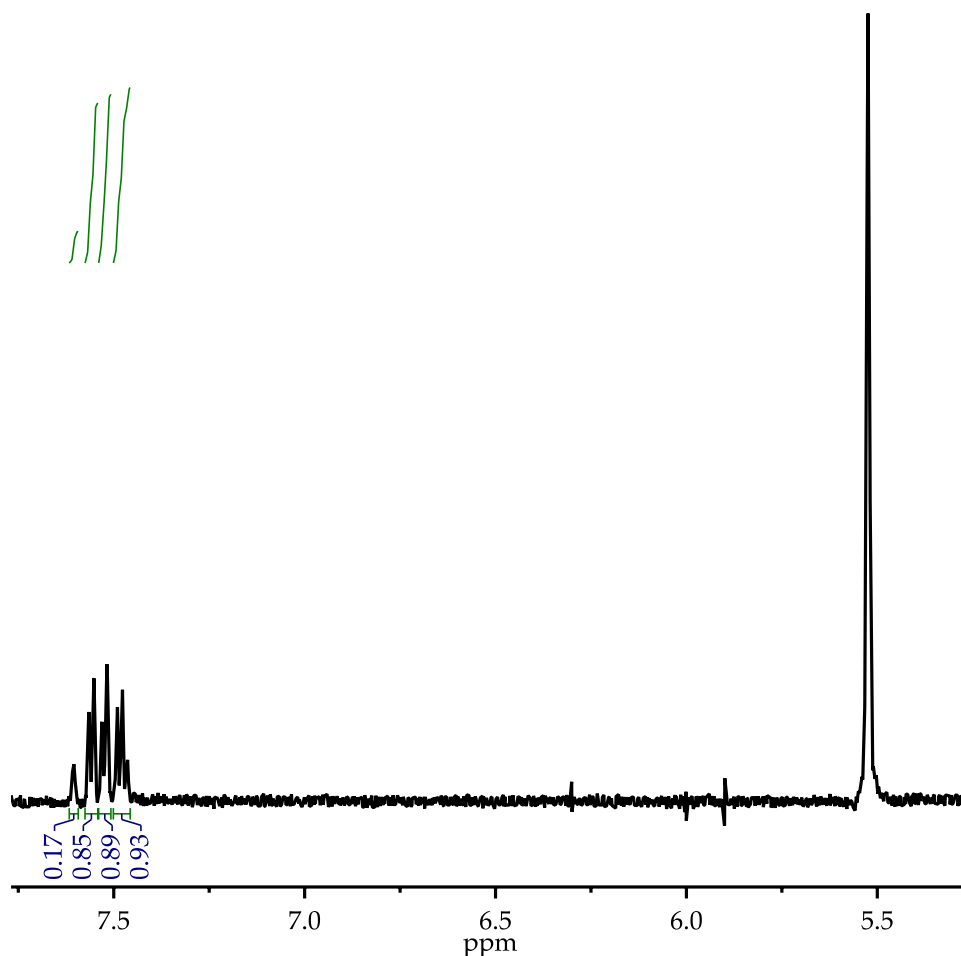

**Figure S-37.** Isolated <sup>1</sup>H NMR spectrum for metalation of 0.38 M 3-chlorobenzotrifluoride with 0.40 M NaDA in 1.00 mL THF at  $-78\text{ }^{\circ}\text{C}$  after quenching with 500  $\mu\text{L}$  MeOD (100  $\mu\text{L}$  cyclohexene internal standard added at  $\delta$  5.54 ppm). Loss of the resonance at  $\delta$  7.60 ppm indicates doubly ortho metalation.

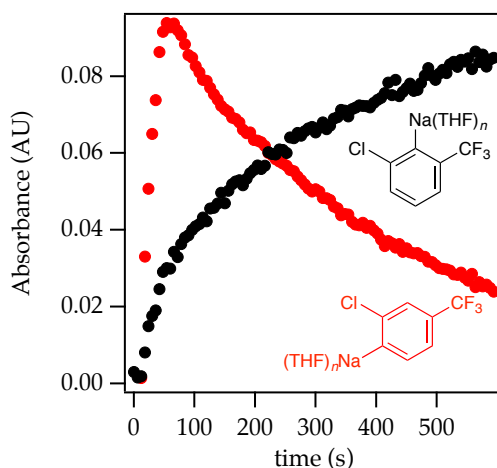

**Figure S-38.** In situ absorbance trace for the metalation of 0.040 M 3-chlorobenzotrifluoride with 0.10 M NaDA in neat THF at  $-116\text{ }^{\circ}\text{C}$ . The rapid burst corresponds to the initial metalation event whereas the subsequent decay corresponds to equilibration of the arylsodiums.

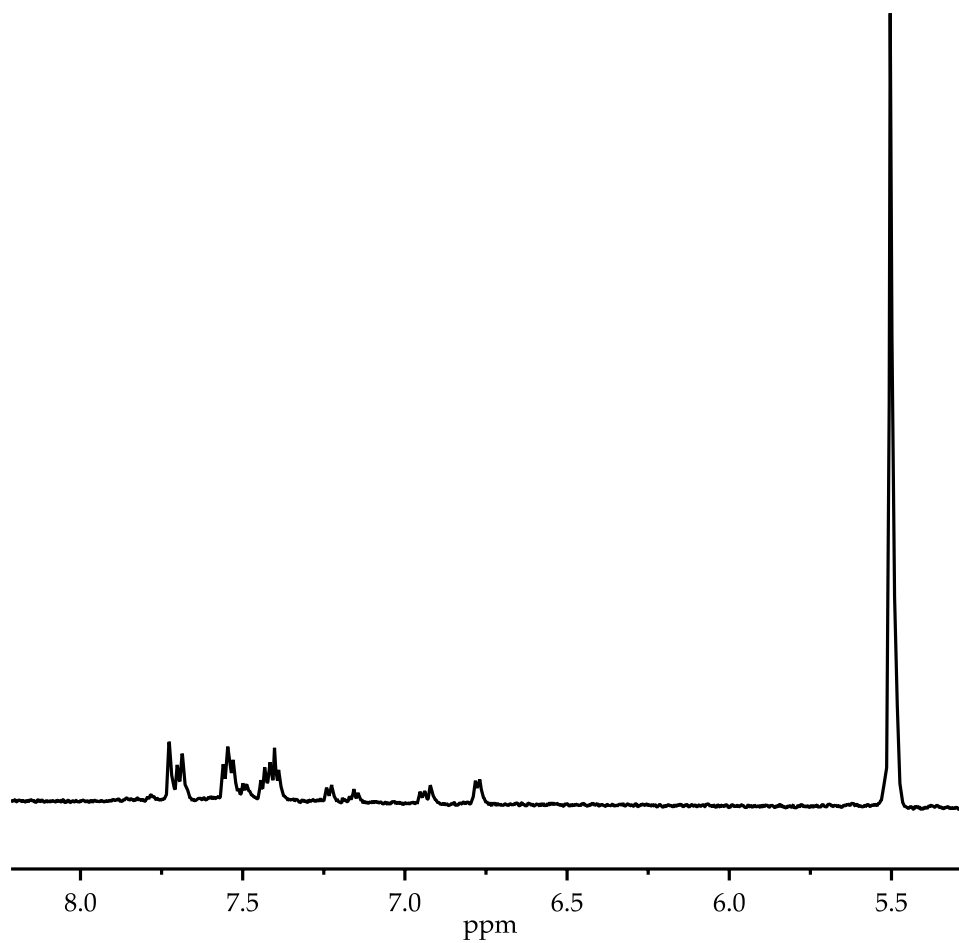

**Figure S-39.** Isolated <sup>1</sup>H NMR spectrum for metalation of 0.38 M 3-bromobenzotrifluoride with 0.40 M NaDA in 1.00 mL THF at  $-78\text{ }^{\circ}\text{C}$  after quenching with 500  $\mu\text{L}$  MeOD (100  $\mu\text{L}$  cyclohexene internal standard added at  $\delta$  5.54 ppm). The appearance of extraneous resonances is consistent with decomposition (possibly isomerization).

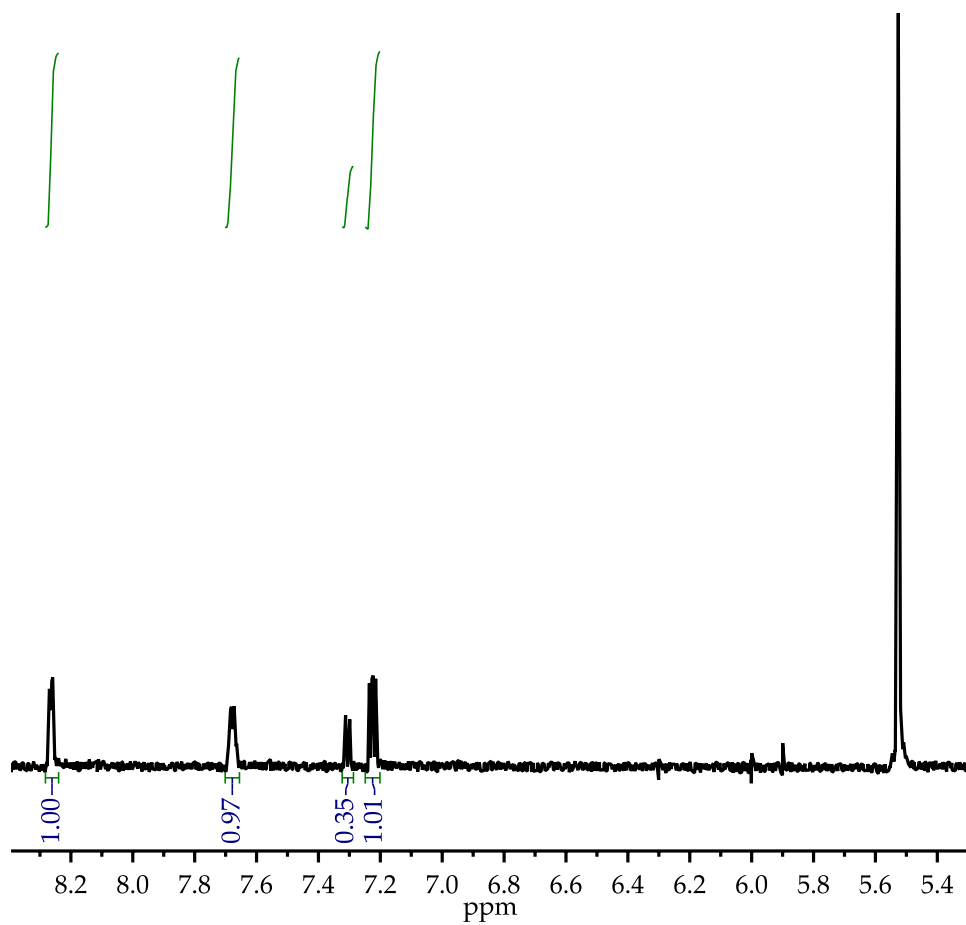

**Figure S-40.** Isolated  $^1\text{H}$  NMR spectrum for metalation of 0.38 M 2-chloropyridine with 0.40 M NaDA in 1.00 mL THF at  $-78^\circ\text{C}$  after quenching with 500  $\mu\text{L}$  MeOD (100  $\mu\text{L}$  cyclohexene internal standard added at  $\delta$  5.54 ppm). Loss of the resonance at  $\delta$  7.31 ppm indicates ortho metalation to chlorine.

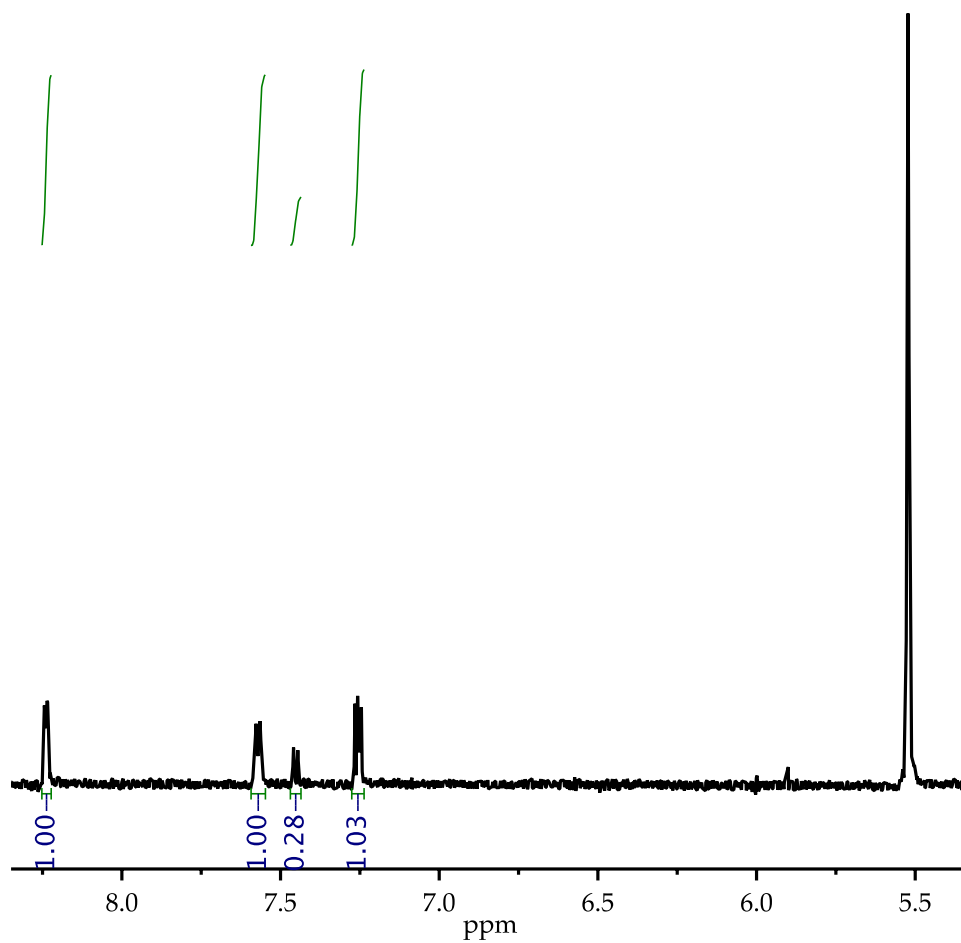

**Figure S-41.** Isolated  $^1\text{H}$  NMR spectrum for metalation of 0.38 M 2-bromopyridine with 0.40 M NaDA in 1.00 mL THF at  $-78\text{ }^\circ\text{C}$  after quenching with 500  $\mu\text{L}$  MeOD (100  $\mu\text{L}$  cyclohexene internal standard added at  $\delta$  5.54 ppm). Loss of the resonance at  $\delta$  7.46 ppm indicates ortho metalation to bromine.

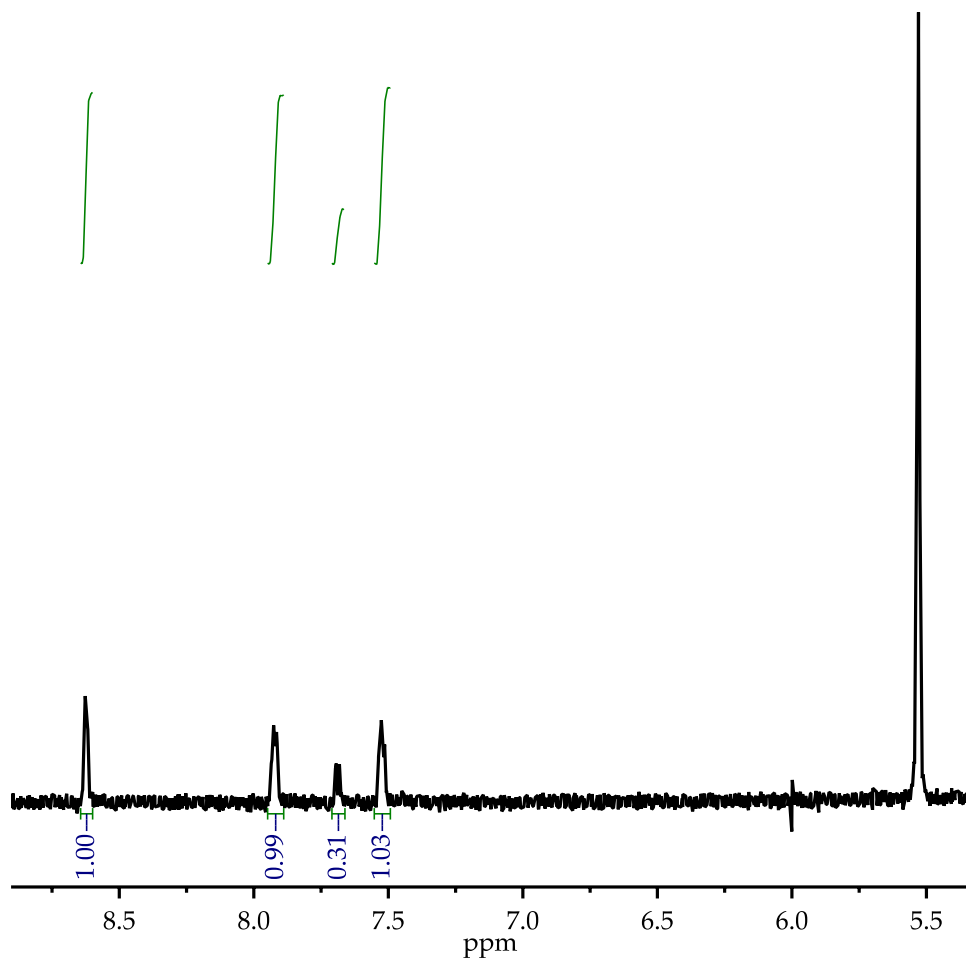

**Figure S-42.** Isolated <sup>1</sup>H NMR spectrum for metalation of 0.38 M 2-(trifluoromethyl)pyridine with 0.40 M NaDA in 1.00 mL THF at -78 °C after quenching with 500 μL MeOD (100 μL cyclohexene internal standard added at δ 5.54 ppm). Loss of the resonance at δ 7.69 ppm indicates ortho metalation to CF<sub>3</sub>.

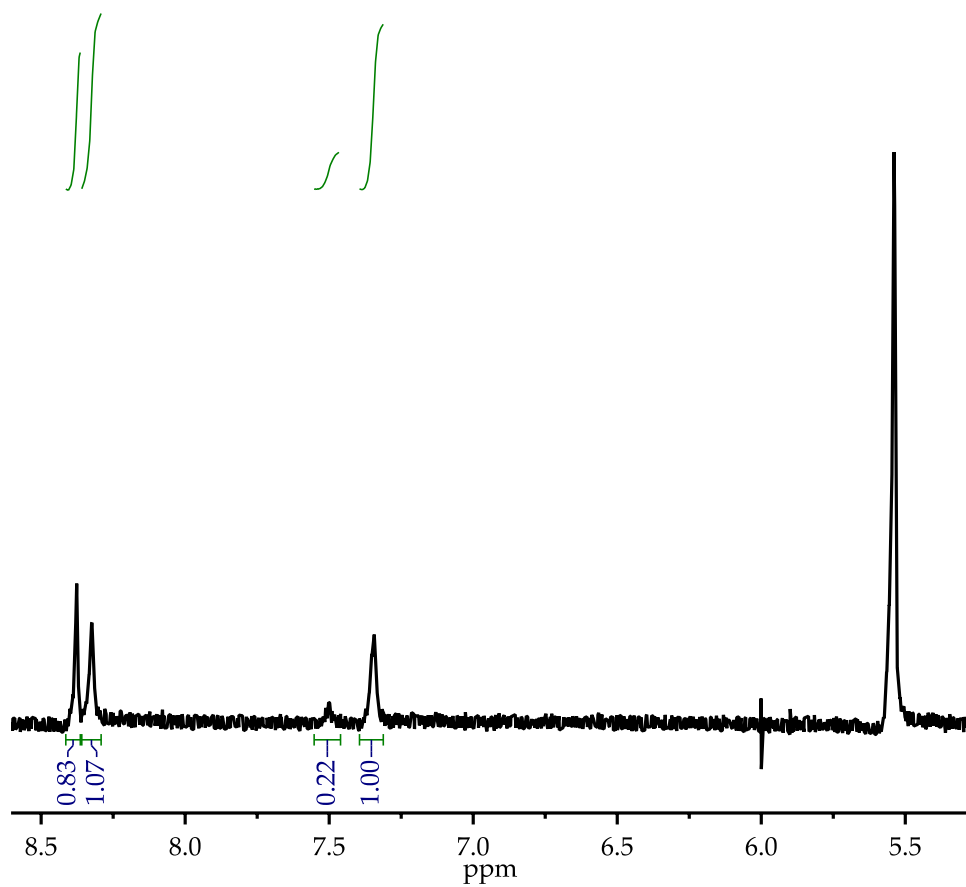

**Figure S-43.** Isolated <sup>1</sup>H NMR spectrum for metalation of 0.38 M 3-fluoropyridine with 0.40 M NaDA in 1.00 mL THF at -78 °C after quenching with 500 μL MeOD (100 μL cyclohexene internal standard added at δ 5.54 ppm). Loss of the resonance at δ 7.5 ppm indicates metalation at the 4 position.

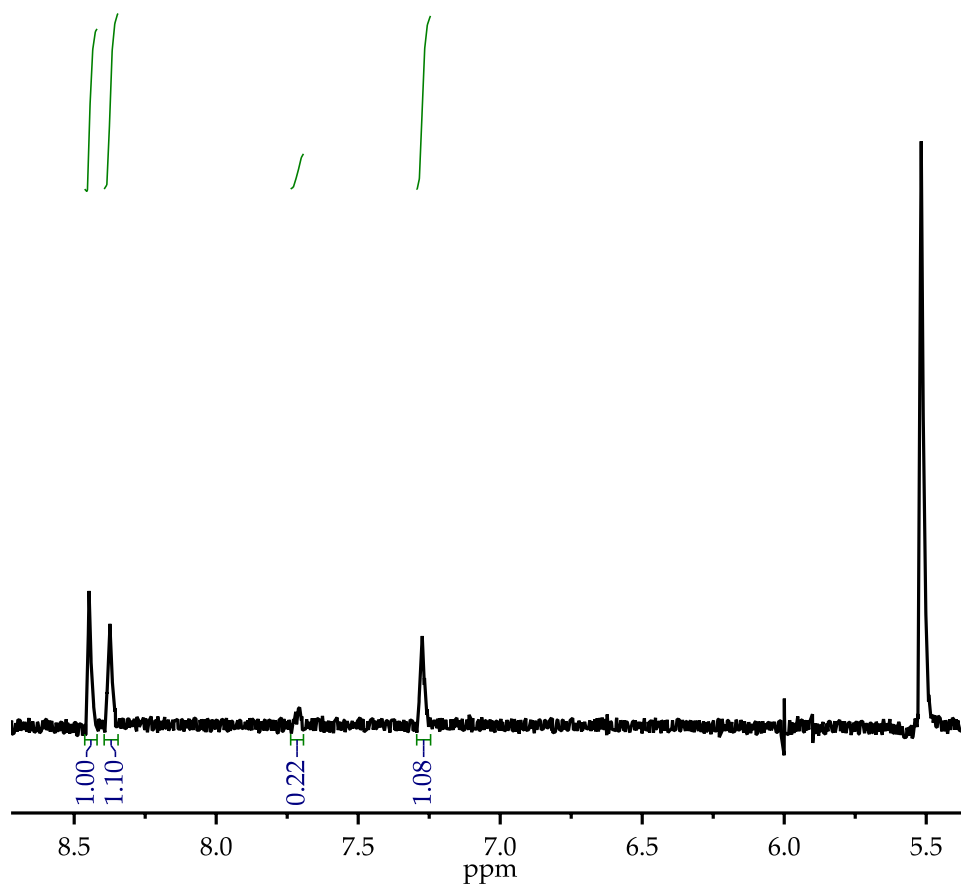

**Figure S-44.** Isolated  $^1\text{H}$  NMR spectrum for metalation of 0.38 M 3-chloropyridine with 0.40 M NaDA in 1.00 mL THF at  $-78\text{ }^\circ\text{C}$  after quenching with 500  $\mu\text{L}$  MeOD (100  $\mu\text{L}$  cyclohexene internal standard added at  $\delta$  5.54 ppm). Loss of the resonance at  $\delta$  7.7 ppm indicates metalation at the 4 position.

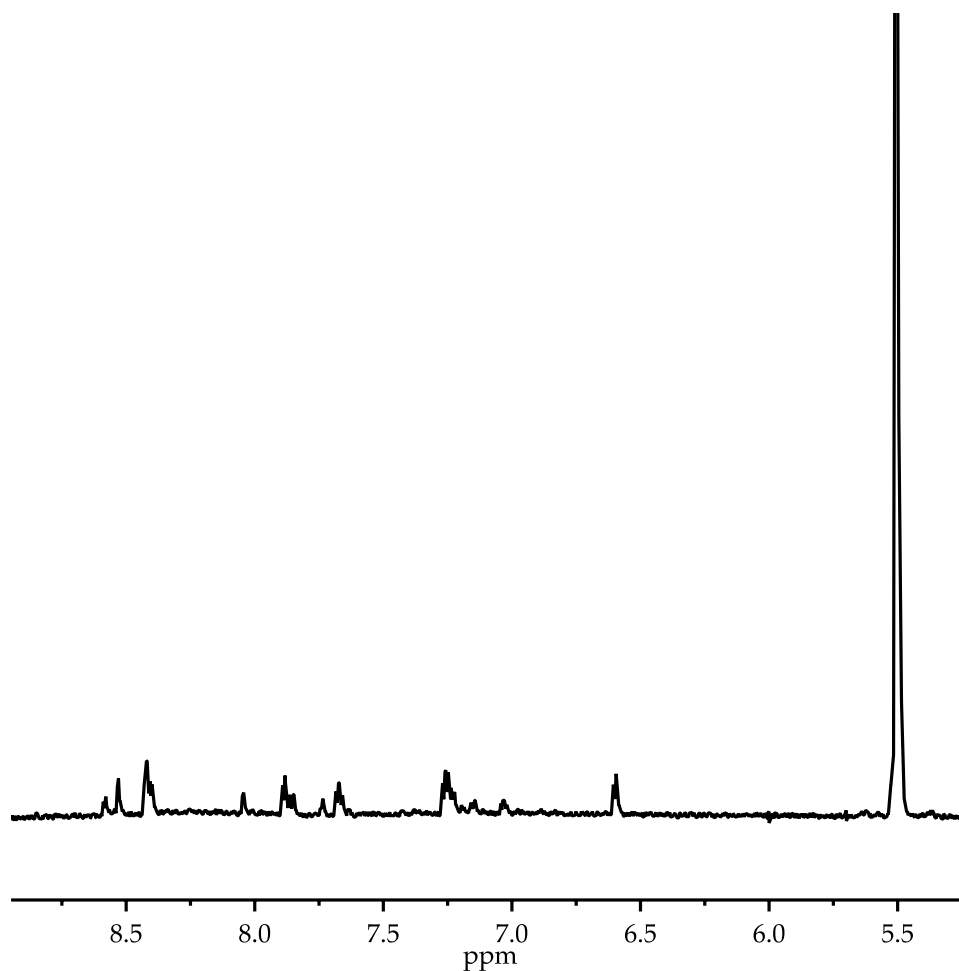

**Figure S-45.** Isolated <sup>1</sup>H NMR spectrum for metalation of 0.38 M 3-bromopyridine with 0.40 M NaDA in 1.00 mL THF at  $-78\text{ }^{\circ}\text{C}$  after quenching with 500  $\mu\text{L}$  MeOD (100  $\mu\text{L}$  cyclohexene internal standard added at  $\delta$  5.54 ppm). The appearance of extraneous resonances is consistent with decomposition (possibly isomerization).



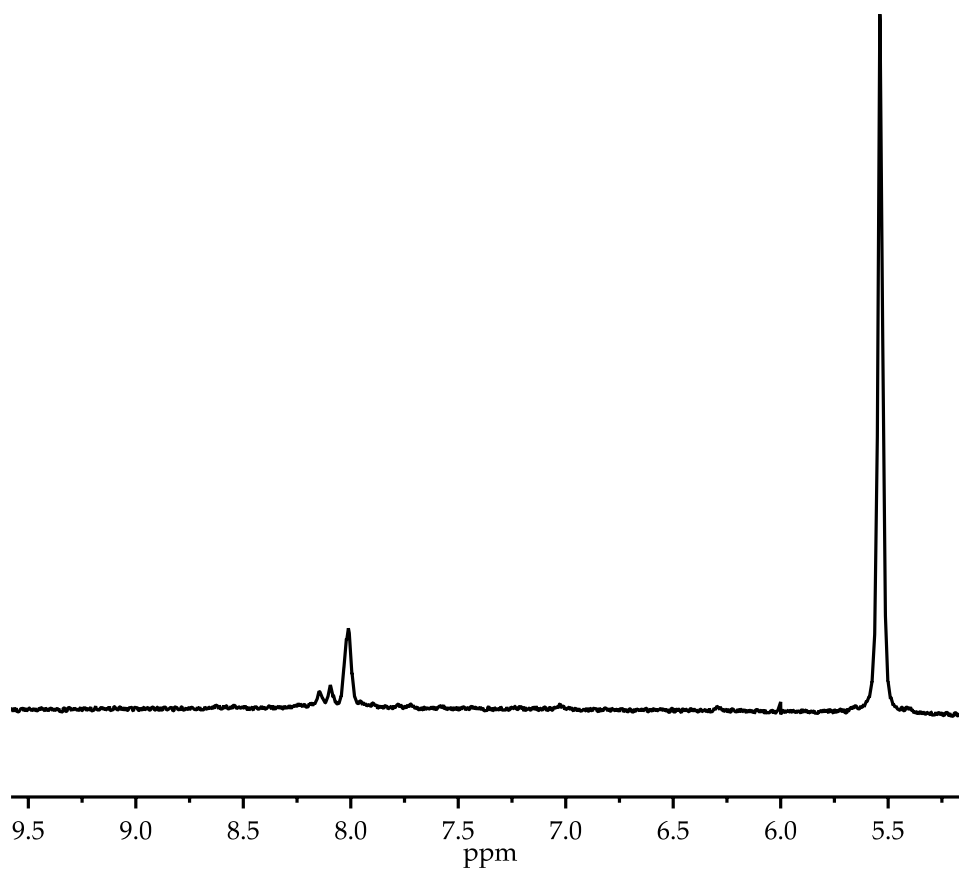

**Figure S-46.** Isolated  $^1\text{H}$  NMR spectrum for metalation of 0.38 M 2-fluoropyrazine with 0.40 M NaDA in 1.00 mL THF at  $-78\text{ }^\circ\text{C}$  after quenching with 500  $\mu\text{L}$  MeOD (100  $\mu\text{L}$  cyclohexene internal standard added at  $\delta$  5.54 ppm). That there are no resonances corresponding to starting material is consistent with decomposition.

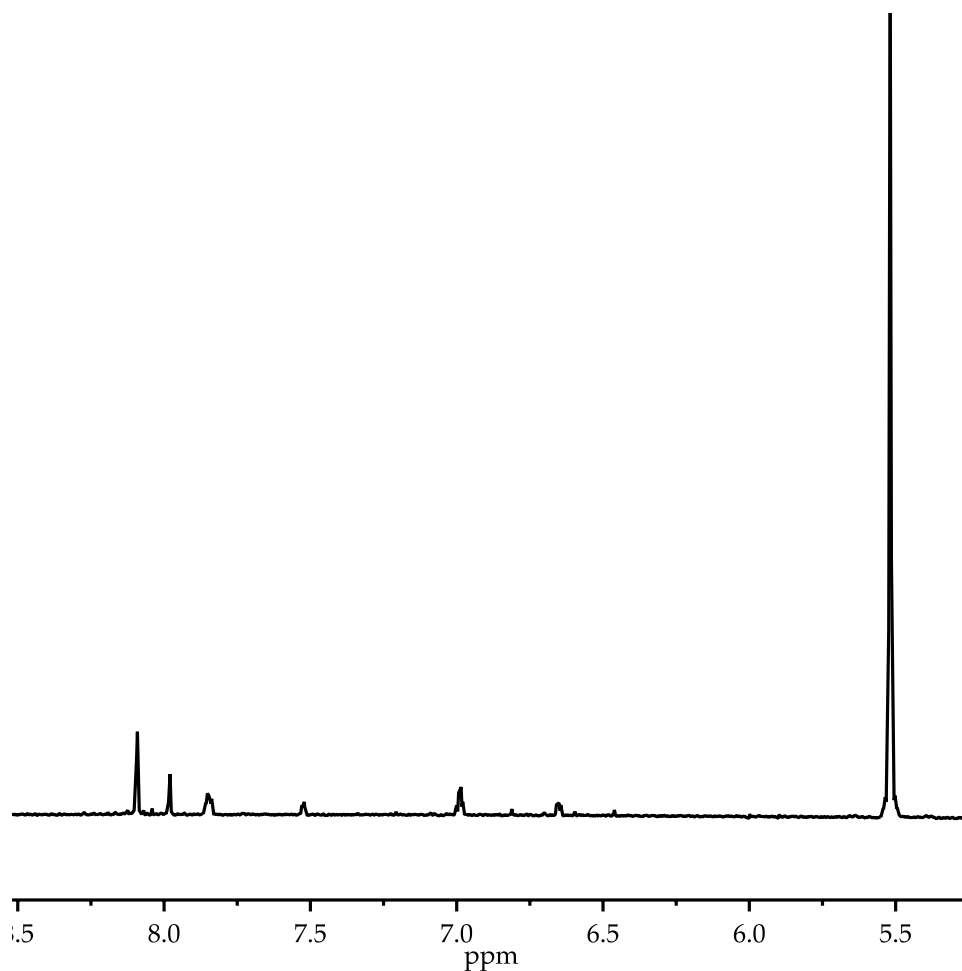

**Figure S-47.** Isolated <sup>1</sup>H NMR spectrum for metalation of 0.38 M 5-chloro-2-fluoropyridine with 0.40 M NaDA in 1.00 mL THF at  $-78$  °C after quenching with 500  $\mu$ L MeOD (100  $\mu$ L cyclohexene internal standard added at  $\delta$  5.54 ppm). That there are no resonances corresponding to starting material is consistent with decomposition (possibly isomerization).

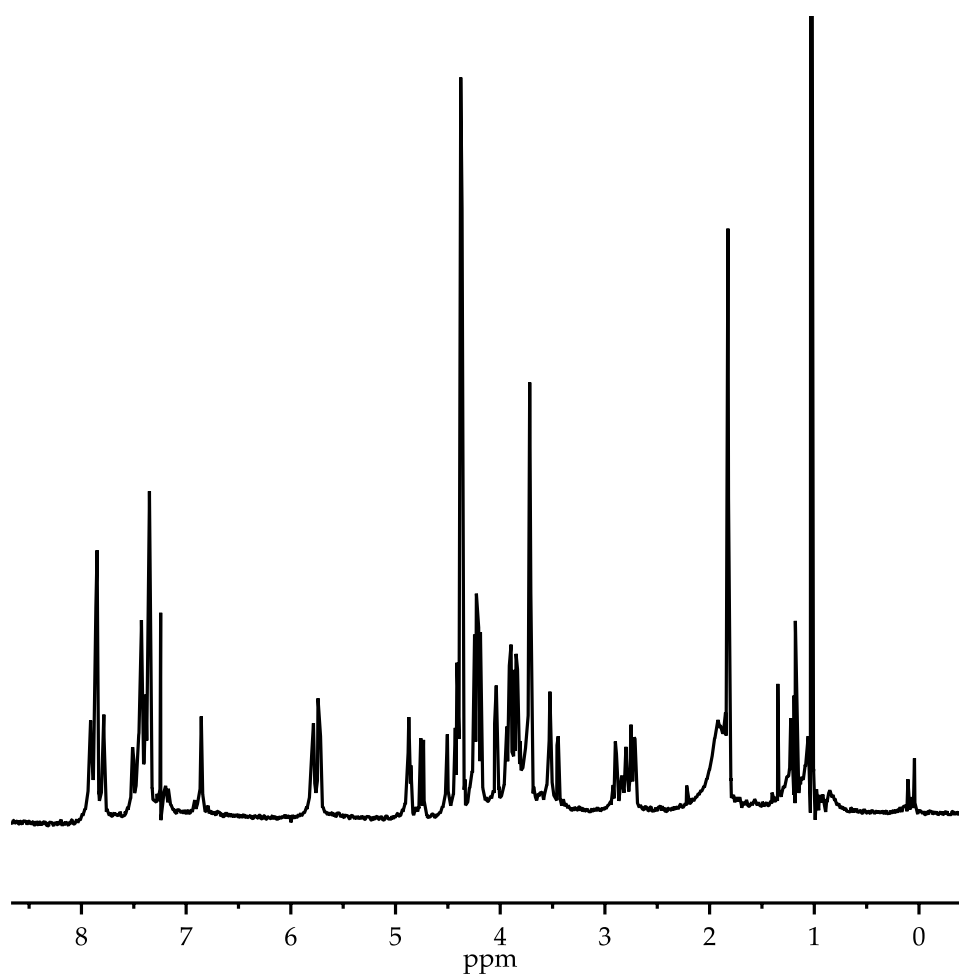

**Figure S-48.** Isolated <sup>1</sup>H NMR spectrum for metalation of 0.20 M 2-phenyl-2-oxazoline with 0.22 M NaDA in 1.00 mL THF at -78 °C after quenching with 200 μL MeOD. That there are no resonances corresponding to starting material is consistent with decomposition (likely due to heterocycle metalation).

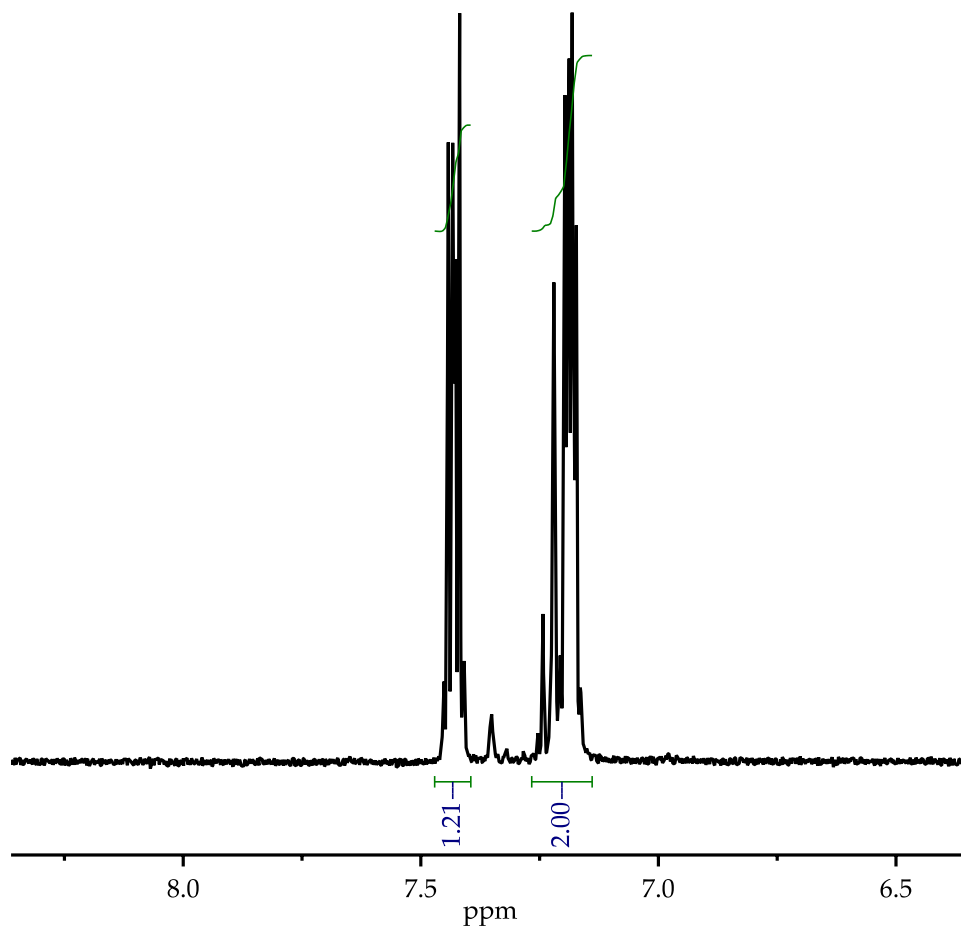

**Figure S-49.** Isolated  $^1\text{H}$  NMR spectrum for metalation (preparative scale) of 0.43 M 1,2-dichlorobenzene with 0.55 M NaDA in 8.00 mL THF/DMEA at  $-78\text{ }^\circ\text{C}$  after quenching with 1.00 mL MeOD.

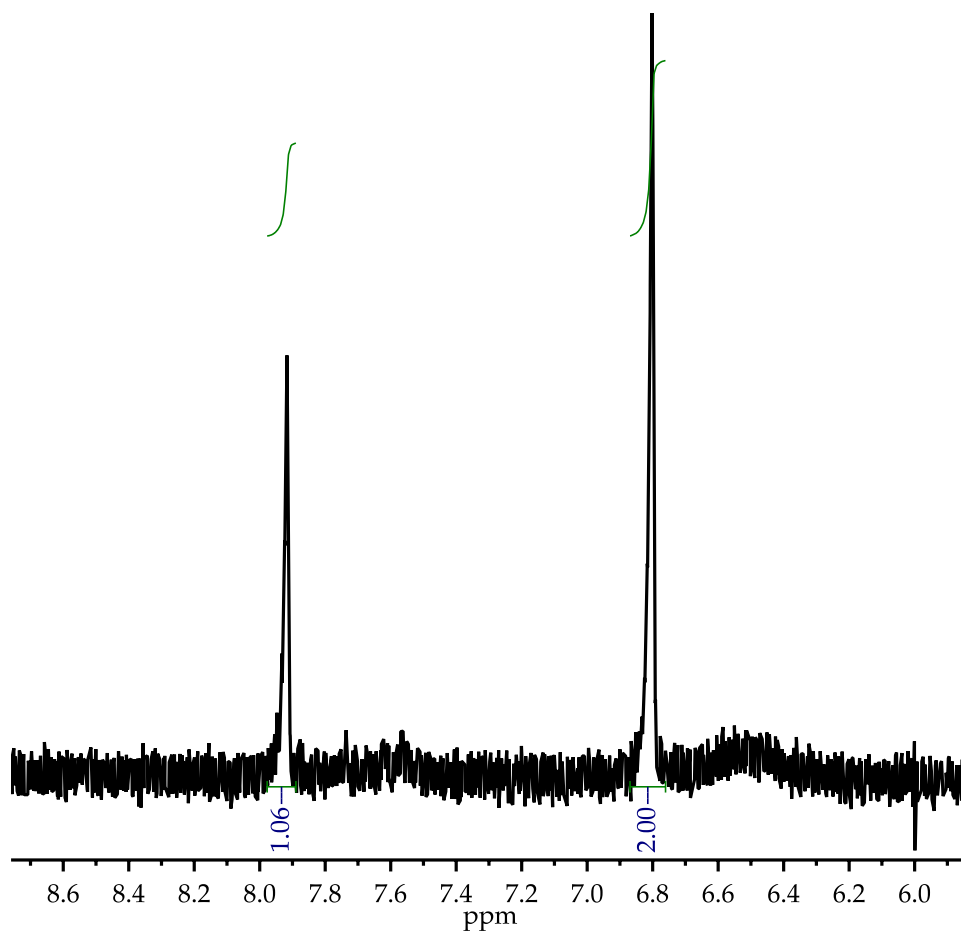

**Figure S-50.** Isolated  $^1\text{H}$  NMR spectrum for metalation of 0.33 M furan with 0.50 M NaDA in 3.00 mL THF/DMEA at  $-78\text{ }^\circ\text{C}$  after quenching with 1.00 mL MeOD. Loss of the resonance at  $\delta$  7.9 ppm indicates metalation at the ortho position.

### III. Computations

Geometries are optimized at the B3LYP level of theory using the 6-31G(d) basis set. Energies are defined as follows:  $G$  is the sum of electronic and thermal free energies calculated at the B3LYP level of theory.  $G_{\text{MP2}}$  is derived from a MP2 single point calculation corresponding to the DFT-optimized geometry and includes a thermal correction from the DFT calculation.

**Table S-1.** Geometric coordinates and thermally corrected MP2 energies for benzene.

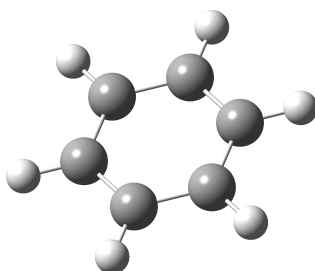

$G = -232.175329$  Hartree  
 $G_{\text{MP2}} = -231.384408$  Hartree

| Atom | X           | Y           | Z           |
|------|-------------|-------------|-------------|
| C    | 0.00000000  | 0.00000000  | 0.00000000  |
| C    | -1.31606100 | -0.46743600 | -0.00008800 |
| C    | -2.37885200 | 0.43829200  | 0.00007500  |
| C    | -2.12569900 | 1.81175800  | -0.00000800 |
| C    | -0.80983000 | 2.27912400  | -0.00007100 |
| C    | 0.25311600  | 1.37327300  | 0.00008000  |
| H    | 1.27700800  | 1.73720900  | 0.00009300  |
| H    | -0.61278400 | 3.34777000  | -0.00003700 |
| H    | -2.95276200 | 2.51656500  | 0.00001500  |
| H    | -3.40282600 | 0.07461100  | 0.00019900  |
| H    | -1.51286400 | -1.53613500 | -0.00006500 |
| H    | 0.82689200  | -0.70501800 | 0.00007500  |

**Table S-2.** Geometric coordinates and thermally corrected MP2 energies for [A(THF)<sub>2</sub>(benzene)]<sup>‡</sup>.

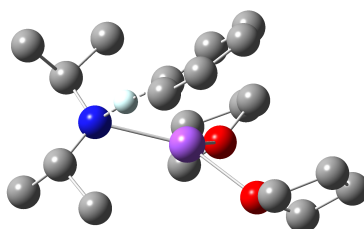

G = -1150.818289 Hartree  
 G<sub>MP2</sub> = -1146.981102 Hartree

| Atom | X           | Y          | Z           |   | X           | Y           | Z           |
|------|-------------|------------|-------------|---|-------------|-------------|-------------|
|      |             |            |             | H | -4.71712100 | 3.40589800  | 0.81427300  |
|      |             |            |             | H | -4.37918600 | 2.35325500  | -0.59301000 |
| C    | 0.00000000  | 0.00000000 | 0.00000000  | C | 0.90458100  | 0.25095500  | -2.28502300 |
| N    | -0.07521700 | 0.69649400 | -1.28704100 | C | 0.76065800  | -1.23199200 | -2.69440500 |
| Na   | -1.32079800 | 2.68866900 | -1.29831200 | H | 1.50881000  | -1.50900700 | -3.44874200 |
| O    | -0.06676300 | 4.59724200 | -1.86091400 | H | -0.23560700 | -1.41795400 | -3.11307100 |
| C    | 1.25636500  | 4.67242300 | -1.27189500 | H | 0.89453200  | -1.90360800 | -1.83911700 |
| H    | 1.52139000  | 3.67398400 | -0.91148600 | C | 0.80273400  | 1.13920800  | -3.53453000 |
| H    | 1.21923200  | 5.36354400 | -0.41924000 | H | 1.56746600  | 0.87049800  | -4.27385300 |
| C    | 2.17424400  | 5.19230400 | -2.37950400 | H | 0.94290200  | 2.19564000  | -3.27040500 |
| H    | 3.04122700  | 5.72982800 | -1.98456100 | H | -0.17723800 | 1.03191900  | -4.01345700 |
| H    | 2.53774400  | 4.36101400 | -2.99394100 | H | 1.92996100  | 0.37974600  | -1.89539200 |
| C    | 1.22309000  | 6.08490400 | -3.19189700 | C | 1.36841900  | 0.12147800  | 0.69685900  |
| H    | 1.55775200  | 6.25237300 | -4.21973300 | H | 1.34665500  | -0.35624100 | 1.68496000  |
| H    | 1.10706200  | 7.06195700 | -2.70813800 | H | 1.63052100  | 1.18005600  | 0.83285400  |
| C    | -0.08632900 | 5.29499900 | -3.12771900 | H | 2.17174200  | -0.35204900 | 0.12305700  |
| H    | -0.98046800 | 5.92606000 | -3.15875800 | C | -1.08874100 | 0.54614900  | 0.93811600  |
| H    | -0.15017500 | 4.55503400 | -3.93613100 | H | -1.12395400 | -0.02287200 | 1.87509400  |
| O    | -3.03147000 | 3.87635400 | -0.30291700 | H | -2.08018600 | 0.49235100  | 0.47612700  |
| C    | -3.13151600 | 5.30493700 | -0.23080000 | H | -0.88449900 | 1.59541400  | 1.20289800  |
| H    | -2.19437600 | 5.71405300 | -0.61501500 | H | -0.20173000 | -1.08438400 | -0.11128100 |
| H    | -3.24738300 | 5.60736200 | 0.82092000  | C | -2.98907500 | 1.49040100  | -3.46371500 |
| C    | -4.38211500 | 5.67430000 | -1.05583800 | C | -4.27204300 | 1.50864300  | -4.03045100 |
| H    | -4.93701600 | 6.49331000 | -0.58830500 | C | -5.27191700 | 0.69152100  | -3.50042700 |
| H    | -4.10542000 | 5.99818100 | -2.06390400 | C | -4.97155700 | -0.13451700 | -2.41221900 |
| C    | -5.19818100 | 4.35170800 | -1.10643900 | C | -3.68605500 | -0.12260000 | -1.85977200 |
| H    | -5.25772700 | 3.96884100 | -2.12849600 | C | -2.64232200 | 0.68741000  | -2.35641900 |
| H    | -6.21900600 | 4.47195600 | -0.73202900 | H | -3.49145600 | -0.78311100 | -1.01144300 |
| C    | -4.38336000 | 3.38368000 | -0.23402800 | H | -5.74141700 | -0.78663800 | -2.00099200 |

H -6.26883500 0.68781400 -3.93596000  
H -4.48785200 2.14462700 -4.88885500  
H -1.27657600 0.58224300 -1.80066800  
H -2.22793300 2.12440600 -3.93459200



**Table S-3.** Geometric coordinates and thermally corrected MP2 energies for [A(THF)<sub>3</sub>(benzene)]<sup>‡</sup>.

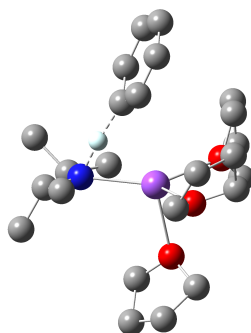

G = -1383.16906 Hartree  
G<sub>MP2</sub> = -1378.565616 Hartree

| Atom | X           | Y           | Z           | Atom | X           | Y           | Z           |
|------|-------------|-------------|-------------|------|-------------|-------------|-------------|
| Na   | 0.00000000  | 0.00000000  | 0.00000000  | H    | -1.08450100 | 1.24947400  | 3.89989500  |
| N    | 0.44578400  | 2.19724800  | -0.92002000 | C    | -2.92005700 | 0.29667500  | 3.17136800  |
| C    | 0.98423600  | 2.44241800  | -2.26173900 | H    | -3.12808200 | 1.29542800  | 2.77921800  |
| C    | 2.46474200  | 2.86871800  | -2.28428200 | H    | -3.76979700 | -0.00137700 | 3.79300900  |
| H    | 2.81561800  | 2.99335500  | -3.31688100 | C    | -2.69798500 | -0.69400000 | 2.01300000  |
| H    | 3.09052900  | 2.10416500  | -1.80326600 | H    | -3.10810100 | -1.68658800 | 2.25489800  |
| H    | 2.63580500  | 3.81788100  | -1.76572000 | H    | -3.09599700 | -0.35649000 | 1.05604600  |
| C    | 0.81668400  | 1.17768800  | -3.11498500 | O    | 0.05646700  | -2.26209100 | -0.95842000 |
| H    | 1.15220800  | 1.34863800  | -4.14564100 | C    | -0.75632600 | -3.28174300 | -0.35371100 |
| H    | -0.23049000 | 0.86257500  | -3.14928900 | H    | -1.13455000 | -2.87519300 | 0.58492500  |
| H    | 1.41912300  | 0.35693600  | -2.69828600 | H    | -0.13603500 | -4.16861000 | -0.14407400 |
| H    | 0.42097200  | 3.24238200  | -2.78265300 | C    | -1.82613100 | -3.58765600 | -1.40501500 |
| C    | 0.55120600  | 3.34807700  | -0.01228300 | H    | -2.24526900 | -4.59242600 | -1.29477600 |
| C    | -0.19557200 | 4.61673600  | -0.48333000 | H    | -2.64095200 | -2.86280100 | -1.32061300 |
| H    | -0.08348100 | 5.43181900  | 0.24377100  | C    | -1.06611400 | -3.39381100 | -2.74274200 |
| H    | -1.26537600 | 4.41361100  | -0.60969500 | H    | -1.65451000 | -2.80350900 | -3.45038000 |
| H    | 0.18733700  | 4.98066000  | -1.44300700 | H    | -0.83425900 | -4.34978000 | -3.22252500 |
| C    | 0.05776400  | 2.94703900  | 1.38743500  | C    | 0.23249000  | -2.65877400 | -2.33023800 |
| H    | 0.14835600  | 3.78303800  | 2.09220500  | H    | 1.10474600  | -3.32478900 | -2.40250800 |
| H    | 0.64633700  | 2.11036300  | 1.78508600  | H    | 0.43366600  | -1.75511500 | -2.90799200 |
| H    | -0.99443200 | 2.64224300  | 1.36283900  | O    | 2.07643900  | -0.49510800 | 1.15402600  |
| H    | 1.61137400  | 3.63580600  | 0.10999300  | C    | 2.72197800  | -1.77444700 | 1.11304200  |
| O    | -1.26792300 | -0.80520900 | 1.87405500  | H    | 1.98593000  | -2.49828900 | 0.75910300  |
| C    | -0.74336000 | -0.78533100 | 3.20939800  | H    | 3.06080500  | -2.05935100 | 2.12207800  |
| H    | 0.32289600  | -0.56245600 | 3.13507600  | C    | 3.90494700  | -1.56990400 | 0.16815600  |
| H    | -0.87085100 | -1.78030000 | 3.66509900  | H    | 4.68865900  | -2.32323500 | 0.29506100  |
| C    | -1.57565700 | 0.27359600  | 3.95194900  | H    | 3.55519500  | -1.60996800 | -0.86934300 |
| H    | -1.70281600 | 0.01888800  | 5.00860800  | C    | 4.37224500  | -0.14449500 | 0.53208800  |
|      |             |             |             | H    | 4.75628000  | 0.39858000  | -0.33616300 |

H 5.17110800 -0.17757200 1.28036600  
C 3.10384200 0.52341000 1.11674500  
H 3.27716100 0.89686700 2.13462300  
H 2.71126300 1.33318600 0.49848000  
C -2.66437500 0.24976900 -1.85262100  
C -4.01771600 -0.10617900 -1.94584500  
C -4.97808400 0.62699000 -1.24597400  
C -4.56642200 1.71416800 -0.46968900  
C -3.20762300 2.04095900 -0.39138200  
C -2.19608600 1.32610600 -1.06883200  
H -2.93375600 2.90246500 0.22233200  
H -5.30699400 2.30584500 0.06786000  
H -6.03177400 0.36514400 -1.31566700  
H -4.32590100 -0.94423800 -2.57135300  
H -0.80687600 1.84219000 -1.03040700  
H -1.95312900 -0.34489600 -2.43331200

**Table S-4.** Geometric coordinates and thermally corrected MP2 energies for *N,N*-dimethylaniline.

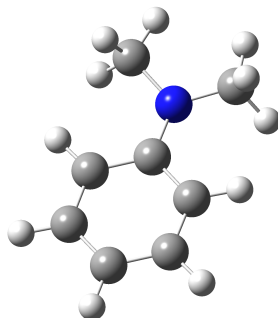

$G = -366.074355$  Hartree  
 $G_{\text{MP2}} = -364.8242641$  Hartree

| Atom | X           | Y           | Z           |
|------|-------------|-------------|-------------|
| C    | 0.00000000  | 0.00000000  | 0.00000000  |
| N    | 0.72012000  | -1.24344700 | -0.21151800 |
| C    | 2.11168500  | -1.24343500 | -0.12852700 |
| C    | 2.84535500  | -2.45103800 | -0.09125700 |
| C    | 4.23729500  | -2.44166400 | -0.04358300 |
| C    | 4.95132500  | -1.24331800 | -0.02116700 |
| C    | 4.23718200  | -0.04502800 | -0.04304200 |
| C    | 2.84524100  | -0.03576900 | -0.09070800 |
| H    | 2.33087100  | 0.91782900  | -0.09814900 |
| H    | 4.76644500  | 0.90462400  | -0.01759100 |
| H    | 6.03658400  | -1.24327200 | 0.01855300  |
| H    | 4.76664100  | -3.39128200 | -0.01857800 |
| H    | 2.33109200  | -3.40468900 | -0.09920300 |
| C    | -0.00012200 | -2.48667000 | 0.00099000  |
| H    | -1.07047000 | -2.30304200 | -0.11472300 |
| H    | 0.28596200  | -3.23783800 | -0.74460400 |
| H    | 0.16977700  | -2.91944100 | 1.00092900  |
| H    | -1.07033500 | -0.18354200 | -0.11594000 |
| H    | 0.16967000  | 0.43341600  | 0.99970900  |
| H    | 0.28648400  | 0.75060600  | -0.74601500 |

**Table S-5.** Geometric coordinates and thermally corrected MP2 energies for ortho [A(THF)<sub>2</sub>(*N,N*-dimethylaniline)]<sup>‡</sup>.

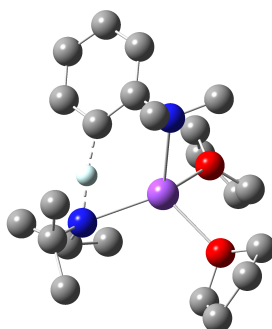

G = -1284.681788 Hartree

G<sub>MP2</sub> = -1280.394604 Hartree

| Atom | X           | Y           | Z           | Atom | X           | Y           | Z           |
|------|-------------|-------------|-------------|------|-------------|-------------|-------------|
| H    | -3.53894500 | -4.59032100 | 0.27759100  | N    | -1.85811700 | -3.29561600 | -2.84313000 |
| C    | 0.00000000  | 0.00000000  | 0.00000000  | C    | -3.07333200 | -2.84779400 | -2.14241000 |
| N    | -0.61472500 | -1.27376400 | 0.38936200  | C    | -4.33284300 | -3.24121300 | -2.62240800 |
| Na   | -0.63280500 | -3.40404000 | -0.70873500 | C    | -5.49482000 | -2.81022400 | -1.97999400 |
| O    | 1.49151200  | -4.44814600 | -0.80867000 | C    | -5.39097600 | -1.97082400 | -0.87164500 |
| C    | 2.09063100  | -5.11921100 | -1.92455700 | C    | -4.12367400 | -1.59247400 | -0.41557900 |
| H    | 1.30249000  | -5.31866900 | -2.65499700 | C    | -2.92006400 | -2.01637700 | -1.00920400 |
| H    | 2.52062500  | -6.07838200 | -1.59568800 | H    | -4.07436700 | -0.93170900 | 0.45100300  |
| C    | 3.17847900  | -4.15656400 | -2.40607800 | H    | -6.28924100 | -1.61673900 | -0.36813800 |
| H    | 3.96924200  | -4.66264000 | -2.96779200 | H    | -6.46831200 | -3.12096700 | -2.35322900 |
| H    | 2.73660500  | -3.39365600 | -3.05542200 | H    | -4.42378000 | -3.87943000 | -3.49817300 |
| C    | 3.68450600  | -3.52206500 | -1.08622300 | C    | -1.94212100 | -4.62595900 | -3.45103700 |
| H    | 3.83412100  | -2.44416800 | -1.19161300 | H    | -2.61865400 | -4.67681200 | -4.32158100 |
| H    | 4.63726000  | -3.95859600 | -0.77130300 | H    | -0.94404600 | -4.91605100 | -3.80447100 |
| C    | 2.56941600  | -3.84512500 | -0.06142500 | H    | -2.27088100 | -5.35275900 | -2.70427900 |
| H    | 2.91916700  | -4.55714600 | 0.69885700  | C    | -1.44049900 | -2.31410400 | -3.85505600 |
| H    | 2.15643900  | -2.96472900 | 0.43513000  | H    | -1.39257000 | -1.32349100 | -3.40474800 |
| O    | -1.70531200 | -5.44244700 | -0.06415100 | H    | -0.44692300 | -2.57719200 | -4.24121400 |
| C    | -1.04887900 | -6.63101000 | 0.39141400  | H    | -2.14259300 | -2.27616200 | -4.70698300 |
| H    | 0.02179700  | -6.41795600 | 0.42257000  | C    | -0.76547300 | -1.37250800 | 1.84936900  |
| H    | -1.22889600 | -7.44594600 | -0.32733800 | C    | -1.91850700 | -0.53037100 | 2.44343900  |
| C    | -1.67933200 | -6.95528100 | 1.76030100  | H    | -1.86349200 | -0.50102400 | 3.54021900  |
| H    | -1.78394300 | -8.03483600 | 1.90512100  | H    | -2.89083800 | -0.95288700 | 2.16724200  |
| H    | -1.05971900 | -6.57098000 | 2.57582000  | H    | -1.88713000 | 0.50374100  | 2.08397200  |
| C    | -3.04993900 | -6.22228600 | 1.71787100  | C    | -0.93704300 | -2.83580000 | 2.28364700  |
| H    | -3.09849600 | -5.45285800 | 2.49343300  | H    | -1.04661900 | -2.91890900 | 3.37260000  |
| H    | -3.89473200 | -6.90067400 | 1.86969400  | H    | -0.06977800 | -3.44171400 | 1.98866600  |
| C    | -3.08532900 | -5.58170900 | 0.31863500  | H    | -1.83466000 | -3.27318400 | 1.82994000  |
| H    | -3.59574500 | -6.23441200 | -0.40525400 |      |             |             |             |

H 0.15947400 -1.01272000 2.33343000  
C 1.52661600 0.02863100 0.22993000  
H 1.94313000 1.02453100 0.02548900  
H 2.02059600 -0.68862800 -0.44011600  
H 1.79118500 -0.23345900 1.26059200  
C -0.28660400 0.33366600 -1.46850200  
H 0.14578000 1.30564300 -1.73595100  
H -1.36194900 0.36463600 -1.66787900  
H 0.16198800 -0.42098400 -2.12792900  
H -0.41876400 0.83530600 0.59460400  
H -1.72571900 -1.54188900 -0.28941800

**Table S-6.** Geometric coordinates and thermally corrected MP2 energies for meta [A(THF)<sub>2</sub>(*N,N*-dimethylaniline)]<sup>‡</sup>.

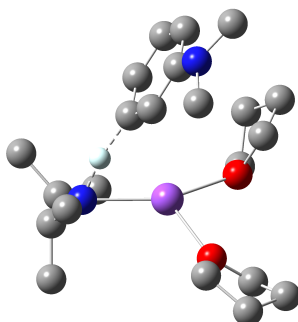

G = -1284.713867 Hartree

G<sub>MP2</sub> = -1280.420192 Hartree

| Atom | X           | Y           | Z          | Atom | X          | Y           | Z           |
|------|-------------|-------------|------------|------|------------|-------------|-------------|
| H    | 4.64168300  | 2.10351400  | 3.03076100 | H    | 4.64168300 | 2.10351400  | 3.03076100  |
| C    | 0.00000000  | 0.00000000  | 0.00000000 | C    | 3.48818400 | 0.01669200  | 1.22386000  |
| N    | 0.71523500  | -0.12254100 | 1.27107600 | C    | 4.19578300 | 0.91177100  | 0.39921500  |
| Na   | 1.81785200  | 1.67560100  | 2.32039000 | C    | 5.60913200 | 1.04279200  | 0.39922200  |
| O    | 1.21731500  | 3.89655000  | 1.97848600 | C    | 6.33318500 | 0.25181000  | 1.31721500  |
| C    | 1.03752700  | 4.80970200  | 3.07880400 | C    | 5.66053400 | -0.64852400 | 2.14561500  |
| H    | 1.69309700  | 4.47585800  | 3.88621600 | C    | 4.26915500 | -0.76392500 | 2.10109100  |
| H    | -0.00617000 | 4.76857800  | 3.42529100 | H    | 3.78964400 | -1.49177700 | 2.75976200  |
| C    | 1.37114500  | 6.18416000  | 2.50526300 | H    | 6.24588500 | -1.26508900 | 2.82844000  |
| H    | 0.93828200  | 7.00326600  | 3.08733800 | H    | 7.41410300 | 0.31327100  | 1.37466900  |
| H    | 2.45774700  | 6.32548800  | 2.46655600 | N    | 6.27139300 | 1.90499600  | -0.48915900 |
| C    | 0.78562000  | 6.07272500  | 1.08771200 | C    | 7.66526300 | 2.22446100  | -0.23968600 |
| H    | 1.24437100  | 6.76325500  | 0.37421200 | H    | 8.02630000 | 2.89311700  | -1.02513200 |
| H    | -0.29096200 | 6.27658400  | 1.10716300 | H    | 7.83414100 | 2.71450300  | 0.73592600  |
| C    | 1.04851800  | 4.60127700  | 0.72515800 | H    | 8.28399600 | 1.32065000  | -0.27035500 |
| H    | 0.22389300  | 4.14491400  | 0.16793700 | C    | 5.49486800 | 2.89779400  | -1.20687100 |
| H    | 1.97068000  | 4.47674900  | 0.14542800 | H    | 6.15907900 | 3.46337300  | -1.86536500 |
| O    | 3.00085200  | 2.27328200  | 4.28180700 | H    | 4.73598600 | 2.42072100  | -1.83569200 |
| C    | 2.90262000  | 1.59399400  | 5.54946900 | H    | 4.97773400 | 3.61425100  | -0.54122000 |
| H    | 2.04741500  | 0.91462400  | 5.49779300 | H    | 3.62845800 | 1.51804400  | -0.30599000 |
| H    | 2.72230400  | 2.32930300  | 6.34828500 | C    | 0.22581400 | -1.23692400 | 2.09166100  |
| C    | 4.24721900  | 0.89479500  | 5.72694200 | C    | 0.74660100 | -2.61656400 | 1.62938500  |
| H    | 4.45965500  | 0.64237400  | 6.77033400 | H    | 0.29635500 | -3.43283800 | 2.21036900  |
| H    | 4.27184900  | -0.02138100 | 5.12794000 | H    | 1.83563100 | -2.67596100 | 1.73928300  |
| C    | 5.21642600  | 1.93564200  | 5.14214700 | H    | 0.51073200 | -2.79265100 | 0.57401800  |
| H    | 6.14685900  | 1.49219100  | 4.77862800 | C    | 0.58475100 | -1.00979000 | 3.56905000  |
| H    | 5.46741400  | 2.69033700  | 5.89672300 | H    | 0.24658300 | -1.84122100 | 4.20054600  |
| C    | 4.40151100  | 2.55664900  | 3.99662500 | H    | 0.11412100 | -0.09012400 | 3.94380500  |
| H    | 4.52872200  | 3.64342800  | 3.92847600 | H    | 1.67233200 | -0.92385000 | 3.69517200  |

H -0.87648600 -1.27561400 2.04189500  
C -1.35722400 0.71562200 0.15959900  
H -1.98580400 0.22193200 0.90928800  
H -1.91873600 0.73538000 -0.78483500  
H -1.19945800 1.75193800 0.48959000  
C 0.85675800 0.74028000 -1.03708100  
H 0.31662000 0.84788800 -1.98575900  
H 1.79476900 0.21125700 -1.22841900  
H 1.10699700 1.75168500 -0.68453300  
H -0.21580700 -0.99719100 -0.43101200  
H 2.00997100 -0.16619700 1.15001300

**Table S-7.** Geometric coordinates and thermally corrected MP2 energies for para [A(THF)<sub>2</sub>(*N,N*-dimethylaniline)]<sup>‡</sup>.

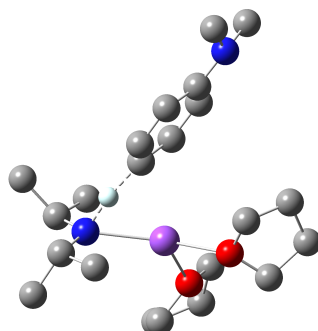

G = -1284.71471 Hartree

G<sub>MP2</sub> = -1280.420866 Hartree

| Atom | X           | Y          | Z           | Atom | X           | Y           | Z           |
|------|-------------|------------|-------------|------|-------------|-------------|-------------|
| H    | -3.60054700 | 3.68161500 | 0.04285600  | H    | -3.60054700 | 3.68161500  | 0.04285600  |
| C    | 0.00000000  | 0.00000000 | 0.00000000  | C    | -2.83346200 | 1.44240600  | -1.68487100 |
| N    | -0.18750100 | 0.67695000 | -1.28653600 | C    | -3.24733700 | 2.22909100  | -2.77867900 |
| Na   | -0.79467600 | 2.95336600 | -1.17122100 | C    | -4.57511700 | 2.59850900  | -3.03164500 |
| O    | 0.89246500  | 4.33612000 | -2.07741400 | C    | -5.61053500 | 2.18205600  | -2.17038600 |
| C    | 2.23076400  | 3.90817000 | -1.71589500 | C    | -5.23725800 | 1.37111100  | -1.07551800 |
| H    | 2.16512000  | 2.88073900 | -1.34513800 | C    | -3.89881000 | 1.03510700  | -0.85604500 |
| H    | 2.59795800  | 4.55946100 | -0.91151200 | H    | -3.69099000 | 0.40265400  | 0.01088800  |
| C    | 3.07055100  | 4.05167800 | -2.98600000 | H    | -5.99214700 | 0.99252900  | -0.39353200 |
| H    | 4.12761000  | 4.23069000 | -2.76864400 | N    | -6.94718700 | 2.56626400  | -2.38100700 |
| H    | 2.99593800  | 3.14468100 | -3.59629200 | C    | -7.98818800 | 1.84002900  | -1.67349700 |
| C    | 2.38633300  | 5.23222400 | -3.69333600 | H    | -8.96038400 | 2.26352300  | -1.93880100 |
| H    | 2.57742400  | 5.26295700 | -4.76997600 | H    | -8.00503500 | 0.76074400  | -1.90457400 |
| H    | 2.71822600  | 6.18345900 | -3.26076500 | H    | -7.86976300 | 1.94884900  | -0.58996500 |
| C    | 0.91116000  | 4.98204600 | -3.37069500 | C    | -7.30963400 | 3.09040700  | -3.68634300 |
| H    | 0.31524400  | 5.89821300 | -3.30529900 | H    | -8.37344000 | 3.34182400  | -3.68677600 |
| H    | 0.44703300  | 4.31290100 | -4.10717100 | H    | -6.75698100 | 4.01155900  | -3.90282600 |
| O    | -1.79579600 | 4.66428100 | 0.01632900  | H    | -7.12014300 | 2.38202400  | -4.51168500 |
| C    | -1.39944000 | 6.04250000 | -0.00586000 | H    | -4.79776300 | 3.19508000  | -3.91110800 |
| H    | -0.46055200 | 6.09917600 | -0.56113000 | H    | -2.50796900 | 2.57181100  | -3.51259100 |
| H    | -1.22421000 | 6.38505300 | 1.02492200  | C    | 0.30883500  | -0.06758500 | -2.45043100 |
| C    | -2.57656100 | 6.80731900 | -0.65182600 | C    | -0.40506800 | -1.41699200 | -2.68804900 |
| H    | -2.76663000 | 7.74995400 | -0.12940700 | H    | -0.00577400 | -1.92519300 | -3.57566300 |
| H    | -2.36566600 | 7.04958700 | -1.69803000 | H    | -1.47981400 | -1.25816300 | -2.83553500 |
| C    | -3.76926500 | 5.81681900 | -0.54039700 | H    | -0.28092700 | -2.09737400 | -1.83820500 |
| H    | -4.05792300 | 5.44000200 | -1.52540500 | C    | 0.18390900  | 0.80680700  | -3.70748600 |
| H    | -4.65310900 | 6.26854300 | -0.08054100 | H    | 0.60325300  | 0.29999200  | -4.58562100 |
| C    | -3.20745600 | 4.66522000 | 0.30442300  | H    | 0.72140900  | 1.75444000  | -3.57299900 |
| H    | -3.35118400 | 4.84520600 | 1.38068600  | H    | -0.86608300 | 1.03468700  | -3.92339700 |



H 1.38433000 -0.28653400 -2.33068600  
C 1.46898500 -0.33315200 0.32312400  
H 1.55737600 -0.77361100 1.32472500  
H 2.07973700 0.58018200 0.29520500  
H 1.90029600 -1.04667000 -0.38668100  
C -0.57228900 0.87865700 1.12444900  
H -0.53370600 0.35912400 2.08968900  
H -1.61590600 1.14880600 0.93134000  
H 0.01357000 1.80512900 1.23033700  
H -0.55618900 -0.95807500 0.04067800  
H -1.45176800 0.93042800 -1.47528900

**Table S-8.** Geometric coordinates and thermally corrected MP2 energies for ortho [A(THF)<sub>3</sub>(*N,N*-dimethylaniline)]<sup>‡</sup>.

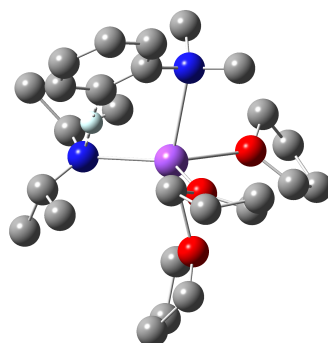

G = -1517.061097 Hartree  
G<sub>MP2</sub> = -1512.009277 Hartree

| Atom | X           | Y           | Z           | Atom | X           | Y           | Z           |
|------|-------------|-------------|-------------|------|-------------|-------------|-------------|
| Na   | 0.00000000  | 0.00000000  | 0.00000000  | H    | 4.72246400  | -1.60932900 | 1.32543900  |
| N    | -0.48006300 | 2.41085300  | -0.11371100 | C    | 3.47117700  | -0.99022400 | 3.02539200  |
| C    | -0.75740500 | 3.12662500  | -1.36846300 | H    | 3.86765600  | 0.00792900  | 2.81293200  |
| C    | 0.37938300  | 4.05043600  | -1.85307800 | H    | 3.81857800  | -1.28491200 | 4.02015600  |
| H    | 0.13016500  | 4.48101000  | -2.83172600 | C    | 1.94285800  | -0.97472200 | 2.91821000  |
| H    | 1.31668700  | 3.48782400  | -1.95653500 | H    | 1.49604300  | -1.80190300 | 3.49337200  |
| H    | 0.56584200  | 4.88674700  | -1.17183100 | H    | 1.47807900  | -0.03697000 | 3.22631500  |
| C    | -1.07529400 | 2.11213800  | -2.47674900 | O    | -0.69772000 | -1.73777500 | -1.63966200 |
| H    | -1.35054200 | 2.62187500  | -3.40914600 | C    | -0.12638900 | -3.04699900 | -1.78816400 |
| H    | -1.90537400 | 1.46315300  | -2.18699200 | H    | 0.28252500  | -3.35027700 | -0.81939500 |
| H    | -0.19845200 | 1.48250600  | -2.68034600 | H    | 0.69726300  | -3.01207900 | -2.51722400 |
| H    | -1.65298700 | 3.77488000  | -1.27295400 | C    | -1.26369100 | -3.93935200 | -2.28636200 |
| C    | -0.16055300 | 3.30736100  | 1.00801600  | H    | -0.90334000 | -4.82688800 | -2.81577400 |
| C    | -1.37403600 | 4.10038700  | 1.54616300  | H    | -1.88423800 | -4.27077500 | -1.44534100 |
| H    | -1.08105900 | 4.77568700  | 2.36145200  | C    | -2.04636500 | -2.96741100 | -3.18272600 |
| H    | -2.14814000 | 3.42098600  | 1.92005400  | H    | -3.09108800 | -3.25819600 | -3.32565400 |
| H    | -1.82776900 | 4.71359200  | 0.75929500  | H    | -1.57643800 | -2.90366400 | -4.17153400 |
| C    | 0.49963700  | 2.51233900  | 2.14339900  | C    | -1.91487000 | -1.63726000 | -2.42896000 |
| H    | 0.75904500  | 3.16298200  | 2.98891300  | H    | -1.82409100 | -0.77517900 | -3.09585000 |
| H    | 1.41967000  | 2.03134300  | 1.78721900  | H    | -2.74646700 | -1.46041500 | -1.74121800 |
| H    | -0.17020100 | 1.73186400  | 2.51951200  | O    | 2.13325700  | -0.09262400 | -1.40209600 |
| H    | 0.59046900  | 4.05101500  | 0.69478100  | C    | 2.22422500  | -0.33451100 | -2.81797000 |
| O    | 1.68092800  | -1.15302800 | 1.52238000  | H    | 1.21190200  | -0.50786600 | -3.19168800 |
| C    | 2.60272900  | -2.15329500 | 1.06358300  | H    | 2.82447900  | -1.24063800 | -2.99391800 |
| H    | 2.74825800  | -1.97708500 | -0.00274100 | C    | 2.90693100  | 0.89868600  | -3.41060100 |
| H    | 2.16067400  | -3.15082500 | 1.20953200  | H    | 3.41923900  | 0.68364600  | -4.35358100 |
| C    | 3.88617700  | -1.99202900 | 1.91776700  | H    | 2.17170200  | 1.69026200  | -3.59113500 |
| H    | 4.19725400  | -2.95348500 | 2.33807000  | C    | 3.86256000  | 1.30195300  | -2.27652400 |
|      |             |             |             | H    | 4.15291700  | 2.35622800  | -2.31182400 |

H 4.77703600 0.69779700 -2.31628500  
C 3.04430500 0.96647800 -1.02308500  
H 3.66114000 0.61208000 -0.18989300  
H 2.44178100 1.81460400 -0.68006700  
N -1.83349600 -0.89298400 1.67035800  
C -2.95507300 -0.36036100 0.89119700  
C -4.14079000 -1.10231100 0.76241800  
C -5.21944300 -0.57314600 0.04848300  
C -5.11240300 0.70090500 -0.50906700  
C -3.91674900 1.41444600 -0.36411500  
C -2.79183300 0.91820400 0.32152700  
H -3.85618500 2.40261000 -0.82507000  
H -5.95126100 1.12886300 -1.05627200  
H -6.13681000 -1.14929100 -0.05443500  
H -4.24045000 -2.08627700 1.21573600  
C -1.71625000 -2.34974900 1.69641100  
H -0.74317000 -2.61681800 2.12568900  
H -2.49646500 -2.85073000 2.29777000  
H -1.76346100 -2.73555200 0.67511200  
C -1.87582400 -0.37535300 3.04378400  
H -0.94920300 -0.63025300 3.57217400  
H -1.98690200 0.70937100 3.01907700  
H -2.72475400 -0.79418400 3.61483600  
H -1.56578700 1.73563300 0.18551400

**Table S-9.** Geometric coordinates and thermally corrected MP2 energies for meta [A(THF)<sub>3</sub>(*N,N*-dimethylaniline)]<sup>‡</sup>.

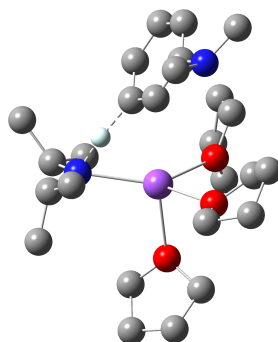

G = -1517.068011 Hartree  
G<sub>MP2</sub> = -1512.008325 Hartree

| Atom | X           | Y           | Z           | Atom | X           | Y           | Z           |
|------|-------------|-------------|-------------|------|-------------|-------------|-------------|
| Na   | 0.00000000  | 0.00000000  | 0.00000000  | C    | 0.80433200  | -2.58316200 | 3.46426300  |
| N    | -0.37279300 | -1.29636500 | -2.00537400 | H    | 0.97587200  | -3.40245500 | 2.76075800  |
| C    | -0.46443500 | -0.71647700 | -3.34692100 | H    | 1.27623800  | -2.85509500 | 4.41328000  |
| C    | -1.83618600 | -0.06494700 | -3.62152900 | C    | 1.37961100  | -1.26710200 | 2.90635700  |
| H    | -1.91279400 | 0.29238000  | -4.65779700 | H    | 1.78921100  | -0.64040700 | 3.71379600  |
| H    | -1.98268300 | 0.79363600  | -2.95186000 | H    | 2.13560200  | -1.40706900 | 2.13255700  |
| H    | -2.66027100 | -0.76835000 | -3.45477400 | O    | 0.98684000  | 2.19665500  | 0.36235200  |
| C    | 0.64224600  | 0.32470500  | -3.56473100 | C    | 1.99484500  | 2.24130500  | 1.40514300  |
| H    | 0.56495700  | 0.77520800  | -4.56204400 | H    | 2.40033500  | 1.23550200  | 1.53381400  |
| H    | 1.63424000  | -0.12312100 | -3.46062500 | H    | 1.50670700  | 2.55360400  | 2.33763600  |
| H    | 0.55662900  | 1.13630300  | -2.82781700 | C    | 3.04635200  | 3.25087800  | 0.93734000  |
| H    | -0.32177600 | -1.48760100 | -4.12870700 | H    | 3.53434600  | 3.75818200  | 1.77555000  |
| C    | -1.04531400 | -2.59892800 | -1.90511400 | H    | 3.81518300  | 2.73861100  | 0.34795300  |
| C    | -0.28120800 | -3.75593000 | -2.59015400 | C    | 2.21958200  | 4.19969100  | 0.05569900  |
| H    | -0.85882100 | -4.68969100 | -2.55714800 | H    | 2.82173000  | 4.75157700  | -0.67244700 |
| H    | 0.68169200  | -3.93019100 | -2.09684600 | H    | 1.67618200  | 4.92762200  | 0.67066600  |
| H    | -0.07733000 | -3.53335400 | -3.64308900 | C    | 1.24445400  | 3.22937300  | -0.61203500 |
| C    | -1.30034000 | -2.95259800 | -0.43092500 | H    | 0.28646500  | 3.68365400  | -0.88640600 |
| H    | -1.78266100 | -3.93367800 | -0.33282300 | H    | 1.68557900  | 2.77655200  | -1.50938700 |
| H    | -1.95153400 | -2.20764700 | 0.04387900  | O    | -2.16375300 | 0.91379900  | 0.56551000  |
| H    | -0.35764800 | -2.98863900 | 0.12899600  | C    | -2.34642300 | 2.23893500  | 1.07858800  |
| H    | -2.03727800 | -2.54445100 | -2.38979500 | H    | -1.35276100 | 2.65074200  | 1.26431600  |
| O    | 0.26287300  | -0.58703500 | 2.30853400  | H    | -2.90994900 | 2.20024200  | 2.02493900  |
| C    | -0.84539400 | -0.82043600 | 3.18616300  | C    | -3.14377800 | 2.96119400  | -0.01118600 |
| H    | -1.75349000 | -0.58042000 | 2.63079000  | H    | -3.70675700 | 3.81584200  | 0.37642400  |
| H    | -0.76978400 | -0.14774300 | 4.05567800  | H    | -2.46300300 | 3.32923200  | -0.78623700 |
| C    | -0.71553400 | -2.29251600 | 3.61550400  | C    | -4.05465400 | 1.84262300  | -0.57506800 |
| H    | -1.07760800 | -2.44955000 | 4.63623800  | H    | -4.10242800 | 1.87624700  | -1.66692000 |

H -5.07801600 1.93139400 -0.19713600  
C -3.39670100 0.53345700 -0.07323200  
H -4.03885200 0.02086200 0.65737300  
H -3.13611400 -0.16433400 -0.87044200  
C 3.10770600 -0.37251800 -1.00141600  
C 4.43190000 -0.44098400 -0.51594500  
C 4.84313500 -1.62097100 0.12000200  
C 3.94534200 -2.68862400 0.24084800  
C 2.64870900 -2.58737900 -0.26446500  
C 2.17631000 -1.41886000 -0.90484800  
H 1.98777400 -3.45030200 -0.15405900  
H 4.28081100 -3.60532900 0.72615500  
H 5.85421000 -1.72855000 0.49929500  
N 5.29178500 0.69649600 -0.66083600  
C 6.53456500 0.67285700 0.09410100  
H 7.26533200 -0.07057900 -0.27593200  
H 7.00574200 1.66026100 0.03151600  
H 6.32954600 0.45650000 1.14663400  
C 5.52218800 1.12066400 -2.04272100  
H 4.57889000 1.17634200 -2.58743300  
H 5.98199000 2.11604900 -2.04651500  
H 6.19127200 0.43053100 -2.58877400  
H 2.80583000 0.56588500 -1.47236800  
H 0.85076500 -1.39560100 -1.56811700

**Table S-10.** Geometric coordinates and thermally corrected MP2 energies for para [A(THF)<sub>3</sub>(*N,N*-dimethylaniline)]<sup>‡</sup>.

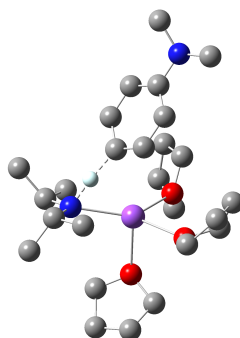

G = -1517.065405 Hartree

G<sub>MP2</sub> = -1512.006045 Hartree

| Atom | X           | Y           | Z           |   | X           | Y           | Z           |
|------|-------------|-------------|-------------|---|-------------|-------------|-------------|
| Na   | 0.00000000  | 0.00000000  | 0.00000000  | H | -0.23901700 | 1.25395800  | 4.10462300  |
| N    | 0.30317600  | 2.18353400  | -1.01385600 | C | -2.22548300 | 0.43999500  | 3.65024300  |
| C    | 0.61274300  | 2.39443100  | -2.43117800 | H | -2.40797900 | 1.45045600  | 3.27524300  |
| C    | 2.06732100  | 2.82002400  | -2.70855900 | H | -2.98517800 | 0.22253700  | 4.40700900  |
| H    | 2.24038800  | 2.92631100  | -3.78737100 | C | -2.27799400 | -0.57071300 | 2.49168200  |
| H    | 2.76720700  | 2.06436500  | -2.32587100 | H | -2.68116400 | -1.53914800 | 2.82620000  |
| H    | 2.31932100  | 3.77844100  | -2.24251300 | H | -2.83464900 | -0.22239900 | 1.62143100  |
| C    | 0.31141000  | 1.10689100  | -3.21076300 | O | -0.14072600 | -2.28879100 | -0.91080600 |
| H    | 0.47404700  | 1.24833700  | -4.28661600 | C | -0.82843300 | -3.27889200 | -0.12756200 |
| H    | -0.72702800 | 0.79546500  | -3.06395700 | H | -1.00485900 | -2.84241800 | 0.85632700  |
| H    | 0.97473500  | 0.29601600  | -2.87489000 | H | -0.19256800 | -4.17328600 | -0.02344000 |
| H    | -0.03251200 | 3.18001400  | -2.87295100 | C | -2.09040900 | -3.58524100 | -0.93538900 |
| C    | 0.54824500  | 3.35500400  | -0.16155000 | H | -2.51405500 | -4.56592100 | -0.69800900 |
| C    | -0.26387200 | 4.61451900  | -0.53980300 | H | -2.84729900 | -2.82141600 | -0.73374700 |
| H    | -0.03676400 | 5.44731100  | 0.13886100  | C | -1.59376800 | -3.48106200 | -2.39891600 |
| H    | -1.34023100 | 4.41296900  | -0.48819300 | H | -2.31483800 | -2.95457700 | -3.03000900 |
| H    | -0.03848100 | 4.95154200  | -1.55743900 | H | -1.42865200 | -4.46930900 | -2.83969900 |
| C    | 0.28014800  | 2.98864900  | 1.30740300  | C | -0.25750100 | -2.70528000 | -2.28438500 |
| H    | 0.48297100  | 3.84039200  | 1.96867100  | H | 0.59755600  | -3.34764400 | -2.53939600 |
| H    | 0.92177100  | 2.15783600  | 1.62766200  | H | -0.21429400 | -1.80552300 | -2.90078900 |
| H    | -0.76321200 | 2.68914500  | 1.45657900  | O | 2.26012600  | -0.50090800 | 0.76663500  |
| H    | 1.61441800  | 3.64258200  | -0.21274300 | C | 2.90931200  | -1.74957500 | 0.48330900  |
| O    | -0.90656900 | -0.75280900 | 2.08898200  | H | 2.13932100  | -2.43927400 | 0.13261000  |
| C    | -0.14307500 | -0.77216200 | 3.30367600  | H | 3.37189100  | -2.15092900 | 1.39901200  |
| H    | 0.89881100  | -0.59082100 | 3.03266300  | C | 3.96638300  | -1.40373700 | -0.56298400 |
| H    | -0.22462300 | -1.76821600 | 3.76699100  | H | 4.76222800  | -2.15209300 | -0.63065000 |
| C    | -0.77731000 | 0.30670800  | 4.20118000  | H | 3.49587500  | -1.31138900 | -1.54854200 |
| H    | -0.75177700 | 0.01528500  | 5.25572500  | C | 4.46570400  | -0.03317600 | -0.06794100 |
|      |             |             |             | H | 4.82742600  | 0.60241000  | -0.88143000 |

H 5.28851100 -0.16162900 0.64407200  
C 3.22790200 0.57042900 0.63093300  
H 3.47001800 0.96299400 1.62651900  
H 2.74079900 1.35386700 0.04558200  
C -2.92297400 0.22142300 -1.36740700  
C -4.28034300 -0.12283000 -1.25381100  
C -5.14107700 0.63521600 -0.44428600  
C -4.58009200 1.73956300 0.22793400  
C -3.22935900 2.05484800 0.08061900  
C -2.32526100 1.31461600 -0.71447200  
H -2.87042200 2.93138600 0.62584700  
H -5.20638400 2.34184300 0.88319300  
N -6.51247800 0.30886300 -0.25733100  
C -7.47446500 1.38612900 -0.46808800  
H -7.63268100 1.61107800 -1.53921800  
H -8.43984600 1.10145200 -0.03358400  
H -7.14258500 2.30232800 0.02154800  
C -6.97579700 -0.94714200 -0.81614400  
H -6.32671900 -1.76573100 -0.49061800  
H -7.98726100 -1.14658000 -0.44514900  
H -7.01567800 -0.95734900 -1.92214900  
H -4.66428100 -0.96803100 -1.81919800  
H -2.32039000 -0.41062100 -2.02680100  
H -0.94465300 1.82957700 -0.91221300

**Table S-11.** Geometric coordinates and thermally corrected MP2 energies for anisole.

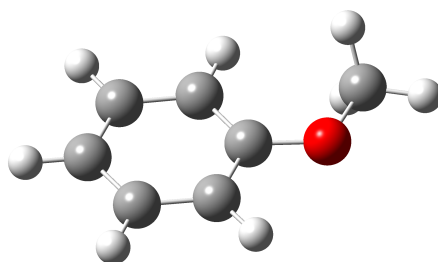

$G = -346.656107$  Hartree

$G_{\text{MP2}} = -345.5302965$  Hartree

| Atom | X           | Y           | Z           |
|------|-------------|-------------|-------------|
| C    | 0.00000000  | 0.00000000  | 0.00000000  |
| O    | 1.00742000  | -0.99726700 | -0.00026100 |
| C    | 2.31417500  | -0.59621800 | -0.00015800 |
| C    | 3.26420100  | -1.62867200 | -0.00011700 |
| C    | 4.62082000  | -1.32550500 | -0.00008000 |
| C    | 5.05242100  | 0.00576300  | -0.00007900 |
| C    | 4.10508600  | 1.02657500  | -0.00013800 |
| C    | 2.73608600  | 0.73838800  | -0.00018200 |
| H    | 2.01850900  | 1.55108900  | -0.00025300 |
| H    | 4.42444200  | 2.06569300  | -0.00015400 |
| H    | 6.11298900  | 0.23985600  | -0.00004300 |
| H    | 5.34726400  | -2.13406300 | -0.00004000 |
| H    | 2.91175700  | -2.65555100 | -0.00011100 |
| H    | 0.05775100  | 0.63475600  | -0.89449000 |
| H    | -0.95169700 | -0.53489100 | 0.00018600  |
| H    | 0.05816200  | 0.63468100  | 0.89451300  |



**Table S-12.** Geometric coordinates and thermally corrected MP2 energies for [A(THF)<sub>2</sub>(anisole)]<sup>‡</sup>.

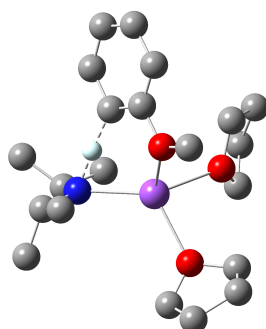

G = -1265.304445 Hartree  
G<sub>MP2</sub> = -1261.132571 Hartree

| Atom | X           | Y          | Z           | Atom | X           | Y           | Z           |
|------|-------------|------------|-------------|------|-------------|-------------|-------------|
| C    | 0.00000000  | 0.00000000 | 0.00000000  | H    | -0.23446300 | 3.93529700  | -4.02848500 |
| N    | 0.22119900  | 1.24558300 | 0.73839300  | H    | -1.72291400 | 4.18605100  | -3.07412800 |
| Na   | -0.89865300 | 3.22579900 | 0.16981100  | H    | -0.47973000 | 5.46544500  | -3.14015800 |
| O    | -3.24074000 | 3.32202000 | 0.11767200  | C    | 0.73290300  | 1.05949400  | 2.10037700  |
| C    | -3.99697000 | 4.50320500 | -0.17682600 | C    | 2.09186700  | 0.32919500  | 2.19593200  |
| H    | -3.28472100 | 5.30553600 | -0.37898000 | H    | 2.40387200  | 0.21469900  | 3.24247600  |
| H    | -4.60201600 | 4.77830200 | 0.70111700  | H    | 2.87448200  | 0.88560700  | 1.66611000  |
| C    | -4.89173300 | 4.11188100 | -1.36370100 | H    | 2.04406300  | -0.67336100 | 1.75771700  |
| H    | -5.83781000 | 4.66119200 | -1.35998400 | C    | 0.83456400  | 2.42664900  | 2.79530800  |
| H    | -4.38614300 | 4.32840800 | -2.31002100 | H    | 1.21900400  | 2.32580700  | 3.81789200  |
| C    | -5.08274100 | 2.57924700 | -1.18374200 | H    | -0.15356600 | 2.90304300  | 2.85871600  |
| H    | -4.77864400 | 2.04001500 | -2.08530200 | H    | 1.50629000  | 3.09625700  | 2.24455100  |
| H    | -6.12248100 | 2.31157400 | -0.97433100 | H    | 0.01894700  | 0.46259500  | 2.69616800  |
| C    | -4.16600100 | 2.22948200 | 0.00863700  | C    | -0.99465700 | -0.96218100 | 0.67966900  |
| H    | -4.74150300 | 2.14982300 | 0.94257500  | H    | -1.16960000 | -1.84778300 | 0.05479600  |
| H    | -3.58157200 | 1.31687300 | -0.12245300 | H    | -1.95857000 | -0.45970900 | 0.84250100  |
| O    | -0.09100500 | 3.78548500 | -1.95575400 | H    | -0.63711200 | -1.31494700 | 1.65292700  |
| C    | 1.31487700  | 3.76989400 | -1.81373700 | C    | -0.49427000 | 0.32066100  | -1.41892100 |
| C    | 2.13649100  | 4.50789300 | -2.67150200 | H    | -0.58845800 | -0.59560500 | -2.01515500 |
| C    | 3.51971900  | 4.48351200 | -2.45666700 | H    | 0.19158700  | 0.99786000  | -1.93505500 |
| C    | 4.04591400  | 3.73939600 | -1.40388800 | H    | -1.48481300 | 0.79933200  | -1.38846200 |
| C    | 3.17801300  | 3.01464300 | -0.57475300 | H    | 0.94367100  | -0.56782300 | -0.12853300 |
| C    | 1.78620700  | 2.99591600 | -0.74313900 | O    | -0.84684800 | 5.44812100  | 1.01811800  |
| H    | 3.61703300  | 2.42775600 | 0.23458100  | C    | -1.27264400 | 5.82136000  | 2.34096100  |
| H    | 5.12093800  | 3.71687800 | -1.23530500 | H    | -1.63856600 | 4.92058300  | 2.84241900  |
| H    | 4.17307900  | 5.04856300 | -3.11759600 | H    | -2.09852900 | 6.54594400  | 2.27436900  |
| H    | 1.73680100  | 5.09756500 | -3.49158200 | C    | -0.04169300 | 6.44293000  | 2.99612600  |
| C    | -0.64753800 | 4.37946500 | -3.11374400 | H    | -0.29274700 | 7.09387600  | 3.83911400  |
|      |             |            |             | H    | 0.62897600  | 5.65418500  | 3.35433000  |

|   |            |            |             |
|---|------------|------------|-------------|
| C | 0.58819100 | 7.19518200 | 1.81244700  |
| H | 1.66146700 | 7.36604100 | 1.93449000  |
| H | 0.10500100 | 8.17078600 | 1.68337900  |
| C | 0.28278700 | 6.27408500 | 0.62035400  |
| H | 0.01047500 | 6.82813100 | -0.28463500 |
| H | 1.11392900 | 5.60468300 | 0.38080800  |
| H | 1.02016500 | 2.05939100 | 0.03679700  |

**Table S-13.** Geometric coordinates and thermally corrected MP2 energies for [A(THF)<sub>3</sub>(anisole)]<sup>‡</sup>.

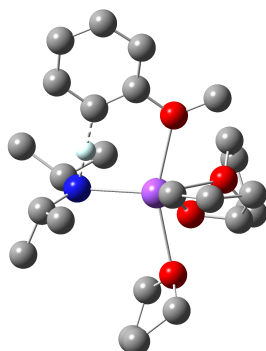

G = -1497.649036 Hartree  
G<sub>MP2</sub> = -1492.712932 Hartree

| Atom | X           | Y           | Z           | Atom | X           | Y           | Z           |
|------|-------------|-------------|-------------|------|-------------|-------------|-------------|
| Na   | 0.00000000  | 0.00000000  | 0.00000000  | H    | 3.14953900  | 0.16352300  | 3.23829400  |
| N    | -0.62823200 | 2.32616000  | -0.27544100 | C    | 1.31055700  | -0.44890500 | 4.26381400  |
| C    | -0.70079000 | 2.95874100  | -1.59887300 | H    | 1.17284700  | 0.62986900  | 4.37580600  |
| C    | 0.48586400  | 3.87953900  | -1.93811000 | H    | 1.26453000  | -0.89504600 | 5.26179700  |
| H    | 0.38072500  | 4.28712900  | -2.95214700 | C    | 0.23420400  | -1.04288700 | 3.33389600  |
| H    | 1.43222900  | 3.32527600  | -1.89203800 | H    | -0.06554900 | -2.04732200 | 3.67053100  |
| H    | 0.56283600  | 4.72929500  | -1.25117500 | H    | -0.65892000 | -0.42739000 | 3.22075300  |
| C    | -0.82996600 | 1.86102900  | -2.66490700 | O    | 0.02468700  | -1.79655600 | -1.65442600 |
| H    | -0.97111500 | 2.29237200  | -3.66427900 | C    | 0.56922500  | -3.09259100 | -1.33301600 |
| H    | -1.68832100 | 1.21802500  | -2.44557500 | H    | 0.73427200  | -3.13860100 | -0.25170400 |
| H    | 0.07578200  | 1.23779400  | -2.69042500 | H    | 1.54023100  | -3.20285600 | -1.83600100 |
| H    | -1.61055400 | 3.58474200  | -1.69302600 | C    | -0.44363900 | -4.12171300 | -1.84464600 |
| C    | -0.50382900 | 3.27046700  | 0.84469600  | H    | 0.02705300  | -5.07110800 | -2.11762500 |
| C    | -1.64028100 | 4.31313700  | 0.95027100  | H    | -1.20226400 | -4.32578800 | -1.08048800 |
| H    | -1.47800200 | 4.98163800  | 1.80606600  | C    | -1.07273900 | -3.38477800 | -3.03723600 |
| H    | -2.60915500 | 3.81797300  | 1.07994900  | H    | -2.06216200 | -3.76481100 | -3.30794200 |
| H    | -1.70083200 | 4.93993800  | 0.05370200  | H    | -0.42532300 | -3.46234300 | -3.91893700 |
| C    | -0.42138200 | 2.47295400  | 2.15500700  | C    | -1.12109000 | -1.94257300 | -2.52942300 |
| H    | -0.31599300 | 3.13874500  | 3.02098800  | H    | -1.03794500 | -1.19439000 | -3.32210600 |
| H    | 0.44170700  | 1.79449400  | 2.14498800  | H    | -2.03063400 | -1.74024100 | -1.95186100 |
| H    | -1.32960300 | 1.87435500  | 2.29440600  | O    | 2.47502500  | 0.11930400  | -0.53772300 |
| H    | 0.44033300  | 3.84068700  | 0.76134500  | C    | 3.04460500  | -0.29065300 | -1.79339900 |
| O    | 0.85311000  | -1.14344900 | 2.04187200  | H    | 2.25704300  | -0.79688100 | -2.35586500 |
| C    | 2.20325900  | -1.55534500 | 2.29043500  | H    | 3.86904100  | -0.99851600 | -1.61274000 |
| H    | 2.77345000  | -1.34059400 | 1.38600600  | C    | 3.55652900  | 0.99298700  | -2.44392200 |
| H    | 2.22378500  | -2.63905400 | 2.48958400  | H    | 4.33723900  | 0.80793600  | -3.18840900 |
| C    | 2.64644300  | -0.76250400 | 3.53307000  | H    | 2.73117600  | 1.52116900  | -2.93321700 |
| H    | 3.34361700  | -1.33550100 | 4.15192300  | C    | 4.05786300  | 1.78427500  | -1.22417900 |
|      |             |             |             | H    | 4.06058200  | 2.86581300  | -1.38821800 |

H 5.07977700 1.48090900 -0.96820800  
C 3.07347700 1.37032300 -0.11681200  
H 3.57133800 1.21805800 0.84865900  
H 2.25820400 2.08858700 0.01174800  
O -2.08047000 -1.02628400 0.77413800  
C -3.25760400 -0.30855800 0.45324300  
C -4.52108300 -0.89340600 0.59207600  
C -5.64916700 -0.13725500 0.24917700  
C -5.49572900 1.16529000 -0.21650600  
C -4.20543400 1.70354100 -0.33325100  
C -3.03980100 0.99524700 -0.00622700  
H -4.11185400 2.72953900 -0.69605100  
H -6.37024300 1.75608400 -0.48393500  
H -6.63854800 -0.57755400 0.35258200  
H -4.65808200 -1.90697500 0.95771500  
C -2.22134900 -2.35119900 1.24824900  
H -2.71968100 -2.99758600 0.51138200  
H -1.21029000 -2.71975100 1.43254800  
H -2.79614900 -2.38893800 2.18416300  
H -1.75084000 1.69377200 -0.12854800

**Table S-14.** Geometric coordinates and thermally corrected MP2 energies for benzotrifluoride.

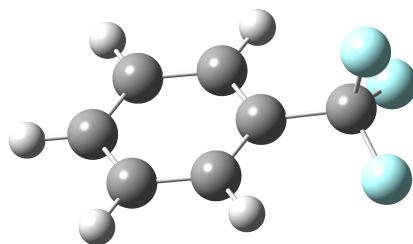

$G = -569.208662$  Hartree

$G_{\text{MP2}} = -567.6372619$  Hartree

| Atom | X           | Y           | Z           |
|------|-------------|-------------|-------------|
| C    | 0.00000000  | 0.00000000  | 0.00000000  |
| C    | -1.50426100 | 0.00038700  | -0.03310000 |
| C    | -2.20040600 | 1.21208400  | -0.02091300 |
| C    | -3.59453900 | 1.20884800  | 0.00408400  |
| C    | -4.29185900 | -0.00074400 | 0.01754000  |
| C    | -3.59353900 | -1.20988900 | 0.00410600  |
| C    | -2.19952800 | -1.21198800 | -0.02098000 |
| H    | -1.65143000 | -2.14836500 | -0.03876200 |
| H    | -4.13387700 | -2.15226700 | 0.00980200  |
| H    | -5.37829600 | -0.00119900 | 0.03568900  |
| H    | -4.13556200 | 2.15083300  | 0.00974500  |
| H    | -1.65302100 | 2.14881900  | -0.03854100 |
| F    | 0.51822500  | -1.08409000 | -0.62017400 |
| F    | 0.51893000  | 1.09607700  | -0.59788500 |
| F    | 0.47288700  | -0.01343300 | 1.26904000  |

**Table S-15.** Geometric coordinates and thermally corrected MP2 energies for ortho [A(THF)<sub>2</sub>(benzotrifluoride)]<sup>‡</sup>.

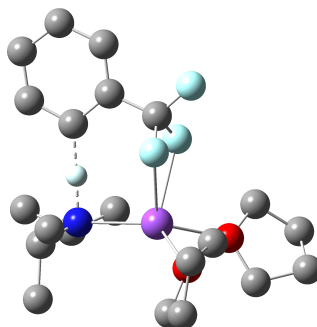

G = -1487.85847 Hartree  
 G<sub>MP2</sub> = -1483.23883 Hartree

| Atom | X           | Y           | Z           | Atom | X           | Y           | Z           |
|------|-------------|-------------|-------------|------|-------------|-------------|-------------|
| Na   | 0.00000000  | 0.00000000  | 0.00000000  | H    | 4.57048400  | -2.90105400 | 0.99618700  |
| N    | -1.73284100 | 0.87952800  | 1.30232000  | C    | 2.57202200  | -3.83213300 | 0.81248300  |
| C    | -1.92710400 | 2.33536500  | 1.28821700  | H    | 2.57832600  | -4.01546500 | 1.89321500  |
| C    | -0.96138900 | 3.10414200  | 2.20993300  | H    | 2.71776800  | -4.79118100 | 0.30696500  |
| H    | -1.10395100 | 4.18820800  | 2.10914700  | C    | 1.26815300  | -3.14483600 | 0.39046200  |
| H    | 0.08175200  | 2.86988500  | 1.95189600  | H    | 0.99306900  | -3.38293700 | -0.64317600 |
| H    | -1.10431400 | 2.85253800  | 3.26607900  | H    | 0.42064900  | -3.38468000 | 1.03904900  |
| C    | -1.78843700 | 2.85019700  | -0.15324700 | O    | 1.75085400  | 1.21850300  | -1.06984200 |
| H    | -2.00810700 | 3.92377000  | -0.20886700 | C    | 1.95143700  | 1.05144500  | -2.48956900 |
| H    | -2.47118200 | 2.32229200  | -0.82509700 | H    | 1.10072900  | 0.48833500  | -2.87862600 |
| H    | -0.76437800 | 2.70108700  | -0.52585700 | H    | 2.87288200  | 0.47653900  | -2.66570100 |
| H    | -2.95077000 | 2.60715500  | 1.61282400  | C    | 2.07044300  | 2.47047900  | -3.03757200 |
| C    | -1.93824000 | 0.25213900  | 2.61961100  | H    | 2.57630500  | 2.50923700  | -4.00686300 |
| C    | -3.36765600 | 0.39314400  | 3.18992100  | H    | 1.07482200  | 2.91425600  | -3.14919100 |
| H    | -3.43358800 | -0.05642300 | 4.18933100  | C    | 2.85695600  | 3.16821100  | -1.91524300 |
| H    | -4.09647700 | -0.10702200 | 2.54261700  | H    | 2.70389100  | 4.25080800  | -1.89116400 |
| H    | -3.66622500 | 1.44317200  | 3.28468700  | H    | 3.93082300  | 2.98388700  | -2.03408300 |
| C    | -1.56935000 | -1.23763800 | 2.53136100  | C    | 2.32637200  | 2.47986900  | -0.64574400 |
| H    | -1.74312900 | -1.74580100 | 3.48816200  | H    | 3.11470700  | 2.28133200  | 0.08947000  |
| H    | -0.50917200 | -1.36841800 | 2.27649000  | H    | 1.53525700  | 3.05965900  | -0.15964800 |
| H    | -2.17179100 | -1.74011200 | 1.76568200  | C    | -1.94326700 | -1.22143500 | -1.98314600 |
| H    | -1.25675900 | 0.70179400  | 3.36294100  | C    | -3.36045800 | -0.89928000 | -1.65297400 |
| O    | 1.52173500  | -1.72019000 | 0.47247600  | C    | -4.36546700 | -1.34843500 | -2.52336800 |
| C    | 2.90693500  | -1.48235200 | 0.79162800  | C    | -5.69309500 | -1.04306300 | -2.23532500 |
| H    | 2.99863900  | -1.24999300 | 1.86271400  | C    | -5.98747600 | -0.29641200 | -1.09112400 |
| H    | 3.23420300  | -0.61481800 | 0.21270900  | C    | -4.95848400 | 0.13220500  | -0.24694000 |
| C    | 3.63253200  | -2.78198700 | 0.44565000  | C    | -3.60046400 | -0.14952100 | -0.48185900 |
| H    | 3.85695000  | -2.81998700 | -0.62709000 | H    | -5.23156900 | 0.71415000  | 0.63511300  |
|      |             |             |             | H    | -7.02349200 | -0.05024600 | -0.86182700 |

H -6.48687700 -1.38235600 -2.89597100  
H -4.11773500 -1.92621700 -3.40978200  
F -1.15939700 -0.08650600 -2.16007700  
F -1.75807500 -1.96227600 -3.09045800  
F -1.28834300 -1.88908200 -0.96633600  
H -2.59864100 0.36972000 0.46477500

**Table S-16.** Geometric coordinates and thermally corrected MP2 energies for meta [A(THF)<sub>2</sub>(benzotrifluoride)]<sup>‡</sup>.

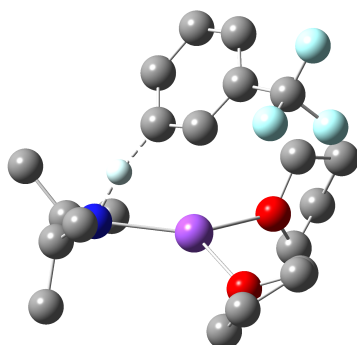

G = -1487.849176 Hartree  
G<sub>MP2</sub> = -1483.233186 Hartree

| Atom | X          | Y           | Z          | H | 2.04282300  | 1.90348800  | 2.61882400  |
|------|------------|-------------|------------|---|-------------|-------------|-------------|
| C    | 0.00000000 | 0.00000000  | 0.00000000 | C | -0.47156000 | -2.31307600 | 0.65106900  |
| N    | 0.53833500 | -1.25360700 | 0.53323600 | C | -0.86757500 | -2.95256100 | -0.69948000 |
| Na   | 2.41666100 | -1.35135000 | 1.93539900 | H | -1.69333600 | -3.66619200 | -0.57793700 |
| O    | 3.65376800 | -2.94156400 | 3.09053000 | H | -0.01855300 | -3.48772400 | -1.14131400 |
| C    | 3.34327100 | -3.49963200 | 4.38232100 | H | -1.19127000 | -2.19356500 | -1.41989300 |
| H    | 2.26750000 | -3.38821000 | 4.55312800 | C | 0.02017000  | -3.40357000 | 1.61669400  |
| H    | 3.88103500 | -2.93828300 | 5.15985000 | H | -0.70671300 | -4.22064400 | 1.70715300  |
| C    | 3.80959400 | -4.95377300 | 4.32234000 | H | 0.18127200  | -2.98858200 | 2.62165400  |
| H    | 4.02239700 | -5.36822200 | 5.31225900 | H | 0.96450400  | -3.83961800 | 1.26491100  |
| H    | 3.04501800 | -5.57814100 | 3.84561200 | H | -1.39680600 | -1.90051900 | 1.08967100  |
| C    | 5.05227800 | -4.84310500 | 3.42508700 | C | -0.81120500 | 0.79218600  | 1.04544100  |
| H    | 5.32262900 | -5.78728600 | 2.94364900 | H | -1.24985600 | 1.70053700  | 0.61052300  |
| H    | 5.91489000 | -4.50380200 | 4.01072300 | H | -0.16323100 | 1.09005700  | 1.88182100  |
| C    | 4.63328100 | -3.77552700 | 2.40944800 | H | -1.63100100 | 0.19564500  | 1.46059900  |
| H    | 5.45673600 | -3.13883400 | 2.07678300 | C | 1.13463200  | 0.87772700  | -0.54890900 |
| H    | 4.15347000 | -4.20773100 | 1.52526700 | H | 0.74327200  | 1.82454800  | -0.94022600 |
| O    | 3.47553500 | 0.46579400  | 2.92099100 | H | 1.67946100  | 0.37065200  | -1.35059600 |
| C    | 4.89795700 | 0.48699000  | 3.15047100 | H | 1.85691300  | 1.12247200  | 0.24384600  |
| H    | 5.32230200 | -0.40314900 | 2.68525600 | H | -0.68345800 | -0.18991000 | -0.85060000 |
| H    | 5.08418100 | 0.44937900  | 4.23350400 | C | 4.05065000  | -1.40942200 | -0.44310500 |
| C    | 5.40412000 | 1.80906700  | 2.53429600 | C | 5.32550900  | -1.87166100 | -0.81131600 |
| H    | 6.13104000 | 2.29442800  | 3.19224700 | C | 5.46688500  | -3.11805000 | -1.42367800 |
| H    | 5.89241000 | 1.62595700  | 1.57458700 | C | 4.32320800  | -3.88903000 | -1.64629900 |
| C    | 4.11570300 | 2.65869600  | 2.35591300 | C | 3.07132900  | -3.42516800 | -1.22914200 |
| H    | 3.87094500 | 2.76779200  | 1.29503000 | C | 2.87999500  | -2.16824200 | -0.61781100 |
| H    | 4.20344100 | 3.66146800  | 2.78420900 | H | 2.20886200  | -4.07300200 | -1.39848600 |
| C    | 3.03769000 | 1.82642300  | 3.06260400 | H | 4.41862500  | -4.85506600 | -2.13919300 |
| H    | 2.97195100 | 2.07751600  | 4.13236300 | H | 6.44734700  | -3.47418300 | -1.72409400 |



C 6.53327500 -1.06783500 -0.44594500  
F 6.33545200 0.26861000 -0.58474900  
F 6.87619300 -1.24878300 0.87278400  
F 7.63028500 -1.38552400 -1.16372400  
H 3.98937500 -0.40563800 -0.01420400  
H 1.58150600 -1.69258000 -0.14351100

**Table S-17.** Geometric coordinates and thermally corrected MP2 energies for para [A(THF)<sub>2</sub>(benzotrifluoride)]<sup>‡</sup>.

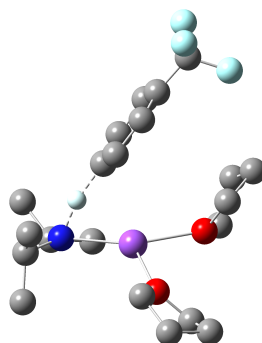

G = -1487.846339 Hartree  
G<sub>MP2</sub> = -1483.229946 Hartree

| Atom | X           | Y          | Z           | Atom | X           | Y           | Z           |
|------|-------------|------------|-------------|------|-------------|-------------|-------------|
| H    | 1.04584200  | 4.78481400 | -1.26881700 | H    | 1.04584200  | 4.78481400  | -1.26881700 |
| C    | 0.00000000  | 0.00000000 | 0.00000000  | C    | 0.76029200  | -0.55604000 | 2.25207900  |
| N    | 0.88930300  | 0.35391800 | 1.10793700  | C    | 1.49441400  | -1.90155000 | 2.05694300  |
| Na   | 1.59641500  | 2.55622400 | 1.50479100  | H    | 1.30404700  | -2.58990500 | 2.89127300  |
| O    | 2.87430000  | 3.92784900 | 2.92867400  | H    | 2.57727600  | -1.74551300 | 1.98255400  |
| C    | 3.27066800  | 3.61143300 | 4.27788300  | H    | 1.16811000  | -2.39848400 | 1.13682500  |
| H    | 2.71351400  | 2.72222400 | 4.58486200  | C    | 1.25536400  | 0.12685800  | 3.53763600  |
| H    | 3.00505900  | 4.44455800 | 4.94611500  | H    | 1.17858500  | -0.53923200 | 4.40620100  |
| C    | 4.78147000  | 3.41336800 | 4.20218300  | H    | 0.66092600  | 1.02604000  | 3.75278000  |
| H    | 5.27148200  | 3.51495400 | 5.17523600  | H    | 2.31025300  | 0.41909800  | 3.44315000  |
| H    | 5.00572400  | 2.42133900 | 3.79745100  | H    | -0.30508500 | -0.79366400 | 2.41845600  |
| C    | 5.19549000  | 4.50606000 | 3.19996600  | C    | -1.44557300 | 0.48771100  | 0.23049000  |
| H    | 6.10279500  | 4.25191200 | 2.64722400  | H    | -2.11914900 | 0.15365000  | -0.57083300 |
| H    | 5.36522500  | 5.45639600 | 3.71840600  | H    | -1.47064800 | 1.58591600  | 0.26693600  |
| C    | 3.97559200  | 4.60843100 | 2.26426500  | H    | -1.84862800 | 0.11558700  | 1.17920900  |
| H    | 3.68247800  | 5.64719800 | 2.07047000  | C    | 0.53157300  | 0.56525500  | -1.32493400 |
| H    | 4.14391700  | 4.10265300 | 1.30938600  | H    | -0.14301800 | 0.32090400  | -2.15438100 |
| O    | 0.47976700  | 4.42099700 | 0.68769900  | H    | 1.52421200  | 0.16857700  | -1.55780800 |
| C    | 0.08550400  | 5.49683300 | 1.56506800  | H    | 0.60988100  | 1.66141900  | -1.27765400 |
| H    | 0.84483300  | 5.57569300 | 2.34713900  | H    | -0.05247800 | -1.09847200 | -0.13034000 |
| H    | -0.88099500 | 5.25265000 | 2.02972600  | C    | 3.88122100  | 1.82003500  | -0.56652900 |
| C    | -0.03182100 | 6.72377400 | 0.66338300  | C    | 5.18578100  | 2.28799200  | -0.76393900 |
| H    | -0.68064900 | 7.49711500 | 1.08501600  | C    | 6.19268100  | 1.91303000  | 0.12999600  |
| H    | 0.95698600  | 7.16351100 | 0.48697100  | C    | 5.88514500  | 1.05792600  | 1.19529900  |
| C    | -0.58793500 | 6.10278900 | -0.62843400 | C    | 4.57100900  | 0.61892900  | 1.36883400  |
| H    | -0.39027700 | 6.70579300 | -1.51924800 | C    | 3.51363000  | 0.98491300  | 0.50937800  |
| H    | -1.67243400 | 5.96737200 | -0.54712200 | H    | 4.37015200  | -0.04487800 | 2.21257900  |
| C    | 0.12235100  | 4.74273600 | -0.67847100 | H    | 6.67325600  | 0.74394100  | 1.87580900  |
| H    | -0.50904600 | 3.94193600 | -1.07578400 | C    | 7.57041900  | 2.48602800  | 0.00600800  |

F 7.71666400 3.61945700 0.75920600  
F 7.87668600 2.83909800 -1.26258800  
F 8.52893900 1.63179700 0.43083900  
H 5.42635000 2.93336300 -1.60528000  
H 3.12658800 2.11805500 -1.29877500  
H 2.15322700 0.51702600 0.75550500

**Table S-18.** Geometric coordinates and thermally corrected MP2 energies for ortho [A(THF)<sub>3</sub>(benzotrifluoride)]<sup>‡</sup>.

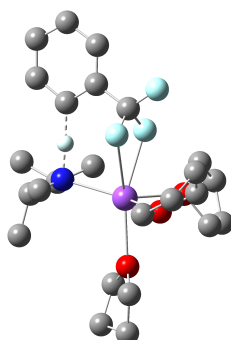

G = -1720.205921 Hartree  
G<sub>MP2</sub> = -1714.818508 Hartree

| Atom | X           | Y           | Z           | Atom | X           | Y           | Z           |
|------|-------------|-------------|-------------|------|-------------|-------------|-------------|
| Na   | 0.00000000  | 0.00000000  | 0.00000000  | H    | -2.90457400 | -0.27502500 | 3.80423500  |
| N    | 1.31298700  | -1.98633500 | -0.33263100 | C    | -1.01095400 | 0.62192100  | 4.45821000  |
| C    | 1.35919400  | -2.52257800 | -1.70073600 | H    | -0.76499900 | -0.41339000 | 4.71093100  |
| C    | 0.11653400  | -3.33480900 | -2.10959800 | H    | -0.91672700 | 1.21849800  | 5.37035300  |
| H    | 0.19422400  | -3.66211700 | -3.15466800 | C    | -0.08198200 | 1.13687000  | 3.34469500  |
| H    | -0.78665500 | -2.71644500 | -2.01251500 | H    | 0.10658500  | 2.21645600  | 3.44848000  |
| H    | -0.01939400 | -4.23138100 | -1.49520900 | H    | 0.87389200  | 0.61750300  | 3.27652000  |
| C    | 1.55390800  | -1.36430500 | -2.68966800 | O    | -0.64208800 | 2.05125600  | -1.14700200 |
| H    | 1.71944100  | -1.74020800 | -3.70744800 | C    | -0.49152600 | 3.26254000  | -0.37360300 |
| H    | 2.40826500  | -0.74519300 | -2.40569000 | H    | -0.03645200 | 2.99241000  | 0.58162000  |
| H    | 0.65888100  | -0.72386400 | -2.71671100 | H    | -1.48604900 | 3.69301800  | -0.18374600 |
| H    | 2.23193500  | -3.19195900 | -1.83588000 | C    | 0.36409900  | 4.19393600  | -1.22997400 |
| C    | 1.10925200  | -3.00764300 | 0.70828500  | H    | 0.21408700  | 5.24888700  | -0.98073400 |
| C    | 2.15122500  | -4.14952400 | 0.73779200  | H    | 1.42254500  | 3.95125200  | -1.10064600 |
| H    | 1.89021300  | -4.88935000 | 1.50598400  | C    | -0.10693500 | 3.83174300  | -2.64700600 |
| H    | 3.14952900  | -3.76199200 | 0.96696800  | H    | 0.62324700  | 4.08129800  | -3.42231400 |
| H    | 2.20720000  | -4.67870200 | -0.21970000 | H    | -1.04290400 | 4.35203200  | -2.88337200 |
| C    | 1.07638900  | -2.32165000 | 2.08345800  | C    | -0.34073600 | 2.31945000  | -2.53799700 |
| H    | 0.95224700  | -3.05683500 | 2.88880000  | H    | -1.17978700 | 1.96950300  | -3.14965700 |
| H    | 0.24534800  | -1.60848000 | 2.15472800  | H    | 0.55379600  | 1.75053100  | -2.81034800 |
| H    | 2.01094200  | -1.77663400 | 2.25934200  | F    | 2.39945900  | 1.48376900  | -1.08900000 |
| H    | 0.12545200  | -3.49669900 | 0.57340200  | C    | 2.99298000  | 1.46422100  | 0.14600600  |
| O    | -0.79578900 | 0.89681600  | 2.12247400  | C    | 4.12722100  | 0.49778000  | 0.23653200  |
| C    | -2.16212300 | 1.22639200  | 2.39947500  | C    | 5.41705500  | 1.00422000  | 0.45690800  |
| H    | -2.76823800 | 0.75890700  | 1.62219500  | C    | 6.49289200  | 0.12076700  | 0.49458800  |
| H    | -2.29103600 | 2.31906100  | 2.34675800  | C    | 6.25875600  | -1.24355500 | 0.30440900  |
| C    | -2.42944300 | 0.71036000  | 3.82739100  | C    | 4.95794500  | -1.71025200 | 0.09029200  |
| H    | -3.09354100 | 1.38345900  | 4.37806700  | C    | 3.83070900  | -0.86909700 | 0.05086500  |
|      |             |             |             | H    | 4.82349800  | -2.78336000 | -0.05691400 |

H 7.09551700 -1.94093700 0.32337600  
H 7.49992700 0.49303200 0.66574300  
H 5.58096600 2.06967700 0.59440600  
F 3.31505600 2.75172100 0.41718800  
F 1.95322500 1.16151300 1.00801500  
H 2.48029800 -1.44211800 -0.13817900  
O -2.30573300 -0.73594400 -0.35553500  
C -3.08972800 -0.28464700 -1.47882800  
H -2.55499400 -0.52009700 -2.41001500  
H -3.19103500 0.80089000 -1.40174800  
C -4.40900100 -1.05224200 -1.39353700  
H -5.09795700 -0.55555500 -0.69950800  
H -4.90755900 -1.14103600 -2.36344000  
C -3.94509000 -2.40083400 -0.82051700  
H -3.52592300 -3.02760300 -1.61595100  
H -4.74493200 -2.96452600 -0.33117100  
C -2.84552700 -1.97551600 0.15908700  
H -3.25065300 -1.78447100 1.16225000  
H -2.03102900 -2.69990100 0.24232800

**Table S-19.** Geometric coordinates and thermally corrected MP2 energies for meta [A(THF)<sub>3</sub>(benzotrifluoride)]<sup>‡</sup>.

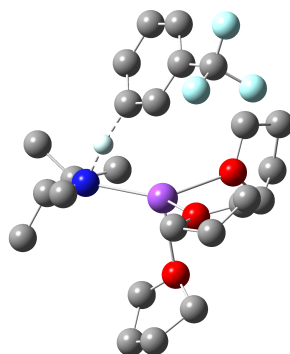

G = -1720.199407 Hartree  
 G<sub>MP2</sub> = -1714.815785 Hartree

| Atom | X           | Y           | Z           |   |             |             |             |
|------|-------------|-------------|-------------|---|-------------|-------------|-------------|
| Na   | 0.00000000  | 0.00000000  | 0.00000000  | H | -0.15709600 | 1.34588300  | 4.19055700  |
| N    | 0.82927000  | 1.88074100  | -1.23603600 | C | -2.23985600 | 0.72195900  | 4.00293100  |
| C    | 1.17150800  | 1.80600200  | -2.66015200 | H | -2.57567600 | 1.70991600  | 4.33087600  |
| C    | 2.67450400  | 1.61705800  | -2.93931500 | H | -2.88194100 | -0.02493000 | 4.48405200  |
| H    | 2.86258500  | 1.53675000  | -4.01779800 | C | -2.28696100 | 0.57390700  | 2.47114500  |
| H    | 3.03786800  | 0.69661800  | -2.46135400 | H | -3.16998300 | 0.03044700  | 2.12134700  |
| H    | 3.27670600  | 2.45117600  | -2.56351600 | H | -2.24833700 | 1.53306300  | 1.94901900  |
| C    | 0.38899700  | 0.65533900  | -3.30800600 | O | -0.87357000 | -2.14747500 | -0.74471800 |
| H    | 0.56295300  | 0.62031800  | -4.39080000 | C | -1.84938900 | -2.83292700 | 0.08259300  |
| H    | -0.68691000 | 0.76706100  | -3.14125300 | H | -2.45227500 | -2.08208400 | 0.59466800  |
| H    | 0.70959600  | -0.30914400 | -2.88824300 | H | -1.30867300 | -3.42706600 | 0.83228400  |
| H    | 0.86615900  | 2.72686500  | -3.19546400 | C | -2.65806700 | -3.71814600 | -0.86735000 |
| C    | 1.49449300  | 2.97046500  | -0.50813900 | H | -3.05556300 | -4.60745300 | -0.36891200 |
| C    | 1.24035100  | 4.38625700  | -1.07401800 | H | -3.49708000 | -3.15231600 | -1.28244900 |
| H    | 1.75705400  | 5.14618100  | -0.47348800 | C | -1.63007900 | -4.04225600 | -1.96143100 |
| H    | 0.16929000  | 4.62139100  | -1.07388800 | H | -2.08517200 | -4.33927100 | -2.91090200 |
| H    | 1.59990800  | 4.48421900  | -2.10393600 | H | -0.96092300 | -4.84869500 | -1.63705000 |
| C    | 1.07744100  | 2.92790800  | 0.97137100  | C | -0.86587500 | -2.72197600 | -2.07231200 |
| H    | 1.57974000  | 3.71710300  | 1.54443900  | H | 0.17615000  | -2.84090100 | -2.38617500 |
| H    | 1.34240600  | 1.96625300  | 1.43038300  | H | -1.36073100 | -2.02782000 | -2.76263300 |
| H    | -0.00398500 | 3.06985900  | 1.07890100  | O | 1.99664000  | -1.07192400 | 0.84553600  |
| H    | 2.59101700  | 2.82435100  | -0.52421800 | C | 2.23802800  | -2.47531700 | 0.66560400  |
| O    | -1.09551500 | -0.17189600 | 2.09552600  | H | 1.29974600  | -2.92054500 | 0.32795000  |
| C    | -0.40885500 | -0.60083100 | 3.28306100  | H | 2.53517500  | -2.93356100 | 1.62226600  |
| H    | 0.65371700  | -0.66828500 | 3.03816100  | C | 3.37337300  | -2.53977200 | -0.35340600 |
| H    | -0.76767900 | -1.59835600 | 3.58316400  | H | 3.90258100  | -3.49767400 | -0.34455500 |
| C    | -0.76386400 | 0.44472100  | 4.33686500  | H | 2.97702700  | -2.37444200 | -1.36179600 |
| H    | -0.61134600 | 0.08793600  | 5.36024600  | C | 4.25844400  | -1.35610500 | 0.08287700  |
|      |             |             |             | H | 4.80978400  | -0.91368900 | -0.75162400 |

H 4.99086800 -1.68218700 0.82938900  
C 3.25227000 -0.36185300 0.70445500  
H 3.57923000 -0.01130300 1.69136900  
H 3.05308000 0.50299200 0.06767100  
C -2.77284500 0.95961100 -1.09734700  
C -4.14891300 1.00197500 -0.81531600  
C -4.73752300 2.18587800 -0.36651300  
C -3.92988300 3.31289900 -0.20188900  
C -2.55740900 3.23510300 -0.46061100  
C -1.91956800 2.06270100 -0.91886200  
H -1.96227100 4.13647000 -0.29803600  
H -4.37797700 4.24721100 0.13252900  
H -5.80207800 2.22568300 -0.15814500  
C -4.95929500 -0.25099300 -0.91098600  
F -4.62281900 -1.01111300 -1.98851700  
F -4.76949200 -1.06574200 0.17757100  
F -6.28915400 -0.03033900 -0.98438800  
H -2.37172500 0.01453800 -1.46975500  
H -0.46230100 2.02839900 -1.13904500

**Table S-20.** Geometric coordinates and thermally corrected MP2 energies for para [A(THF)<sub>3</sub>(benzotrifluoride)]<sup>‡</sup>.

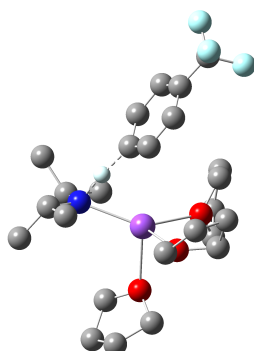

G = -1720.196051 Hartree  
G<sub>MP2</sub> = -1714.810885 Hartree

| Atom | X           | Y           | Z           |   |             |             |             |
|------|-------------|-------------|-------------|---|-------------|-------------|-------------|
| Na   | 0.00000000  | 0.00000000  | 0.00000000  | H | -0.11060200 | 1.08010800  | 4.13491500  |
| N    | 0.24197200  | 2.19081600  | -0.96051900 | C | -2.14199400 | 0.31905100  | 3.82246200  |
| C    | 0.59175200  | 2.43135500  | -2.36413600 | H | -2.36481400 | 1.36957700  | 3.61750500  |
| C    | 2.06282200  | 2.82777100  | -2.59561100 | H | -2.83895200 | -0.02274600 | 4.59335000  |
| H    | 2.26494900  | 2.95687100  | -3.66670800 | C | -2.27214100 | -0.52904400 | 2.54058300  |
| H    | 2.73398700  | 2.04503400  | -2.21583000 | H | -2.73005200 | -1.50573600 | 2.75632600  |
| H    | 2.32716800  | 3.76746400  | -2.09948600 | H | -2.82361700 | -0.04138200 | 1.73651000  |
| C    | 0.28171600  | 1.17404900  | -3.18821900 | O | -0.23934700 | -2.23512800 | -0.96408700 |
| H    | 0.47649400  | 1.34202900  | -4.25466600 | C | -0.91807100 | -3.24200200 | -0.19301700 |
| H    | -0.76682900 | 0.88116300  | -3.08034800 | H | -1.11553200 | -2.81366200 | 0.79047000  |
| H    | 0.91708400  | 0.33803300  | -2.85969600 | H | -0.26596200 | -4.12362100 | -0.08400100 |
| H    | -0.02289000 | 3.24447400  | -2.79948300 | C | -2.16366300 | -3.56967700 | -1.01737500 |
| C    | 0.50414800  | 3.33158000  | -0.07209600 | H | -2.56878500 | -4.56045300 | -0.79099800 |
| C    | -0.25891200 | 4.62620600  | -0.43342000 | H | -2.94075400 | -2.82597500 | -0.81799300 |
| H    | -0.01789300 | 5.43378300  | 0.27021600  | C | -1.65402400 | -3.44518200 | -2.47488800 |
| H    | -1.34256000 | 4.46108300  | -0.40689100 | H | -2.37811700 | -2.92732900 | -3.10966200 |
| H    | -0.00314500 | 4.98075200  | -1.43771200 | H | -1.46736300 | -4.42673200 | -2.92152200 |
| C    | 0.19314300  | 2.93742100  | 1.38093700  | C | -0.33288500 | -2.64728500 | -2.34156100 |
| H    | 0.40765800  | 3.76569600  | 2.06755600  | H | 0.53616200  | -3.27340100 | -2.58893500 |
| H    | 0.80219600  | 2.07949300  | 1.69425700  | H | -0.29717400 | -1.74404000 | -2.95332100 |
| H    | -0.86194600 | 2.66717100  | 1.50228100  | O | 2.23999800  | -0.55613900 | 0.74841900  |
| H    | 1.57938500  | 3.58755700  | -0.09227800 | C | 2.87808400  | -1.78521000 | 0.36177400  |
| O    | -0.92402700 | -0.73953100 | 2.07566400  | H | 2.10856600  | -2.41936800 | -0.08315900 |
| C    | -0.12372100 | -0.90629600 | 3.25571000  | H | 3.29554300  | -2.28691100 | 1.24883000  |
| H    | 0.91864100  | -0.77184400 | 2.96087900  | C | 3.98275500  | -1.36018900 | -0.60252400 |
| H    | -0.25872500 | -1.92774600 | 3.64571100  | H | 4.76623300  | -2.11608100 | -0.71454100 |
| C    | -0.65757900 | 0.13931900  | 4.24638000  | H | 3.55649100  | -1.15622900 | -1.59156700 |
| H    | -0.54892900 | -0.19064000 | 5.28397600  | C | 4.48492000  | -0.06017600 | 0.05107100  |
|      |             |             |             | H | 4.92338800  | 0.63577200  | -0.66988600 |



H 5.24832000 -0.28464700 0.80437800  
C 3.21745200 0.51615000 0.71421900  
H 3.40623500 0.86036300 1.73828700  
H 2.76848800 1.33144300 0.14133900  
C -2.98484800 0.30332400 -1.43281800  
C -4.33547800 -0.04682400 -1.33798600  
C -5.18798000 0.71004600 -0.52927700  
C -4.67533000 1.81271500 0.16273000  
C -3.31977600 2.13050300 0.04751300  
C -2.41289900 1.39247800 -0.74248500  
H -2.96422900 3.00386100 0.59767200  
H -5.33901400 2.41620400 0.77704300  
C -6.61919900 0.30305000 -0.35566000  
F -7.42376200 1.35215100 -0.06468300  
F -6.77656100 -0.59058600 0.65986900  
F -7.12345500 -0.29370300 -1.46273900  
H -4.73431500 -0.89101500 -1.89603900  
H -2.36079100 -0.30802700 -2.08888600  
H -1.03418200 1.86432800 -0.89079100

**Table S-21.** Geometric coordinates and thermally corrected MP2 energies for 4,4-dimethyl-2-phenyl-2-oxazoline.

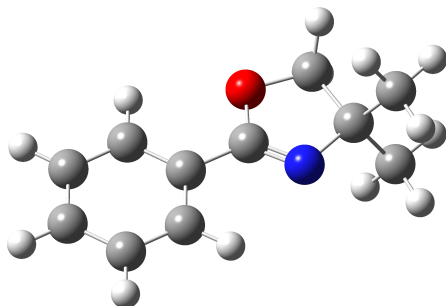

G = -556.791586 Hartree

G<sub>MP2</sub> = -554.9931048 Hartree

| Atom | X           | Y           | Z           |
|------|-------------|-------------|-------------|
| C    | 0.00000000  | 0.00000000  | 0.00000000  |
| C    | -0.27684100 | -1.53807700 | 0.00215100  |
| N    | 1.07622900  | -2.12991900 | 0.00175400  |
| C    | 1.91870600  | -1.17019800 | 0.00215400  |
| C    | 3.38494600  | -1.30775500 | 0.00216700  |
| C    | 4.21631500  | -0.17923100 | 0.00217500  |
| C    | 5.60226000  | -0.33440000 | 0.00224000  |
| C    | 6.16554500  | -1.61155800 | 0.00226100  |
| C    | 5.33804000  | -2.73883600 | 0.00223800  |
| C    | 3.95445300  | -2.59028200 | 0.00220900  |
| H    | 3.29586200  | -3.45250500 | 0.00222600  |
| H    | 5.77379400  | -3.73428800 | 0.00226400  |
| H    | 7.24594700  | -1.72975500 | 0.00230100  |
| H    | 6.24252800  | 0.54360000  | 0.00226100  |
| H    | 3.77235100  | 0.81025500  | 0.00214100  |
| O    | 1.43926100  | 0.11310400  | 0.00259500  |
| C    | -1.02453600 | -1.98577900 | 1.26669400  |
| H    | -2.03302800 | -1.55493800 | 1.29749800  |
| H    | -1.11339600 | -3.07649900 | 1.28888500  |
| H    | -0.48643000 | -1.67075600 | 2.16732700  |
| C    | -1.02724600 | -1.98895000 | -1.25958000 |
| H    | -1.11702400 | -3.07966100 | -1.27835400 |
| H    | -2.03547000 | -1.55744100 | -1.28978000 |
| H    | -0.49060400 | -1.67706300 | -2.16216800 |
| H    | -0.38005600 | 0.50715500  | -0.89310000 |
| H    | -0.38351200 | 0.51049800  | 0.88966200  |

**Table S-22.** Geometric coordinates and thermally corrected MP2 energies for N-bound [A(THF)<sub>2</sub>(4,4-dimethyl-2-phenyl-2-oxazoline)]<sup>‡</sup>.

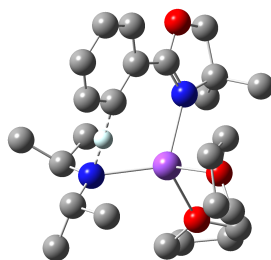

G = -1475.435071 Hartree

G<sub>MP2</sub> = -1470.593339 Hartree

| Atom | X           | Y           | Z           | Atom | X           | Y           | Z           |
|------|-------------|-------------|-------------|------|-------------|-------------|-------------|
| Na   | 0.00000000  | 0.00000000  | 0.00000000  | H    | -3.59598100 | -0.71976700 | -2.22369800 |
| N    | 0.48495200  | 1.67805300  | -1.61754100 | C    | -4.38968700 | -1.26090700 | -0.25360400 |
| C    | 0.61172600  | 3.05883700  | -1.13748500 | H    | -4.33852800 | -2.28694700 | -0.62925800 |
| C    | -0.54556200 | 3.99134500  | -1.54877400 | H    | -5.38857800 | -1.11686900 | 0.16949400  |
| H    | -0.42002200 | 4.98384600  | -1.09660000 | C    | -3.29839200 | -0.98508400 | 0.81156100  |
| H    | -1.50690700 | 3.58223200  | -1.20986800 | H    | -3.72866900 | -0.50917000 | 1.70467100  |
| H    | -0.60363500 | 4.13303800  | -2.63272700 | H    | -2.74797400 | -1.87564700 | 1.12544300  |
| C    | 0.71793900  | 3.05173300  | 0.39559700  | O    | 0.42179200  | -0.16508900 | 2.33349200  |
| H    | 0.92666900  | 4.05719600  | 0.78287400  | C    | -0.10680600 | 0.65462200  | 3.38363800  |
| H    | 1.51818000  | 2.38626400  | 0.73529600  | H    | -0.55047600 | 0.01086700  | 4.15861000  |
| H    | -0.22876400 | 2.71379600  | 0.84247700  | H    | -0.89528600 | 1.27469900  | 2.95035000  |
| H    | 1.53880600  | 3.53922100  | -1.51270100 | C    | 1.09203100  | 1.44997100  | 3.94151200  |
| C    | 0.33713800  | 1.56162800  | -3.07419200 | H    | 1.11839800  | 2.45977100  | 3.52337500  |
| C    | 1.54515100  | 2.08594500  | -3.88438700 | H    | 1.03383500  | 1.54177100  | 5.03039000  |
| H    | 1.37378200  | 1.97701400  | -4.96351600 | C    | 2.32820400  | 0.62950800  | 3.47818700  |
| H    | 2.45512000  | 1.53329900  | -3.62313100 | H    | 2.98077300  | 0.34329300  | 4.30841200  |
| H    | 1.73374000  | 3.14764400  | -3.68930600 | H    | 2.92672600  | 1.19988600  | 2.76268000  |
| C    | 0.06161000  | 0.09842000  | -3.44872400 | C    | 1.71468300  | -0.59883000 | 2.78774200  |
| H    | -0.08444100 | -0.01000700 | -4.53099500 | H    | 2.27121500  | -0.94311800 | 1.91512100  |
| H    | -0.84183100 | -0.26847200 | -2.94515100 | H    | 1.58764600  | -1.43483900 | 3.49286700  |
| H    | 0.89460500  | -0.54757600 | -3.15157300 | N    | 0.99920700  | -2.07148800 | -0.66358600 |
| H    | -0.54381300 | 2.13574700  | -3.41474100 | C    | 0.45792000  | -3.44124200 | -0.79742600 |
| O    | -2.35749000 | -0.09165100 | 0.20114500  | C    | 1.64940400  | -4.22317500 | -1.41794700 |
| C    | -3.10987400 | 0.73728400  | -0.70006000 | O    | 2.76349100  | -3.31836300 | -1.31918700 |
| H    | -2.39158400 | 1.21820900  | -1.36665200 | C    | 2.25722900  | -2.10373300 | -0.94291100 |
| H    | -3.64682400 | 1.51023300  | -0.12773200 | C    | 3.23058800  | -0.99799800 | -0.86112500 |
| C    | -4.08488100 | -0.23208500 | -1.37429700 | C    | 4.59325600  | -1.35565200 | -0.77789800 |
| H    | -4.98292300 | 0.27023000  | -1.74570300 | C    | 5.56650700  | -0.37326500 | -0.63420600 |
|      |             |             |             | C    | 5.17917100  | 0.96860000  | -0.59143700 |

C 3.82734400 1.30377600 -0.70181600  
C 2.79592800 0.35350100 -0.83540300  
H 3.56332400 2.36196900 -0.70128100  
H 5.93260500 1.74761500 -0.48432700  
H 6.61517700 -0.65076000 -0.56098300  
H 4.88177800 -2.40184600 -0.81615300  
H 1.90330000 -5.14214400 -0.88107400  
H 1.49428600 -4.46052500 -2.47711600  
C -0.77472500 -3.44726600 -1.70995500  
H -1.16505600 -4.46520800 -1.83367800  
H -1.56917800 -2.82556100 -1.28254200  
H -0.52839000 -3.04622400 -2.69814000  
C 0.10033400 -3.97412800 0.60089300  
H -0.63883900 -3.32366000 1.08118300  
H -0.31672700 -4.98712500 0.54023700  
H 0.98806200 -4.00471000 1.24237200  
H 1.58116600 0.98422000 -1.23878600

**Table S-23.** Geometric coordinates and thermally corrected MP2 energies for O-bound [A(THF)<sub>2</sub>(4,4-dimethyl-2-phenyl-2-oxazoline)]<sup>‡</sup>.

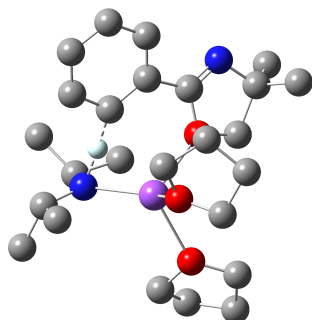

G = -1475.428268 Hartree  
G<sub>MP2</sub> = -1470.582911 Hartree

| Atom | X           | Y           | Z           | Atom | X           | Y           | Z           |
|------|-------------|-------------|-------------|------|-------------|-------------|-------------|
| Na   | 0.00000000  | 0.00000000  | 0.00000000  | H    | -3.15057800 | -1.87195900 | -2.31688100 |
| N    | -0.75341800 | 1.92260400  | -1.15417500 | C    | -3.20100800 | -3.35389800 | -0.71171900 |
| C    | -1.29609700 | 2.99501800  | -0.30955000 | H    | -3.12993200 | -4.16137100 | -1.44628500 |
| C    | -2.81192400 | 3.23182200  | -0.46712000 | H    | -3.92925200 | -3.65875900 | 0.04801500  |
| H    | -3.15633200 | 3.99795400  | 0.23942200  | C    | -1.84021000 | -3.03843500 | -0.05725900 |
| H    | -3.37061000 | 2.30815200  | -0.26394100 | H    | -1.75061000 | -3.47582300 | 0.94503300  |
| H    | -3.07981800 | 3.57193100  | -1.47250700 | H    | -0.99695200 | -3.39003500 | -0.66299400 |
| C    | -0.99910200 | 2.67961600  | 1.16569700  | O    | 0.95733500  | -0.47240100 | 2.09945400  |
| H    | -1.31114900 | 3.50474200  | 1.81798300  | C    | 1.06329800  | -1.75865300 | 2.71883600  |
| H    | 0.06991400  | 2.51217000  | 1.33375200  | H    | 0.45502800  | -2.45755100 | 2.13909600  |
| H    | -1.54618200 | 1.78111000  | 1.48784500  | H    | 0.65818400  | -1.70628700 | 3.74108800  |
| H    | -0.81129900 | 3.96915500  | -0.52546900 | C    | 2.56903900  | -2.08147600 | 2.73329700  |
| C    | -1.04122600 | 2.08338700  | -2.58528600 | H    | 2.84862600  | -2.65621900 | 3.62143100  |
| C    | -0.42126100 | 3.34874500  | -3.22110700 | H    | 2.84560600  | -2.67344500 | 1.85524900  |
| H    | -0.67074400 | 3.41824100  | -4.28811500 | C    | 3.24302400  | -0.68097600 | 2.68427100  |
| H    | 0.67065500  | 3.33440400  | -3.12385000 | H    | 3.86642500  | -0.57862300 | 1.79216100  |
| H    | -0.78599200 | 4.26323400  | -2.73996700 | H    | 3.87399600  | -0.48879300 | 3.55694600  |
| C    | -0.57114100 | 0.83980700  | -3.35341000 | C    | 2.05615500  | 0.29825500  | 2.62142100  |
| H    | -0.82880300 | 0.91489700  | -4.41732200 | H    | 1.78723500  | 0.66932100  | 3.62151800  |
| H    | -1.04432100 | -0.06569500 | -2.95125200 | H    | 2.21249600  | 1.14327800  | 1.94975800  |
| H    | 0.51446000  | 0.71770200  | -3.27662700 | C    | 1.58364700  | -2.13198600 | -2.19344000 |
| H    | -2.13189400 | 2.14929800  | -2.74746300 | C    | 3.04969000  | -2.30934600 | -2.67981300 |
| O    | -1.74404700 | -1.60247300 | 0.03509800  | N    | 3.65297100  | -0.99434600 | -2.40411100 |
| C    | -3.01055000 | -1.01583500 | -0.33762500 | C    | 2.83508200  | -0.30543900 | -1.70563400 |
| H    | -2.79360900 | -0.02528500 | -0.74477700 | C    | 3.06379700  | 1.03936000  | -1.14521600 |
| H    | -3.64512200 | -0.91144500 | 0.55535700  | C    | 4.41612600  | 1.43234400  | -1.05220500 |
| C    | -3.61024300 | -2.00581000 | -1.33082800 | C    | 4.74865800  | 2.68136300  | -0.54340300 |
| H    | -4.69327600 | -1.89541900 | -1.43897500 | C    | 3.72694300  | 3.54598400  | -0.13758600 |
|      |             |             |             | C    | 2.39449800  | 3.14402400  | -0.24922300 |

C 1.99667300 1.88435500 -0.74469500  
H 1.62221600 3.85220400 0.05313100  
H 3.97349200 4.53071200 0.25655600  
H 5.79116500 2.98053900 -0.46689200  
H 5.18963900 0.74552700 -1.38392800  
O 1.61203500 -0.91280800 -1.41998200  
C 3.79775100 -3.37844500 -1.86477200  
H 3.39234700 -4.37914200 -2.06068500  
H 4.86031200 -3.37663300 -2.12677900  
H 3.71515300 -3.17550700 -0.79034900  
C 3.12711400 -2.61990600 -4.17919000  
H 4.17200300 -2.66811500 -4.50148500  
H 2.65082600 -3.58172000 -4.40764300  
H 2.62948200 -1.83785700 -4.76204000  
H 0.87695500 -1.99604300 -3.02031300  
H 1.23361600 -2.94098500 -1.54538700  
H 0.58915900 1.86543300 -0.99317900

**Table S-24.** Geometric coordinates and thermally corrected MP2 energies for uncomplexed [A(THF)<sub>3</sub>(4,4-dimethyl-2-phenyl-2-oxazoline)]<sup>‡</sup>.

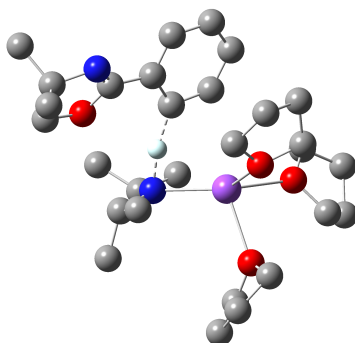

G = -1707.768871 Hartree  
G<sub>MP2</sub> = -1702.161605 Hartree

| Atom | X           | Y           | Z           |   |             |             |             |
|------|-------------|-------------|-------------|---|-------------|-------------|-------------|
| Na   | 0.00000000  | 0.00000000  | 0.00000000  | H | -0.24052000 | -2.84405600 | -3.26828500 |
| N    | 1.46190900  | -1.30882200 | 1.36391700  | C | -1.68194900 | -3.72292100 | -1.87290500 |
| C    | 2.23818700  | -2.34419800 | 0.66678300  | H | -0.84673600 | -4.37535100 | -1.60496100 |
| C    | 1.66555300  | -3.77000100 | 0.78595900  | H | -2.54536100 | -4.36083700 | -2.08505600 |
| H    | 2.24777600  | -4.47020300 | 0.17223800  | C | -2.00129100 | -2.72388000 | -0.73639700 |
| H    | 0.62305100  | -3.80084200 | 0.44149400  | H | -3.08384700 | -2.67383900 | -0.54547300 |
| H    | 1.68708000  | -4.14545300 | 1.81419300  | H | -1.48562100 | -2.93569900 | 0.20237800  |
| C    | 2.35086700  | -1.96999200 | -0.81839900 | O | -1.94276000 | 1.31780400  | 0.75265400  |
| H    | 3.01185100  | -2.66432100 | -1.35348200 | C | -3.25436300 | 1.06780600  | 0.21505000  |
| H    | 2.75630800  | -0.96114700 | -0.93812400 | H | -3.24122800 | 0.06525100  | -0.21502600 |
| H    | 1.36538800  | -2.01108100 | -1.30565000 | H | -3.47302700 | 1.79358600  | -0.58412300 |
| H    | 3.27210800  | -2.38921700 | 1.05256400  | C | -4.20399400 | 1.25416800  | 1.39474500  |
| C    | 1.25200100  | -1.59180500 | 2.79184100  | H | -5.23621400 | 1.44344500  | 1.08459300  |
| C    | 2.55282600  | -1.63936800 | 3.62516400  | H | -4.19330000 | 0.36292400  | 2.03308000  |
| H    | 2.33738400  | -1.84079000 | 4.68311300  | C | -3.55898000 | 2.44925800  | 2.11626200  |
| H    | 3.08871000  | -0.68675600 | 3.55326600  | H | -3.80576300 | 2.49520600  | 3.18076300  |
| H    | 3.22994700  | -2.42492800 | 3.27230600  | H | -3.88612100 | 3.38873600  | 1.65641800  |
| C    | 0.29044700  | -0.55989300 | 3.39849900  | C | -2.05431400 | 2.22423000  | 1.87843400  |
| H    | 0.05369900  | -0.80884100 | 4.44073900  | H | -1.52130400 | 3.15216700  | 1.64401100  |
| H    | -0.65237700 | -0.53242000 | 2.83522000  | H | -1.56434500 | 1.74894800  | 2.73331900  |
| H    | 0.73097800  | 0.44342700  | 3.38796500  | O | 0.30635400  | 1.24304200  | -2.04224600 |
| H    | 0.75530100  | -2.57041800 | 2.91123900  | C | -0.41741300 | 2.48530600  | -2.19108300 |
| O    | -1.54148500 | -1.44001800 | -1.18968600 | H | -0.92634900 | 2.69220300  | -1.24580600 |
| C    | -1.73385600 | -1.41762200 | -2.61153800 | H | -1.17433700 | 2.36304100  | -2.98034300 |
| H    | -1.12494700 | -0.60060500 | -3.00217500 | C | 0.62663100  | 3.53227100  | -2.57745600 |
| H    | -2.79462600 | -1.22160700 | -2.83728000 | H | 0.19403500  | 4.37108600  | -3.13180800 |
| C    | -1.31817300 | -2.81722700 | -3.08000800 | H | 1.12146300  | 3.91927900  | -1.68058400 |
| H    | -1.82815800 | -3.11277800 | -4.00183100 | C | 1.61510700  | 2.69740300  | -3.40561600 |
|      |             |             |             | H | 2.61223500  | 3.14254800  | -3.46281300 |

H 1.24099400 2.55949300 -4.42757900  
C 1.62472200 1.36989000 -2.64434300  
H 1.79032300 0.49864100 -3.28602700  
H 2.36949300 1.37246400 -1.84268600  
H 2.12384400 -0.17640500 1.25610100  
N 5.92632100 0.93387300 -0.59683100  
C 6.83912900 -0.22398700 -0.53767000  
C 6.06358600 -1.24282900 0.35026700  
O 4.94829900 -0.49413600 0.86974900  
C 4.95648000 0.70807000 0.21144100  
C 3.86260200 1.64942100 0.53750800  
C 4.14163900 3.01151600 0.31161600  
C 3.19223400 3.98483300 0.61156100  
C 1.96329100 3.58947100 1.14664900  
C 1.70675200 2.22848500 1.35022200  
C 2.62189400 1.19790300 1.05616500  
H 0.74048300 1.96491400 1.78794900  
H 1.21890900 4.34059000 1.41265300  
H 3.41678000 5.03702800 0.45207700  
H 5.11272100 3.29087100 -0.08783500  
H 5.67193600 -2.09361000 -0.22069900  
H 6.64419700 -1.62224600 1.19693900  
C 8.15900600 0.21709500 0.11687100  
H 8.87157100 -0.61627300 0.16723900  
H 8.61430300 1.02939100 -0.45909400  
H 7.98105800 0.58173400 1.13454400  
C 7.09336900 -0.76365800 -1.95109900  
H 7.56419700 0.00539600 -2.57237900  
H 7.75388800 -1.63981800 -1.92695100  
H 6.15114900 -1.05453700 -2.42839200



**Table S-25.** Geometric coordinates and thermally corrected MP2 energies for 1,3-dimethoxybenzene.

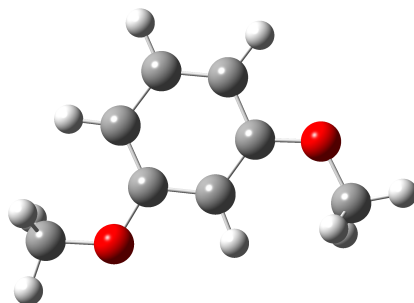

G = -461.148072 Hartree

G<sub>MP2</sub> = -459.6873481 Hartree

| Atom | X           | Y           | Z           |
|------|-------------|-------------|-------------|
| C    | 0.00000000  | 0.00000000  | 0.00000000  |
| O    | 0.34788700  | 1.37448000  | -0.00004400 |
| C    | 1.67286500  | 1.70508400  | -0.00003300 |
| C    | 2.71107500  | 0.77532700  | -0.00003600 |
| C    | 4.04320700  | 1.22126200  | -0.00002700 |
| C    | 4.33791200  | 2.58624000  | -0.00001700 |
| C    | 3.27661000  | 3.50153700  | -0.00001500 |
| C    | 1.95515300  | 3.08237400  | -0.00002300 |
| H    | 1.13024800  | 3.78680900  | -0.00002000 |
| H    | 3.49820300  | 4.56560400  | -0.00000700 |
| H    | 5.36029600  | 2.94419900  | -0.00001100 |
| O    | 4.97946200  | 0.22475000  | -0.00003100 |
| C    | 6.34786400  | 0.59505200  | -0.00001700 |
| H    | 6.60952100  | 1.17606000  | 0.89437600  |
| H    | 6.91149700  | -0.33995600 | -0.00001700 |
| H    | 6.60953700  | 1.17606900  | -0.89439900 |
| H    | 2.53540800  | -0.29321000 | -0.00004700 |
| H    | -1.09119200 | -0.03321200 | 0.00002300  |
| H    | 0.37874100  | -0.51272500 | -0.89421100 |
| H    | 0.37877900  | -0.51267600 | 0.89422200  |

**Table S-26.** Geometric coordinates and thermally corrected MP2 energies for [A(THF)<sub>2</sub>(1,3-dimethoxybenzene)]<sup>‡</sup>.

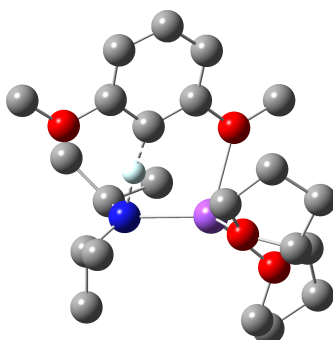

G = -1379.782638 Hartree  
 G<sub>MP2</sub> = -1375.278621 Hartree

| Atom | X           | Y           | Z           | Atom | X           | Y           | Z           |
|------|-------------|-------------|-------------|------|-------------|-------------|-------------|
| Na   | 0.00000000  | 0.00000000  | 0.00000000  | H    | 5.12367100  | 0.32075400  | -1.05504200 |
| N    | -1.00529800 | -2.08863900 | 0.14066700  | C    | 4.07785400  | -1.45403100 | -0.35040400 |
| C    | -1.29173300 | -2.67826900 | 1.45072500  | H    | 4.97366800  | -1.80076600 | 0.17304600  |
| C    | -0.08776200 | -3.43779800 | 2.04990000  | H    | 3.58467800  | -2.32329000 | -0.80010000 |
| H    | -0.35603400 | -3.92737600 | 2.99634600  | C    | 3.10995100  | -0.71569200 | 0.57317700  |
| H    | 0.73507700  | -2.73737300 | 2.25345600  | H    | 2.40480700  | -1.37524500 | 1.08710500  |
| H    | 0.29127100  | -4.21274700 | 1.37465500  | H    | 3.64391800  | -0.11121600 | 1.31898400  |
| C    | -1.73824500 | -1.59239000 | 2.44105900  | O    | -0.13640300 | 1.76156600  | 1.53058700  |
| H    | -1.93959400 | -2.02725800 | 3.42853500  | C    | 0.79277800  | 2.84980700  | 1.59939200  |
| H    | -2.64733400 | -1.09592900 | 2.09356300  | H    | 1.68355500  | 2.55081100  | 1.04179100  |
| H    | -0.95015100 | -0.83583900 | 2.57323400  | H    | 1.07208500  | 3.02306800  | 2.64983400  |
| H    | -2.12480200 | -3.40648800 | 1.39043800  | C    | 0.04737700  | 4.06831900  | 1.01675100  |
| C    | -0.91840100 | -3.08853100 | -0.93158000 | H    | 0.30265200  | 4.98582600  | 1.55573200  |
| C    | -2.29442600 | -3.60759600 | -1.41012800 | H    | 0.30979500  | 4.22139200  | -0.03473300 |
| H    | -2.18266300 | -4.42049800 | -2.14085400 | C    | -1.45345400 | 3.68724000  | 1.16152600  |
| H    | -2.86972000 | -2.80079000 | -1.87775400 | H    | -1.92885200 | 3.59275400  | 0.18127900  |
| H    | -2.88629000 | -3.99175000 | -0.57235900 | H    | -2.02042200 | 4.42374600  | 1.73860700  |
| C    | -0.13751800 | -2.51577100 | -2.12579100 | C    | -1.42040000 | 2.31956600  | 1.86429100  |
| H    | -0.07691400 | -3.23716400 | -2.95136300 | H    | -1.49198100 | 2.42424100  | 2.95705100  |
| H    | 0.88711800  | -2.25672100 | -1.82558800 | H    | -2.18128400 | 1.61967400  | 1.51513300  |
| H    | -0.62067000 | -1.60796900 | -2.50670600 | O    | -1.05772900 | 0.96660600  | -1.85438600 |
| H    | -0.35062000 | -3.97014600 | -0.58448100 | C    | -2.44111600 | 0.87371000  | -1.58141900 |
| O    | 2.34906100  | 0.16816300  | -0.28594500 | C    | -2.79319100 | -0.12828000 | -0.67889900 |
| C    | 3.00942200  | 0.29998200  | -1.56565700 | C    | -4.16389900 | -0.21583700 | -0.39277600 |
| H    | 3.08708500  | 1.36536300  | -1.80811500 | C    | -5.12292300 | 0.64349200  | -0.95458000 |
| H    | 2.39122800  | -0.19120400 | -2.32811400 | C    | -4.69886700 | 1.62713000  | -1.84794300 |
| C    | 4.37056400  | -0.38845400 | -1.41815200 | C    | -3.35036100 | 1.76213200  | -2.17648500 |
| H    | 4.72800900  | -0.80801000 | -2.36304700 | H    | -3.04237000 | 2.53404600  | -2.87415700 |
|      |             |             |             | H    | -5.42932700 | 2.29755200  | -2.29452400 |

H -6.17827500 0.55846500 -0.71891000  
O -4.50744500 -1.22157300 0.48994900  
C -5.87402300 -1.42860800 0.78393600  
H -6.45568800 -1.66190000 -0.11907300  
H -5.91117800 -2.28297700 1.46382800  
H -6.32692200 -0.55751500 1.27964100  
C -0.63972700 1.77539900 -2.94016900  
H 0.43253500 1.60084400 -3.06158600  
H -1.15825800 1.49730400 -3.86619600  
H -0.80696900 2.84397100 -2.74627900  
H -1.94194600 -1.15257100 -0.22705000

**Table S-27.** Geometric coordinates and thermally corrected MP2 energies for [A(THF)<sub>3</sub>(1,3-dimethoxybenzene)]<sup>‡</sup>.

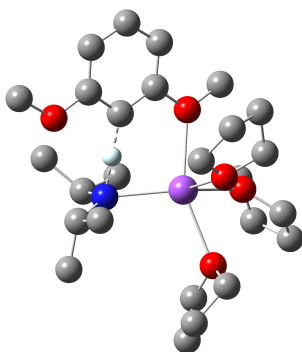

G = -1612.124014 Hartree  
G<sub>MP2</sub> = -1606.856626 Hartree

| Atom | X           | Y          | Z           | Atom | X           | Y           | Z           |
|------|-------------|------------|-------------|------|-------------|-------------|-------------|
| Na   | 0.00000000  | 0.00000000 | 0.00000000  | H    | -1.37377400 | 2.92001000  | 2.74835700  |
| N    | 1.22318300  | 1.93350300 | -0.74527100 | C    | -3.17223500 | 2.93494500  | 1.51402500  |
| C    | 1.58510700  | 3.06159100 | 0.12155600  | H    | -2.94945600 | 3.96763200  | 1.23101500  |
| C    | 0.57499300  | 4.22796500 | 0.10223600  | H    | -4.24846100 | 2.86693900  | 1.70907500  |
| H    | 0.90933700  | 5.04191800 | 0.75983000  | C    | -2.75399700 | 1.93124600  | 0.41750300  |
| H    | -0.40854600 | 3.88955700 | 0.45376400  | H    | -3.61992200 | 1.53669800  | -0.13006700 |
| H    | 0.44317600  | 4.65337300 | -0.89829200 | H    | -2.04691400 | 2.35715200  | -0.30018500 |
| C    | 1.75490300  | 2.56676400 | 1.56469400  | O    | -1.82045500 | -1.42009500 | -1.20638300 |
| H    | 2.01741300  | 3.39533800 | 2.23543300  | C    | -3.00737500 | -1.84433300 | -0.51408100 |
| H    | 2.54693300  | 1.81739300 | 1.62526400  | H    | -3.03573900 | -1.29047400 | 0.42442200  |
| H    | 0.81956500  | 2.12065600 | 1.93289800  | H    | -2.93802600 | -2.92124100 | -0.30005400 |
| H    | 2.56329300  | 3.49093200 | -0.16891400 | C    | -4.20093200 | -1.54378700 | -1.45731100 |
| C    | 1.22270400  | 2.28076200 | -2.17495900 | H    | -4.80856700 | -2.44106200 | -1.61171400 |
| C    | 2.62688800  | 2.51803900 | -2.77969900 | H    | -4.85849800 | -0.77101000 | -1.04876000 |
| H    | 2.55339500  | 2.85587300 | -3.82254500 | C    | -3.52690000 | -1.08269100 | -2.77302000 |
| H    | 3.22099800  | 1.59826600 | -2.75617600 | H    | -3.53378800 | 0.00946800  | -2.85041300 |
| H    | 3.17929200  | 3.28103000 | -2.22154200 | H    | -4.01104900 | -1.48803200 | -3.66658400 |
| C    | 0.49872300  | 1.18313100 | -2.96847600 | C    | -2.08911000 | -1.57834200 | -2.60548900 |
| H    | 0.50728600  | 1.39217000 | -4.04632600 | H    | -2.00256800 | -2.64082600 | -2.88693300 |
| H    | -0.54913300 | 1.11173400 | -2.64641900 | H    | -1.34153400 | -1.00439800 | -3.15464800 |
| H    | 0.97752500  | 0.20927400 | -2.80804700 | O    | 0.35296500  | -1.15337400 | 2.15052600  |
| H    | 0.64784900  | 3.20818800 | -2.34276700 | C    | 0.05441100  | -2.56201300 | 2.15018200  |
| O    | -2.07520700 | 0.84253300 | 1.08312000  | H    | -0.32666700 | -2.82744500 | 1.15944300  |
| C    | -2.26682600 | 0.96828400 | 2.50151600  | H    | -0.73010800 | -2.76810300 | 2.89427200  |
| H    | -1.41855200 | 0.47676000 | 2.98134400  | C    | 1.36195100  | -3.26311400 | 2.51721200  |
| H    | -3.19458900 | 0.45373000 | 2.80134200  | H    | 1.20190900  | -4.25718200 | 2.94653200  |
| C    | -2.37242100 | 2.47131100 | 2.74604100  | H    | 2.00141400  | -3.36052900 | 1.63331800  |
| H    | -2.86468500 | 2.71552800 | 3.69264300  | C    | 1.97988500  | -2.26111400 | 3.50408900  |
|      |             |            |             | H    | 3.06430900  | -2.36594100 | 3.60004400  |

H 1.53568300 -2.38132400 4.49983000  
C 1.58480600 -0.91537000 2.88674100  
H 1.39375500 -0.13648900 3.63200300  
H 2.33560600 -0.55548300 2.17698200  
O 1.49240300 -1.71599600 -0.95895500  
C 1.17548500 -2.99257000 -1.48574200  
H 1.45311900 -3.80224200 -0.79639000  
H 0.09387500 -2.99930000 -1.62341400  
H 1.67594800 -3.16555200 -2.44777300  
C 2.85116000 -1.40817600 -0.74133100  
C 3.83904900 -2.40317600 -0.82246000  
C 5.15850100 -2.03304300 -0.56155900  
C 5.48069400 -0.71679800 -0.23148300  
C 4.44746900 0.23440100 -0.17799000  
C 3.10322600 -0.07550300 -0.42544900  
O 4.68913600 1.56268900 0.12872300  
C 6.02490900 1.98001000 0.31776300  
H 6.49703700 1.48269100 1.17804300  
H 6.64159900 1.79790900 -0.57403900  
H 5.98316400 3.05504000 0.50935500  
H 6.51494400 -0.45601400 -0.03299300  
H 5.94625700 -2.78084800 -0.61768200  
H 3.61444300 -3.43228500 -1.08306500  
H 2.15538400 0.96987600 -0.56745200

**Table S-28.** Geometric coordinates and thermally corrected MP2 energies for 1,2,4-trimethoxybenzene.

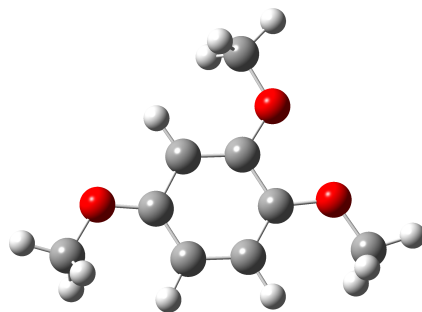

$G = -575.631702$  Hartree

$G_{\text{MP2}} = -573.8372683$  Hartree

| Atom | X           | Y           | Z           |
|------|-------------|-------------|-------------|
| C    | 0.00000000  | 0.00000000  | 0.00000000  |
| O    | -1.01121600 | 0.99094300  | -0.00019200 |
| C    | -2.31601000 | 0.56997200  | -0.00011600 |
| C    | -3.27033900 | 1.60366900  | -0.00007300 |
| C    | -4.62789400 | 1.31213000  | -0.00002400 |
| C    | -5.05945200 | -0.04157000 | 0.00000000  |
| C    | -4.10471800 | -1.04918600 | -0.00000800 |
| C    | -2.72887300 | -0.75678200 | -0.00007300 |
| H    | -2.01710800 | -1.57351100 | -0.00006200 |
| H    | -4.41268300 | -2.08856800 | 0.00002700  |
| O    | -6.41433300 | -0.22975000 | 0.00004000  |
| C    | -6.88981200 | -1.56191500 | -0.00017900 |
| H    | -6.56298100 | -2.11090600 | 0.89424100  |
| H    | -7.97944400 | -1.49178200 | -0.00072800 |
| H    | -6.56211700 | -2.11087800 | -0.89432000 |
| O    | -5.62092500 | 2.24483900  | -0.00000900 |
| C    | -5.24640700 | 3.61138200  | -0.00010300 |
| H    | -4.66401900 | 3.87101100  | -0.89444600 |
| H    | -6.18039000 | 4.17652600  | -0.00013900 |
| H    | -4.66404000 | 3.87112100  | 0.89422900  |
| H    | -2.90906200 | 2.62458400  | -0.00004700 |
| H    | -0.05550800 | -0.63615500 | -0.89414100 |
| H    | 0.95016500  | 0.53809400  | 0.00011700  |
| H    | -0.05577300 | -0.63610000 | 0.89416300  |

**Table S-29.** Geometric coordinates and thermally corrected MP2 energies for [A(THF)<sub>2</sub>(1,2,4-trimethoxybenzene)]<sup>‡</sup>.

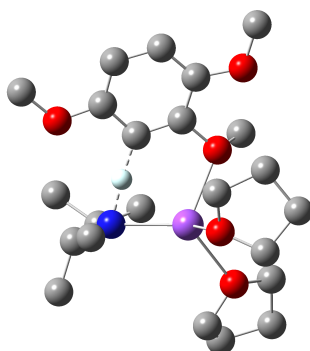

G = -1494.268476 Hartree  
G<sub>MP2</sub> = -1489.434081 Hartree

| Atom | X           | Y           | Z           | Atom | X           | Y           | Z           |
|------|-------------|-------------|-------------|------|-------------|-------------|-------------|
| Na   | 0.00000000  | 0.00000000  | 0.00000000  | H    | -4.83977700 | -1.59713000 | -1.24321500 |
| N    | 0.30142200  | 2.31236400  | -0.11815100 | C    | -4.17384100 | 0.47441800  | -1.18463100 |
| C    | 0.46085100  | 3.06402600  | 1.13143100  | H    | -5.16209700 | 0.80530100  | -0.85199700 |
| C    | -0.82532100 | 3.76467400  | 1.61173000  | H    | -3.78739800 | 1.21156100  | -1.89755000 |
| H    | -0.65609400 | 4.27944700  | 2.56680400  | C    | -3.19575800 | 0.29658000  | -0.02399900 |
| H    | -1.62805000 | 3.02829900  | 1.76096400  | H    | -2.65464400 | 1.20838700  | 0.24498700  |
| H    | -1.18588700 | 4.51253500  | 0.89718600  | H    | -3.69681300 | -0.10224500 | 0.86867800  |
| C    | 0.96032500  | 2.11841700  | 2.23472200  | O    | 0.35102900  | -1.55603000 | 1.71475600  |
| H    | 1.15408800  | 2.66806100  | 3.16457200  | C    | -0.42002600 | -2.75796800 | 1.84060300  |
| H    | 1.89091900  | 1.62566100  | 1.93652000  | H    | -1.33874600 | -2.61310800 | 1.26744600  |
| H    | 0.21178600  | 1.34412500  | 2.45970100  | H    | -0.68158000 | -2.91068300 | 2.89869100  |
| H    | 1.23415700  | 3.84914100  | 1.03092900  | C    | 0.48859200  | -3.89346500 | 1.32382000  |
| C    | -0.13060900 | 3.12656700  | -1.25983800 | H    | 0.37348900  | -4.79829500 | 1.92861100  |
| C    | 0.82844900  | 4.28337000  | -1.62432600 | H    | 0.24225900  | -4.15368400 | 0.28994100  |
| H    | 0.47196900  | 4.82609800  | -2.51012800 | C    | 1.92068500  | -3.29380100 | 1.41193600  |
| H    | 1.83432800  | 3.90047200  | -1.82914400 | H    | 2.35118400  | -3.17269700 | 0.41484000  |
| H    | 0.91316500  | 5.00850100  | -0.80775700 | H    | 2.59964900  | -3.91449900 | 2.00476900  |
| C    | -0.31918500 | 2.21762000  | -2.48452900 | C    | 1.69902400  | -1.91784600 | 2.06121400  |
| H    | -0.68866200 | 2.78410000  | -3.34876400 | H    | 1.78673700  | -1.96624700 | 3.15709300  |
| H    | -1.04170300 | 1.41810900  | -2.27118700 | H    | 2.35856400  | -1.13464900 | 1.68294800  |
| H    | 0.63078600  | 1.75080700  | -2.76782500 | O    | 1.55882200  | -0.93752700 | -1.46374500 |
| H    | -1.11724200 | 3.58623600  | -1.05921800 | C    | 2.76876000  | -0.27117900 | -1.14391200 |
| O    | -2.22139200 | -0.67386200 | -0.48261500 | C    | 2.69555500  | 1.02868100  | -0.67460200 |
| C    | -2.71804000 | -1.35727500 | -1.65449500 | C    | 3.92166100  | 1.63164000  | -0.33225600 |
| H    | -2.59381100 | -2.43554300 | -1.50805000 | C    | 5.14210200  | 0.96770300  | -0.45918600 |
| H    | -2.11552900 | -1.05013200 | -2.51946800 | C    | 5.16357900  | -0.36044700 | -0.91547100 |
| C    | -4.18120300 | -0.92906000 | -1.81064900 | C    | 3.97652000  | -1.00207900 | -1.25043300 |
| H    | -4.50781700 | -0.93776700 | -2.85468300 | O    | 3.88535300  | -2.32044700 | -1.65862400 |
|      |             |             |             | C    | 5.09309500  | -3.04471600 | -1.80504300 |

H 5.63428600 -3.12998800 -0.85250200  
H 4.80945500 -4.04268600 -2.14711700  
H 5.75624900 -2.58128700 -2.54852100  
H 6.11581400 -0.87338000 -0.99294300  
H 6.08535600 1.44195900 -0.20790800  
O 3.81805200 2.92981500 0.13420400  
C 5.00462000 3.60934900 0.48489000  
H 5.68695000 3.71225100 -0.37174200  
H 4.69950700 4.60374400 0.81905000  
H 5.54165500 3.10520200 1.30214200  
C 1.39057900 -1.23985800 -2.85187700  
H 0.39921400 -1.69155700 -2.95585400  
H 1.43789400 -0.32569600 -3.45601100  
H 2.14997300 -1.94915700 -3.19094600  
H 1.50375000 1.74067400 -0.43716800



**Table S-30.** Geometric coordinates and thermally corrected MP2 energies for [A(THF)<sub>2</sub>(1,2,4-trimethoxybenzene)]<sup>‡</sup> (methoxy away).

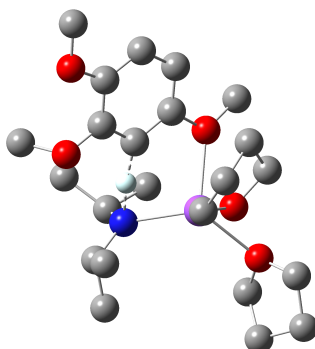

G = -1494.265437 Hartree  
G<sub>MP2</sub> = -1489.432843 Hartree

| Atom | X           | Y           | Z           | Atom | X           | Y           | Z           |
|------|-------------|-------------|-------------|------|-------------|-------------|-------------|
| Na   | 0.00000000  | 0.00000000  | 0.00000000  | H    | 5.10552300  | -0.74183200 | 0.78314200  |
| N    | -0.57520900 | -2.23638500 | 0.40903300  | C    | 4.24656800  | 1.29532600  | 0.74993600  |
| C    | -0.43356100 | -2.76202200 | 1.76975800  | H    | 5.04930600  | 1.57458400  | 0.05845900  |
| C    | 0.99682700  | -3.25450000 | 2.08391800  | H    | 4.45764200  | 1.77026600  | 1.71249200  |
| H    | 1.05088400  | -3.70778700 | 3.08335900  | C    | 2.87431100  | 1.71288000  | 0.18224700  |
| H    | 1.69875700  | -2.40863000 | 2.05659000  | H    | 2.19914100  | 2.11453600  | 0.94378000  |
| H    | 1.34679000  | -4.00277400 | 1.36456300  | H    | 2.96774700  | 2.44878600  | -0.62578600 |
| C    | -0.82710000 | -1.69732400 | 2.80260500  | O    | -0.44945900 | 2.07294900  | 1.12900300  |
| H    | -0.70339800 | -2.08049000 | 3.82358900  | C    | -0.82463700 | 3.19581000  | 0.30072000  |
| H    | -1.86630800 | -1.38565700 | 2.67343400  | H    | -0.86164800 | 2.85374800  | -0.73751800 |
| H    | -0.17624000 | -0.81332100 | 2.71046100  | H    | -0.05522300 | 3.97626300  | 0.39059700  |
| H    | -1.10726800 | -3.62669000 | 1.94018500  | C    | -2.17604800 | 3.67581700  | 0.83113400  |
| C    | -0.55553500 | -3.30072200 | -0.60558800 | H    | -2.35522400 | 4.73479900  | 0.62034200  |
| C    | -1.90486900 | -4.04229300 | -0.74766000 | H    | -2.98562400 | 3.08871000  | 0.38469100  |
| H    | -1.82578000 | -4.89173600 | -1.43993300 | C    | -2.05147600 | 3.36489000  | 2.33036200  |
| H    | -2.68007000 | -3.36524900 | -1.12472300 | H    | -3.01830500 | 3.27663000  | 2.83415700  |
| H    | -2.24171900 | -4.43351400 | 0.21917700  | H    | -1.47078100 | 4.14469300  | 2.83807900  |
| C    | -0.12195100 | -2.74789300 | -1.97179700 | C    | -1.28649700 | 2.03967200  | 2.31733800  |
| H    | -0.11461900 | -3.53504300 | -2.73719500 | H    | -0.63687700 | 1.90046500  | 3.18716200  |
| H    | 0.88862500  | -2.32195800 | -1.91459300 | H    | -1.96377900 | 1.18354800  | 2.23590400  |
| H    | -0.80266800 | -1.95727300 | -2.30458400 | O    | -1.45504100 | 0.42142300  | -1.80303800 |
| H    | 0.19189500  | -4.06575800 | -0.33197300 | C    | -2.72217600 | 0.27717700  | -1.19681400 |
| O    | 2.25710300  | 0.51216900  | -0.33998400 | C    | -2.74835100 | -0.56378200 | -0.07247400 |
| C    | 3.21978000  | -0.55982000 | -0.32797400 | C    | -3.97148400 | -0.65203300 | 0.58568800  |
| H    | 3.77376900  | -0.57237700 | -1.27863300 | C    | -5.12633400 | 0.05107800  | 0.15854000  |
| H    | 2.66414700  | -1.49484600 | -0.22377400 | C    | -5.05061000 | 0.84452700  | -0.98387900 |
| C    | 4.13703300  | -0.23697200 | 0.84816800  | C    | -3.83342500 | 0.96872800  | -1.67131000 |
| H    | 3.65679700  | -0.53503700 | 1.78721500  | H    | -3.79150700 | 1.60552200  | -2.54988800 |
|      |             |             |             | H    | -5.91852500 | 1.38248300  | -1.34851100 |

O -6.25905800 -0.09791100 0.92452500  
C -7.42055600 0.60488200 0.52962400  
H -8.18809100 0.36020000 1.26735300  
H -7.25672700 1.69192200 0.52679900  
H -7.76721800 0.29682700 -0.46712000  
O -4.05025700 -1.39646500 1.75657500  
C -4.80426200 -2.60361700 1.67572600  
H -4.39721900 -3.27006600 0.90478200  
H -4.71126400 -3.08764300 2.65190400  
H -5.86155500 -2.40496900 1.46909500  
C -1.39597600 0.92994100 -3.12534600  
H -0.36573900 0.79394000 -3.46356800  
H -2.07441700 0.38030700 -3.78968400  
H -1.64762500 1.99917100 -3.16671400  
H -1.70367900 -1.45531300 0.23828500

#### **IV. Full reference 38 (Gaussian):**

Gaussian 09, Revision A.02, M. J. Frisch, G. W. Trucks, H. B. Schlegel, G. E. Scuseria, M. A. Robb, J. R. Cheeseman, G. Scalmani, V. Barone, G. A. Petersson, H. Nakatsuji, X. Li, M. Caricato, A. Marenich, J. Bloino, B. G. Janesko, R. Gomperts, B. Mennucci, H. P. Hratchian, J. V. Ortiz, A. F. Izmaylov, J. L. Sonnenberg, D. Williams-Young, F. Ding, F. Lipparini, F. Egidi, J. Goings, B. Peng, A. Petrone, T. Henderson, D. Ranasinghe, V. G. Zakrzewski, J. Gao, N. Rega, G. Zheng, W. Liang, M. Hada, M. Ehara, K. Toyota, R. Fukuda, J. Hasegawa, M. Ishida, T. Nakajima, Y. Honda, O. Kitao, H. Nakai, T. Vreven, K. Throssell, J. A. Montgomery, Jr., J. E. Peralta, F. Ogliaro, M. Bearpark, J. J. Heyd, E. Brothers, K. N. Kudin, V. N. Staroverov, T. Keith, R. Kobayashi, J. Normand, K. Raghavachari, A. Rendell, J. C. Burant, S. S. Iyengar, J. Tomasi, M. Cossi, J. M. Millam, M. Klene, C. Adamo, R. Cammi, J. W. Ochterski, R. L. Martin, K. Morokuma, O. Farkas, J. B. Foresman, and D. J. Fox, Gaussian, Inc., Wallingford CT, 2016.
